# Supplementary material for: Iridium-catalyzed intramolecular asymmetric allylic etherification of salicylic acid derivatives with chiral-bridged biphenyl phosphoramidite ligands
Source: Royal Society of Chemistry journal article supplement (doi:10.1039/d1qo00566a), 2021-01-01
Supplement: d1qo00566a1.pdf [file d1qo00566a1.pdf]

## *Supporting Information for*

# **Iridium-Catalyzed Intramolecular Asymmetric Allylic Etherification of Salicylic Acid Derivatives with Chiral-Bridged Biphenyl Phosphoramidite Ligands**

Bendu Pan,<sup>†</sup> Jia-Sheng Ouyang,<sup>†</sup> Yaqi Zhang,<sup>†</sup> Hao Liang,<sup>†</sup> Qiang Ni,<sup>†</sup> Bin Chen,<sup>†</sup> Xiaoyun Pu,<sup>†</sup> Long Jiang,<sup>‡</sup> Rihui Cao<sup>†</sup> and Liqin Qiu<sup>\*,†</sup>

<sup>†</sup>School of Chemistry, The Key Laboratory of Low-Carbon Chemistry & Energy Conservation of Guangdong Province, Sun Yat-Sen University, Guangzhou 510275, China

<sup>‡</sup>Instrumental Analysis and Research Centre, Sun Yat-sen University, Guangzhou 510275, China

\*Email: qiuliqin@mail.sysu.edu.cn

## **Table of Contents:**

|                                                                                      |             |
|--------------------------------------------------------------------------------------|-------------|
| <b>1. General considerations</b> .....                                               | <b>S1</b>   |
| <b>2. Table S1 Optimization of Reaction Conditions</b> <sup>†††</sup> .....          | <b>S2</b>   |
| <b>3. Experimental Procedures</b> .....                                              | <b>S3</b>   |
| 3.1 General Procedure for the Synthesis of Salicylic Acid Derivatives <b>1</b> ..... | <b>S3</b>   |
| 3.2 General Procedure for the Allylic Etherification of <b>1</b> .....               | <b>S15</b>  |
| 3.3 Gram-scale Reaction .....                                                        | <b>S30</b>  |
| 3.4 Procedure for the Synthesis of <b>3v</b> .....                                   | <b>S30</b>  |
| 3.5 Procedure for the Synthesis of <b>3a</b> .....                                   | <b>S31</b>  |
| 3.6 Procedure for the Synthesis of <b>4a</b> .....                                   | <b>S32</b>  |
| <b>4. Copies of NMR Spectra</b> .....                                                | <b>S35</b>  |
| <b>5. Copies of HPLC Chromatograms</b> .....                                         | <b>S86</b>  |
| <b>6. X-ray Crystallographic Data</b> .....                                          | <b>S111</b> |

## 1. General considerations

Unless otherwise stated, all syntheses and manipulations of air- and moisture-sensitive materials were carried out in a nitrogen-filled glovebox or under nitrogen atmosphere using standard Schlenk techniques. All glassware was oven-dried immediately prior to use. All solvents were freshly distilled and degassed according to standard methods. Reactions were magnetically stirred and monitored by analytical thin-layer chromatography (TLC). TLC was performed on Merck silica gel 60 F254 TLC glass plates and visualized by exposure to ultraviolet light. Organic solutions were concentrated by rotary evaporation at 20 – 45 °C.

All chemicals and reagents available from commercial sources were directly used without further purification. Chromatographic purification of products was accomplished using forced-flow chromatography on silica gel (200 – 300 mesh). <sup>1</sup>H, <sup>19</sup>F, and <sup>13</sup>C NMR spectra were recorded on a Bruker Ascend 400 MHz spectrometer at ambient temperature. High-resolution mass spectra (HRMS) were obtained with Shimadzu LC-20AT mass spectrometer. Optical rotations were measured on SGW®-5 automatic polarimeter. Enantiomeric excesses (ee values) of the products were determined by chiral HPLC analysis using an Agilent HP 1200 instrument (n-hexane/2-propanol as eluent) with a Chiralpak IF-3 or IA-3 Column. The phosphoramidite ligands **L1** – **L8** were prepared according to the reported procedures.

## 2. Table S1 Optimization of Reaction Conditions<sup>a,SEP</sup>

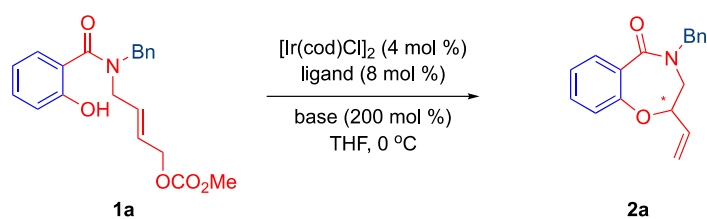

| entry           | solvent | ligand    | base                            | t[°C] | T[h]   | yield[%] <sup>b</sup> | ee[%] <sup>c</sup> |
|-----------------|---------|-----------|---------------------------------|-------|--------|-----------------------|--------------------|
| 1               | THF     | <b>L1</b> | DBU                             | 0     | 10     | 91                    | 90                 |
| 2               | THF     | <b>L2</b> | DBU                             | 0     | 10     | 92                    | -90                |
| 3               | THF     | <b>L3</b> | DBU                             | 0     | 20     | trace                 | \                  |
| 4               | THF     | <b>L4</b> | DBU                             | 0     | 8      | 94                    | 92                 |
| 5               | THF     | <b>L5</b> | DBU                             | 0     | 20     | 32                    | -51                |
| 6               | THF     | <b>L6</b> | DBU                             | 0     | 20     | 37                    | -89                |
| 7               | THF     | <b>L7</b> | DBU                             | 0     | 8      | 96                    | 93                 |
| 8               | THF     | <b>L8</b> | DBU                             | 0     | 20     | 63                    | 87                 |
| 9               | THF     | <b>L7</b> | K <sub>3</sub> PO <sub>4</sub>  | 0     | 16     | 95                    | 88                 |
| 10              | THF     | <b>L7</b> | DABCO                           | 0     | 16     | 93                    | 89                 |
| 11              | THF     | <b>L7</b> | Et <sub>3</sub> N               | 0     | 16     | 84                    | 88                 |
| 12              | THF     | <b>L7</b> | Cs <sub>2</sub> CO <sub>3</sub> | 0     | 16     | 67                    | 84                 |
| 13              | THF     | <b>L7</b> | \                               | 0     | 16     | 61                    | 84                 |
| 14              | DME     | <b>L7</b> | DBU                             | 0     | 22     | 76                    | 91                 |
| 15              | dioxane | <b>L7</b> | DBU                             | 0     | 22     | 79                    | 87                 |
| 16              | DCE     | <b>L7</b> | DBU                             | 0     | 22     | 94                    | 79                 |
| 17              | DCM     | <b>L7</b> | DBU                             | 0     | 22     | 87                    | 73                 |
| 18              | MTBE    | <b>L7</b> | DBU                             | 0     | 22     | 94                    | 78                 |
| 19              | PhMe    | <b>L7</b> | DBU                             | 0     | 22     | 91                    | 89                 |
| 20              | THF     | <b>L7</b> | DBU                             | -10   | 8      | 96                    | 92                 |
| 21              | THF     | <b>L7</b> | DBU                             | 10    | 2      | 94                    | 92                 |
| 22              | THF     | <b>L1</b> | DBU                             | rt    | 0.5    | 92                    | 90                 |
| 23              | THF     | <b>L7</b> | DBU                             | rt    | 10 min | 94                    | 92                 |
| 24              | THF     | <b>L7</b> | DBU                             | 40    | 10 min | 92                    | 91                 |
| 25              | THF     | <b>L7</b> | DBU                             | 50    | 10 min | 90                    | 85                 |
| 26 <sup>d</sup> | THF     | <b>L7</b> | DBU                             | rt    | 10 min | 96                    | 93                 |
| 27 <sup>e</sup> | THF     | <b>L7</b> | DBU                             | rt    | 10 min | 30                    | 92                 |

<sup>a</sup> Conditions: [Ir(cod)Cl]<sub>2</sub> (4 mol %), ligand (8 mol %), base (0.2 mmol), and **1a** (0.1 mmol) in solvent (2.0 mL). <sup>b</sup> Isolated yields. <sup>c</sup> Determined by chiral HPLC analysis. <sup>d</sup> 2 mol % of Ir catalyst was used. <sup>e</sup> 1 mol % of Ir catalyst was used.

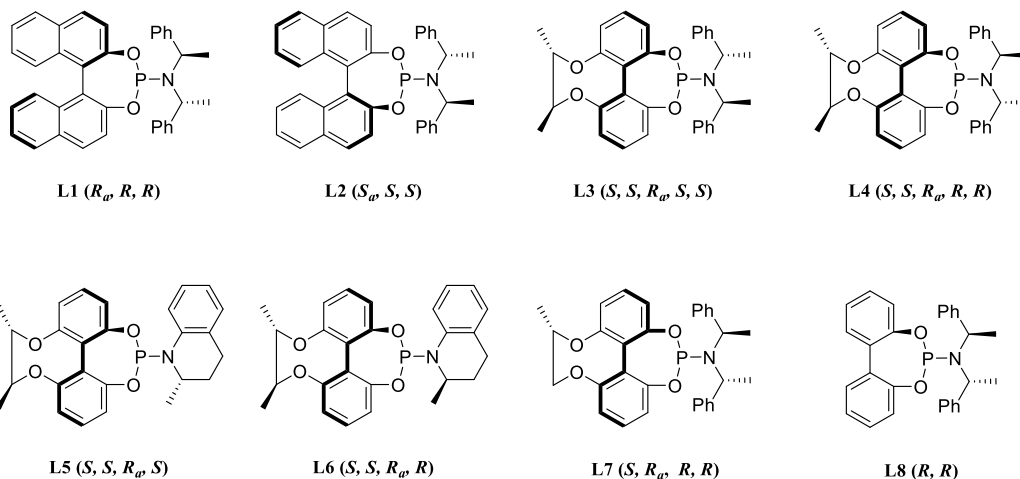

### 3. Experimental Procedures

#### 3.1 General Procedure for the Synthesis of Salicylic Acid Derivatives 1

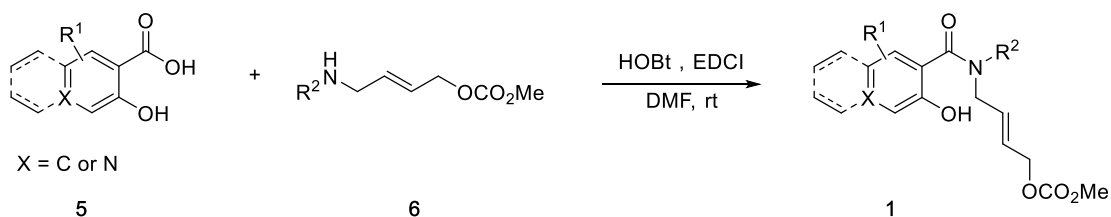

To a solution of substituted salicylic acids **5** (2 mmol, 1.0 equiv.) in DMF (10 mL), 1-hydroxybenzotriazole (HOBT) (297 mg, 2.2 mmol, 1.1 equiv.) and *N*-(3-dimethylaminopropyl)-*N'*-ethylcarbodiimide hydrochloride (EDC·HCl) (422 mg, 2.2 mmol, equiv.) were added. This mixture was stirred for 30 minutes at room temperature, then compounds **6** (2 mmol, 1.0 equiv.) was added. After the reaction was complete (monitored by TLC), the crude reaction mixture was diluted with EtOAc (20 mL) and washed with water (10 mL x 3) and brine (15 mL x 3). The combined organic layers were dried over Na<sub>2</sub>SO<sub>4</sub>. Afterwards, the solvents were removed under reduced pressure. The residue was purified by silica gel column chromatography (petroleum/EtOAc = 3 : 1) to afford the desired compounds **1**.

**(E)-4-(N-benzyl-2-hydroxybenzamido)but-2-en-1-yl methyl carbonate (1a)**

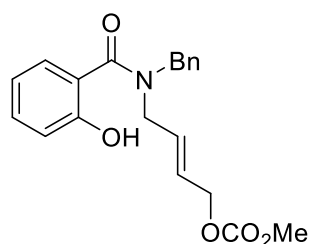

Yellow oil, 0.67 g, 95% yield;  $^1\text{H}$  NMR (400 MHz,  $\text{CDCl}_3$ )  $\delta$  9.78 (s, 1H), 7.47 – 7.26 (m, 7H), 7.05 (d,  $J = 8.2$  Hz, 1H), 6.80 (t,  $J = 7.4$  Hz, 1H), 5.91 (m, 1H), 5.83 – 5.65 (m, 1H), 4.76 (s, 2H), 4.69 (d,  $J = 5.2$  Hz, 2H), 4.09 (d,  $J = 4.8$  Hz, 2H), 3.83 (s, 3H).  $^{13}\text{C}$  NMR (101 MHz,  $\text{CDCl}_3$ )  $\delta$  172.42, 159.09, 155.52, 136.13, 132.93, 129.39, 128.95, 127.77, 127.55, 127.43, 118.65, 118.28, 118.19, 117.06, 67.29, 54.92. HRMS (ESI) calcd for  $\text{C}_{20}\text{H}_{21}\text{NO}_5$   $[\text{M}+\text{H}]^+$ : 356.1493, Found: 356.1485.

**(E)-4-(N-benzyl-2-hydroxy-4-methylbenzamido)but-2-en-1-yl methyl carbonate (1b)**

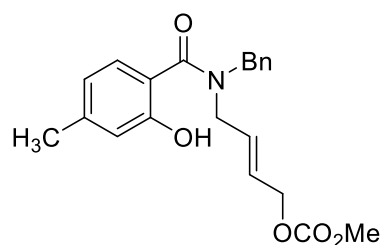

Yellow oil, 0.63 g, 85% yield;  $^1\text{H}$  NMR (400 MHz,  $\text{CDCl}_3$ )  $\delta$  10.01 (s, 1H), 7.43 – 7.27 (m, 5H), 7.21 (d,  $J = 8.0$  Hz, 1H), 6.85 (s, 1H), 6.60 (d,  $J = 7.9$  Hz, 1H), 5.91 (m, 1H), 5.83 – 5.70 (m, 1H), 4.75 (s, 2H), 4.69 (d,  $J = 5.5$  Hz, 2H), 4.07 (d,  $J = 5.1$  Hz, 2H), 3.83 (s, 3H), 2.32 (s, 3H).  $^{13}\text{C}$  NMR (101 MHz,  $\text{CDCl}_3$ )  $\delta$  172.64, 159.39, 155.53, 143.93, 136.24, 129.52, 128.93, 127.71, 127.43, 127.36, 119.62, 118.46, 114.04, 67.33, 54.92, 21.54. HRMS (ESI) calcd for  $\text{C}_{21}\text{H}_{23}\text{NO}_5$   $[\text{M}+\text{H}]^+$ : 370.1649, Found: 370.1643.

**(E)-4-(N-benzyl-2-hydroxy-5-methylbenzamido)but-2-en-1-yl methyl carbonate (1c)**

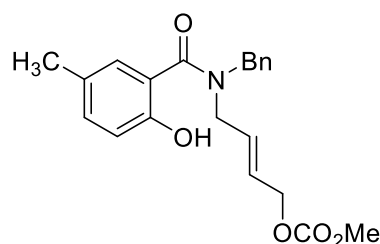

Yellow oil, 0.61 g, 83% yield;  $^1\text{H}$  NMR (400 MHz,  $\text{CDCl}_3$ )  $\delta$  7.34 (m, 5H), 7.20 – 7.09 (m, 2H), 6.94 (d,  $J = 8.4$  Hz, 1H), 5.96 – 5.85 (m, 1H), 5.82 – 5.71 (m, 1H), 4.75 (s, 2H), 4.69 (d,  $J = 5.5$  Hz, 2H), 4.08 (d,  $J = 5.0$  Hz, 2H), 3.83 (s, 3H), 2.19 (s, 3H).  $^{13}\text{C}$  NMR (101 MHz,  $\text{CDCl}_3$ )  $\delta$  172.41, 156.24, 155.54, 136.29, 133.47, 129.63, 128.89, 127.89, 127.72, 127.57, 127.44, 117.82, 117.33, 67.33, 54.91, 20.42. HRMS (ESI) calcd for  $\text{C}_{21}\text{H}_{23}\text{NO}_5$   $[\text{M}+\text{H}]^+$ : 370.1661, Found: 370.1642.

**(E)-4-(N-benzyl-2-hydroxy-6-methylbenzamido)but-2-en-1-yl methyl carbonate (1d)**

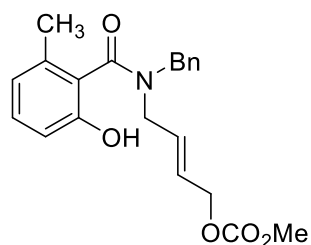

Yellow oil, 0.63 g, 85% yield;  $^1\text{H}$  NMR (400 MHz,  $\text{CDCl}_3$ )  $\delta$  7.46 – 7.27 (m, 5H), 7.21 (d,  $J = 8.0$  Hz, 1H), 6.85 (s, 1H), 6.60 (d,  $J = 7.8$  Hz, 1H), 5.90 (m, 1H), 5.77 (m, 1H), 4.75 (s, 2H), 4.69 (m, 2H), 4.08 (d,  $J = 8.0$  Hz, 2H), 3.83 (s, 3H), 2.32 (s, 3H).  $^{13}\text{C}$  NMR (101 MHz,  $\text{CDCl}_3$ )  $\delta$  170.44, 155.57, 152.88, 135.48, 129.98, 128.69, 128.36, 127.66, 122.00, 114.21, 67.41, 54.90, 19.14. HRMS (ESI) calcd for  $\text{C}_{21}\text{H}_{23}\text{NO}_5$   $[\text{M}+\text{H}]^+$ : 370.1661, Found: 370.1642.

**(E)-4-(N-benzyl-2-hydroxy-3-methoxybenzamido)but-2-en-1-yl methyl carbonate (1e)**

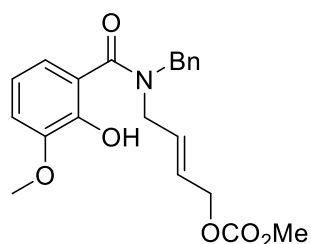

Yellow oil, 0.72 g, 93% yield;  $^1\text{H NMR}$  (400 MHz,  $\text{CDCl}_3$ )  $\delta$  7.32 (m, 5H), 6.92 (d,  $J = 3.7$  Hz, 2H), 6.86 (d,  $J = 7.1$  Hz, 1H), 5.82 (m, 1H), 5.72 (m, 1H), 4.68 (s, 2H), 4.65 (d,  $J = 4.0$  Hz, 2H), 3.99 (d,  $J = 4.0$  Hz, 2H), 3.92 (s, 3H), 3.82 (s, 3H).  $^{13}\text{C NMR}$  (101 MHz,  $\text{CDCl}_3$ )  $\delta$  170.23, 155.54, 147.60, 144.55, 136.49, 129.92, 128.74, 127.69, 127.56, 126.90, 120.91, 119.65, 119.57, 112.47, 67.47, 56.19, 54.89, 53.44. HRMS (ESI) calcd for  $\text{C}_{21}\text{H}_{23}\text{NO}_6$   $[\text{M}+\text{H}]^+$ : 386.1610, Found: 386.1588.

**(E)-4-(N-benzyl-2-hydroxy-4-methoxybenzamido)but-2-en-1-yl methyl carbonate (1f)**

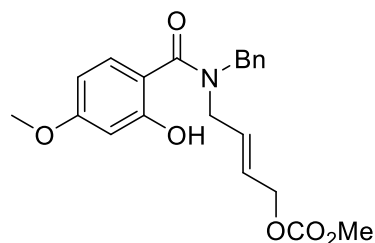

Yellow oil, 0.56g, 73% yield;  $^1\text{H NMR}$  (400 MHz,  $\text{CDCl}_3$ )  $\delta$  7.35 (m, 6H), 6.55 (d,  $J = 2.3$  Hz, 1H), 6.33 (dd,  $J = 8.7, 2.1$  Hz, 1H), 5.92 (m, 1H), 5.85 – 5.71 (m, 1H), 4.74 (s, 2H), 4.69 (d,  $J = 8.0$  Hz, 2H), 4.08 (d,  $J = 4.0$  Hz, 2H), 3.83 (s, 3H), 3.82 (s, 3H).  $^{13}\text{C NMR}$  (101 MHz,  $\text{CDCl}_3$ )  $\delta$  172.85, 163.52, 162.36, 155.52, 136.29, 129.58, 128.94, 127.70, 127.42, 108.94, 105.95, 102.06, 67.33, 55.37, 54.90, 50.79, 48.76. HRMS (ESI) calcd for  $\text{C}_{21}\text{H}_{23}\text{NO}_6$   $[\text{M}+\text{H}]^+$ : 386.1610, Found: 386.1589.

**(E)-4-(N-benzyl-2-hydroxy-5-methoxybenzamido)but-2-en-1-yl methyl carbonate (1g)**

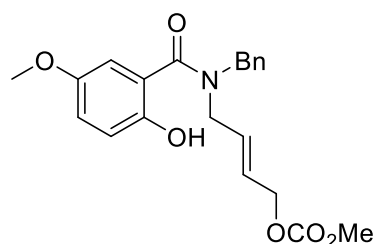

Yellow oil, 0.67 g, 87% yield;  $^1\text{H}$  NMR (400 MHz,  $\text{CDCl}_3$ )  $\delta$  9.41 – 8.94 (m, 1H), 7.37 (m, 5H), 6.93 (m, 3H), 6.11 – 5.71 (m, 2H), 4.76 (s, 2H), 4.70 (d,  $J = 4.0$  Hz, 2H), 4.10 (m, 2H), 3.83 (s, 3H), 3.51 (s, 3H).  $^{13}\text{C}$  NMR (101 MHz,  $\text{CDCl}_3$ )  $\delta$  172.20, 155.54, 152.50, 151.77, 136.29, 129.45, 128.98, 127.74, 127.51, 127.24, 119.87, 118.94, 117.40, 111.21, 67.29, 55.52, 54.90, 48.50. HRMS (ESI) calcd for  $\text{C}_{21}\text{H}_{23}\text{NO}_6$   $[\text{M}+\text{H}]^+$ : 386.1610, Found: 386.1589.

**(E)-4-(N-benzyl-2-hydroxy-6-methoxybenzamido)but-2-en-1-yl methyl carbonate (1h)**

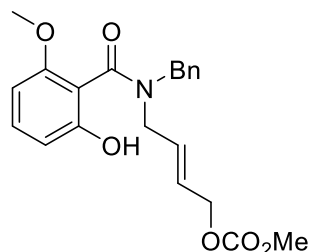

Brown oil, 0.67 g, 87% yield;  $^1\text{H}$  NMR (400 MHz,  $\text{CDCl}_3$ )  $\delta$  8.10 (s, 1H), 7.26 (m, 6H), 6.57 (d,  $J = 8.0$  Hz, 1H), 6.43 (d,  $J = 7.4$  Hz, 1H), 5.80 (m, 1H), 5.74 – 5.45 (m, 1H), 4.86 – 4.21 (m, 4H), 3.79 (m, 8H).  $^{13}\text{C}$  NMR (101 MHz,  $\text{CDCl}_3$ )  $\delta$  168.86, 156.43, 156.35, 156.33, 156.01, 155.96, 155.91, 155.88, 155.62, 155.57, 136.55, 136.38, 136.33, 131.14, 131.11, 130.47, 129.63, 128.57, 127.89, 127.84, 127.59, 127.25, 127.22, 125.83, 111.70, 111.60, 110.12, 102.30, 67.85, 67.34, 55.55, 54.85, 52.15, 49.62, 47.15, 44.78. HRMS (ESI) calcd for  $\text{C}_{21}\text{H}_{23}\text{NO}_6$   $[\text{M}+\text{H}]^+$ : 386.1610, Found: 386.1589.



**(E)-4-(N-benzyl-4-fluoro-2-hydroxybenzamido)but-2-en-1-yl methyl carbonate (1i)**

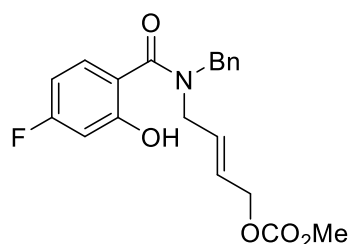

Brown oil, 0.64 g, 86% yield;  $^1\text{H}$  NMR (400 MHz,  $\text{CDCl}_3$ )  $\delta$  10.46 (s, 1H), 7.47 – 7.28 (m, 6H), 6.73 (m, 1H), 6.51 (m, 1H), 5.91 (m, 1H), 5.83 – 5.73 (m, 1H), 4.74 (s, 2H), 4.69 (d,  $J = 8.0$  Hz, 2H), 4.07 (d,  $J = 4.9$  Hz, 2H), 3.83 (s, 3H).  $^{13}\text{C}$  NMR (101 MHz,  $\text{CDCl}_3$ )  $\delta$  171.99, 162.95 (d,  $J = 221.0$  Hz), 161.71, 155.52, 135.94, 129.16 (dd,  $J = 15.8, 12.0$  Hz), 127.77 (d,  $J = 16.6$  Hz), 127.37, 113.19, 106.30, 106.08, 105.37, 105.14, 67.23, 54.92, 50.68, 48.70.  $^{19}\text{F}$  NMR (376 MHz,  $\text{CDCl}_3$ )  $\delta$  -105.28. HRMS (ESI) calcd for  $\text{C}_{20}\text{H}_{20}\text{FNO}_5$   $[\text{M}+\text{H}]^+$ : 374.1409, Found: 374.1390.

**(E)-4-(N-benzyl-5-fluoro-2-hydroxybenzamido)but-2-en-1-yl methyl carbonate (1j)**

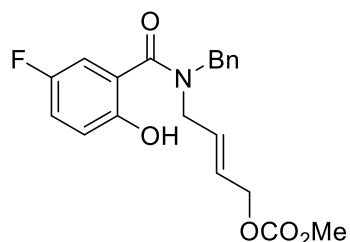

Brown oil, 0.64 g, 86% yield;  $^1\text{H}$  NMR (400 MHz,  $\text{CDCl}_3$ )  $\delta$  7.43 – 7.28 (m, 5H), 7.03 (m, 3H), 5.90 (m, 1H), 5.86 (m, 1H), 4.73 (s, 2H), 4.69 (d,  $J = 4.0$  Hz, 2H), 4.06 (d,  $J = 4.9$  Hz, 2H), 3.83 (s, 3H).  $^{13}\text{C}$  NMR (101 MHz,  $\text{CDCl}_3$ )  $\delta$  171.11, 155.52, 154.95 (d,  $J = 237.0$  Hz), 154.57, 135.80, 129.05 (d,  $J = 8.9$  Hz), 127.91, 127.61 (d,  $J = 23.4$  Hz), 119.80, 119.57, 119.23 (d,  $J = 7.6$  Hz), 117.92, 113.54, 113.30, 67.19, 54.93, 50.41, 48.58.  $^{19}\text{F}$  NMR (376 MHz,  $\text{CDCl}_3$ )  $\delta$  -124.04. HRMS (ESI) calcd for  $\text{C}_{20}\text{H}_{20}\text{FNO}_5$   $[\text{M}+\text{H}]^+$ : 374.1409, Found: 374.1392.

**(E)-4-(N-benzyl-4-chloro-2-hydroxybenzamido)but-2-en-1-yl methyl carbonate (1k)**

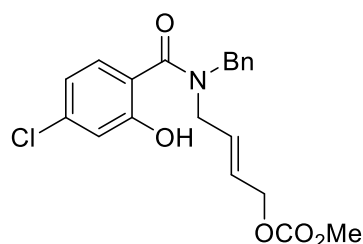

Brown oil, 0.57 g, 73% yield;  $^1\text{H}$  NMR (400 MHz,  $\text{CDCl}_3$ )  $\delta$  10.13 (s, 1H), 7.46 – 7.25 (m, 6H), 7.03 (d,  $J = 1.4$  Hz, 1H), 6.78 (d,  $J = 8.1$  Hz, 1H), 5.88 (m, 1H), 5.83 – 5.70 (m, 1H), 4.72 (s, 2H), 4.68 (d,  $J = 8.0$  Hz, 2H), 4.06 (d,  $J = 4.8$  Hz, 2H), 3.83 (s, 3H).  $^{13}\text{C}$  NMR (101 MHz,  $\text{CDCl}_3$ )  $\delta$  171.70, 159.81, 155.52, 138.37, 135.87, 129.08, 129.01, 128.37, 127.87, 127.71, 127.41, 119.12, 118.35, 115.87, 115.83, 67.22, 54.93, 50.67, 48.62. HRMS (ESI) calcd for  $\text{C}_{20}\text{H}_{20}\text{ClNO}_5$   $[\text{M}+\text{H}]^+$ : 390.1114, Found: 390.1094.

**(E)-4-(N-benzyl-5-chloro-2-hydroxybenzamido)but-2-en-1-yl methyl carbonate (1l)**

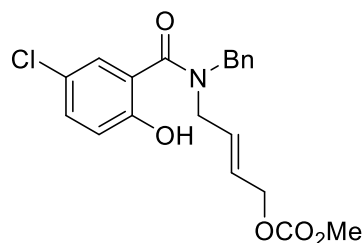

Brown oil, 0.5 g, 64% yield;  $^1\text{H}$  NMR (400 MHz,  $\text{CDCl}_3$ )  $\delta$  9.60 (s, 1H), 7.46 – 7.23 (m, 7H), 6.97 (d,  $J = 8.5$  Hz, 1H), 5.89 (m, 1H), 5.79 (m, 1H), 4.73 (s, 2H), 4.69 (d,  $J = 4.0$  Hz, 2H), 4.06 (d,  $J = 5.2$  Hz, 2H), 3.91 – 3.66 (s, 3H).  $^{13}\text{C}$  NMR (101 MHz,  $\text{CDCl}_3$ )  $\delta$  171.01, 157.15, 155.52, 135.79, 132.60, 129.02, 129.00, 127.92, 127.85, 127.58, 127.04, 123.58, 119.53, 118.68, 67.18, 54.94, 50.52, 49.00. HRMS (ESI) calcd for  $\text{C}_{20}\text{H}_{20}\text{ClNO}_5$   $[\text{M}+\text{H}]^+$ : 390.1114, Found: 390.1093.

**(E)-4-(N-benzyl-5-bromo-2-hydroxybenzamido)but-2-en-1-yl methyl carbonate (1m)**

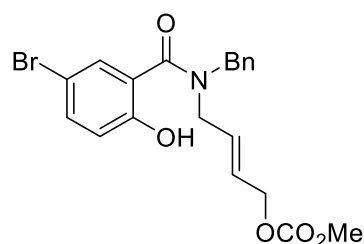

Pale yellow oil, 0.81 g, 93% yield;  $^1\text{H}$  NMR (400 MHz,  $\text{CDCl}_3$ )  $\delta$  9.49 (s, 1H), 7.32 (m, 7H), 6.83 (d,  $J = 8.7$  Hz, 1H), 5.88 – 5.79 (m, 1H), 5.78 – 5.68 (m, 1H), 4.69 (s, 2H), 4.65 (d,  $J = 8.0$  Hz, 2H), 4.01 (m, 2H), 3.81 (s, 3H).  $^{13}\text{C}$  NMR (101 MHz,  $\text{CDCl}_3$ )  $\delta$  170.60, 156.21, 155.53, 135.87, 134.86, 129.94, 129.10, 128.92, 127.84, 127.70, 120.91, 119.61, 110.73, 67.23, 60.45, 54.92, 48.59. HRMS (ESI) calcd for  $\text{C}_{20}\text{H}_{20}\text{BrNO}_5$   $[\text{M}+\text{H}]^+$ : 434.0609, Found: 434.0589.

**(E)-4-(N-benzyl-2-hydroxy-4-nitrobenzamido)but-2-en-1-yl methyl carbonate (1n)**

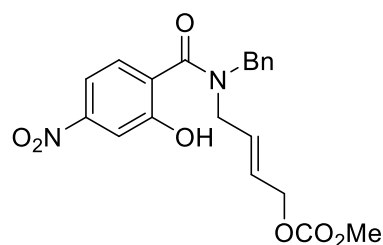

Brown oil, 0.74 g, 92% yield;  $^1\text{H}$  NMR (400 MHz,  $\text{CDCl}_3$ )  $\delta$  7.79 (d,  $J = 1.8$  Hz, 1H), 7.66 (d,  $J = 8.0$  Hz, 1H), 7.47 – 7.25 (m, 6H), 5.84 (m, 1H), 5.77 (m, 1H), 4.70 (s, 2H), 4.67 (d,  $J = 4.0$  Hz, 2H), 4.02 (d,  $J = 3.7$  Hz, 2H), 3.83 (s, 3H).  $^{13}\text{C}$  NMR (101 MHz,  $\text{CDCl}_3$ )  $\delta$  170.11, 157.71, 155.54, 149.86, 135.44, 129.04, 128.63, 128.10, 128.04, 127.93, 113.87, 112.84, 67.15, 54.98. HRMS (ESI) calcd for  $\text{C}_{20}\text{H}_{20}\text{N}_2\text{O}_7$   $[\text{M}+\text{H}]^+$ : 401.1355, Found: 401.1335.

**(E)-4-(N-benzyl-2-hydroxy-4-(trifluoromethyl)benzamido)but-2-en-1-yl methyl carbonate (1o)**

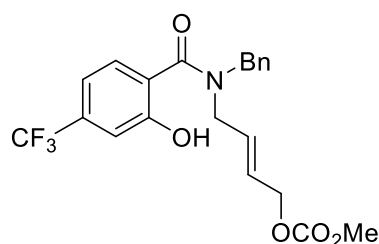

Pale yellow oil, 0.8 g, 95% yield;  $^1\text{H}$  NMR (400 MHz,  $\text{CDCl}_3$ )  $\delta$  9.85 (s, 1H), 7.48 – 7.36 (m, 4H), 7.28 (d,  $J = 9.3$  Hz, 3H), 7.06 (d,  $J = 7.3$  Hz, 1H), 5.88 (m, 1H), 5.77 (m, 1H), 4.73 (s, 2H), 4.68 (d,  $J = 8.0$  Hz, 2H), 4.06 (m, 2H), 3.83 (s, 3H).  $^{13}\text{C}$  NMR (101 MHz,  $\text{CDCl}_3$ )  $\delta$  170.97, 158.26, 155.53, 135.68, 134.35, 134.02, 129.04, 128.88, 127.95, 127.93, 127.81, 124.65, 121.94, 121.18, 115.33 (dd,  $J = 25.2, 3.7$  Hz), 67.20, 58.45, 54.96, 53.43.  $^{19}\text{F}$  NMR (376 MHz,  $\text{CDCl}_3$ )  $\delta$  -63.51. HRMS (ESI) calcd for  $\text{C}_{21}\text{H}_{20}\text{F}_3\text{NO}_5$   $[\text{M}+\text{H}]^+$ : 424.1378, Found: 424.1357.

**(E)-4-(N-benzyl-3-hydroxy-2-naphthamido)but-2-en-1-yl methyl carbonate (1p)**

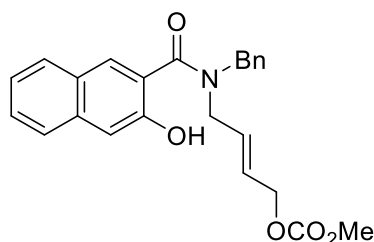

Pale yellow oil, 0.75 g, 92% yield;  $^1\text{H}$  NMR (400 MHz,  $\text{CDCl}_3$ )  $\delta$  7.86 (s, 1H), 7.65 (d,  $J = 8.2$  Hz, 1H), 7.50 – 7.29 (m, 9H), 5.93 (m, 1H), 5.85 – 5.76 (m, 1H), 4.80 (s, 2H), 4.70 (d,  $J = 5.3$  Hz, 2H), 4.13 (m, 2H), 3.84 (s, 3H).  $^{13}\text{C}$  NMR (101 MHz,  $\text{CDCl}_3$ )  $\delta$  171.82, 155.56, 153.80, 136.14, 135.86, 129.43, 128.96, 128.44, 127.99, 127.82, 127.57, 126.96, 126.32, 123.99, 120.72, 112.17, 67.30, 54.93. HRMS (ESI) calcd for  $\text{C}_{24}\text{H}_{23}\text{NO}_5$   $[\text{M}+\text{H}]^+$ : 406.1665, Found: 406.1642.

**(E)-4-(N-benzyl-3-hydroxyisonicotinamido)but-2-en-1-yl methyl carbonate**

**(1q)**

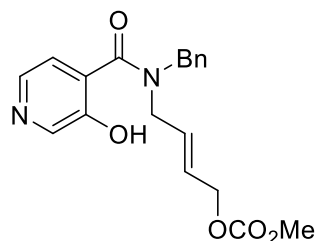

Yellow oil, 0.67 g, 87% yield;  $^1\text{H}$  NMR (400 MHz,  $\text{CDCl}_3$ )  $\delta$  8.57 (s, 1H), 8.13 (s, 1H), 7.45 – 7.23 (m, 6H), 5.76 (m, 2H), 4.66 (s, 2H), 4.64 (m, 2H), 4.04 (m, 2H), 3.83 (s, 3H).  $^{13}\text{C}$  NMR (101 MHz,  $\text{CDCl}_3$ )  $\delta$  168.25, 155.49, 150.99, 139.67, 138.55, 135.84, 130.62, 128.80, 127.78, 121.94, 67.18, 60.43, 54.89, 53.49. HRMS (ESI) calcd for  $\text{C}_{19}\text{H}_{20}\text{N}_2\text{O}_5$   $[\text{M}+\text{H}]^+$ : 357.1455, Found: 357.1438.

**(E)-4-(N-benzyl-2-hydroxy-4-(thiophen-3-yl)benzamido)but-2-en-1-yl methyl carbonate (1r)**

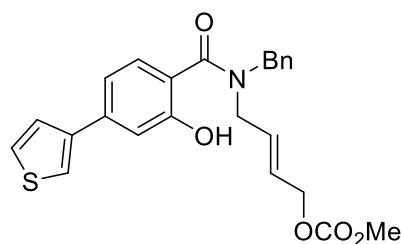

Yellow oil, 0.75 g, 86% yield;  $^1\text{H}$  NMR (400 MHz,  $\text{CDCl}_3$ )  $\delta$  10.17 (s, 1H), 7.53 (s, 1H), 7.45 – 7.29 (m, 9H), 7.04 (d,  $J = 7.9$  Hz, 1H), 5.93 (m, 1H), 5.79 (m, 1H), 4.78 (s, 2H), 4.71 (d,  $J = 5.1$  Hz, 2H), 4.11 (d,  $J = 4.4$  Hz, 2H), 3.84 (s, 3H).  $^{13}\text{C}$  NMR (101 MHz,  $\text{CDCl}_3$ )  $\delta$  172.34, 159.85, 155.53, 140.96, 140.25, 136.15, 129.38, 128.99, 128.02, 127.78, 127.58, 126.52, 126.09, 121.79, 116.74, 115.58, 115.34, 67.31, 54.93. HRMS (ESI) calcd for  $\text{C}_{24}\text{H}_{23}\text{NO}_5\text{S}$   $[\text{M}+\text{H}]^+$ : 438.1386, Found: 438.1361.

**(E)-4-(N-benzyl-4-(furan-2-yl)-2-hydroxybenzamido)but-2-en-1-yl methyl carbonate (1s)**

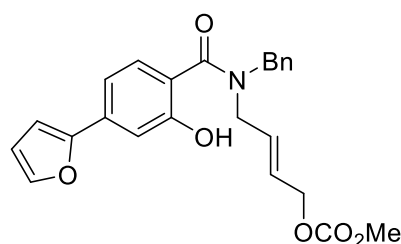

Brown oil, 0.78 g, 93% yield;  $^1\text{H}$  NMR (400 MHz,  $\text{CDCl}_3$ )  $\delta$  7.51 (s, 1H), 7.37 (m, 7H), 7.11 (d,  $J = 8.1$  Hz, 1H), 6.73 (s, 1H), 6.50 (s, 1H), 5.93 (m, 1H), 5.79 (m, 1H), 4.77 (s, 2H), 4.70 (d,  $J = 5.2$  Hz, 2H), 4.10 (d,  $J = 4.7$  Hz, 2H), 3.84 (s, 3H).  $^{13}\text{C}$  NMR (101 MHz,  $\text{CDCl}_3$ )  $\delta$  172.31, 159.83, 155.53, 152.71, 143.00, 136.11, 135.05, 129.35, 128.98, 128.03, 127.78, 127.61, 127.40, 115.31, 114.07, 112.80, 111.90, 107.15, 67.29, 54.93. HRMS (ESI) calcd for  $\text{C}_{24}\text{H}_{23}\text{NO}_6$   $[\text{M}+\text{H}]^+$ : 422.1614, Found: 422.1591.

**(E)-4-(N-benzyl-2-hydroxy-4-(6-methoxypyridin-3-yl)benzamido)but-2-en-1-yl methyl carbonate (1t)**

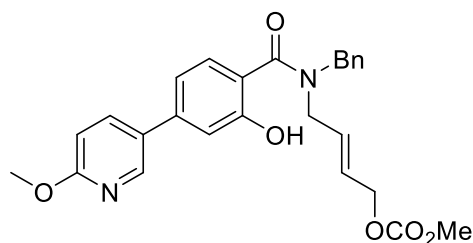

Yellow oil, 0.8 g, 87% yield;  $^1\text{H}$  NMR (400 MHz,  $\text{CDCl}_3$ )  $\delta$  8.38 (s, 1H), 7.78 (d,  $J = 8.5$  Hz, 1H), 7.43 – 7.28 (m, 6H), 7.19 (s, 1H), 6.96 (d,  $J = 7.7$  Hz, 1H), 6.82 (d,  $J = 8.5$  Hz, 1H), 5.92 (m, 1H), 5.83 – 5.69 (m, 1H), 4.77 (s, 2H), 4.69 (d,  $J = 5.5$  Hz, 2H), 4.09 (d,  $J = 5.1$  Hz, 2H), 3.99 (s, 3H), 3.82 (s, 3H).  $^{13}\text{C}$  NMR (101 MHz,  $\text{CDCl}_3$ )  $\delta$  172.12, 164.02, 159.39, 159.32, 155.53, 144.98, 142.26, 137.40, 136.09, 129.34, 128.98, 128.69, 128.18, 127.79, 127.56, 127.43, 116.91, 115.71, 110.99, 67.97, 67.31, 54.94, 53.75. HRMS (ESI) calcd for  $\text{C}_{26}\text{H}_{26}\text{N}_2\text{O}_6$   $[\text{M}+\text{H}]^+$ : 463.1882, Found: 463.1853.

**(E)-4-(N-benzyl-2-hydroxy-4-(naphthalen-2-yl)benzamido)but-2-en-1-yl methyl carbonate (1u)**

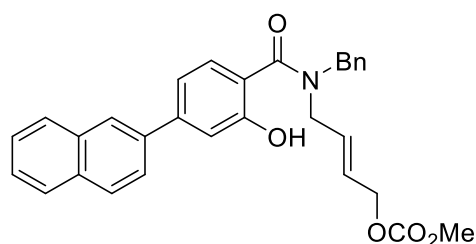

Yellow oil, 0.87 g, 90% yield;  $^1\text{H}$  NMR (400 MHz,  $\text{CDCl}_3$ )  $\delta$  7.92 (m, 3H), 7.64 – 7.31 (m, 12H), 7.22 (s, 1H), 6.96 (d,  $J = 7.7$  Hz, 1H), 5.96 (m, 1H), 5.82 (m, 1H), 4.84 (s, 2H), 4.72 (d,  $J = 4.5$  Hz, 2H), 4.17 (d,  $J = 3.4$  Hz, 2H), 3.84 (s, 3H).  $^{13}\text{C}$  NMR (101 MHz,  $\text{CDCl}_3$ )  $\delta$  172.30, 158.96, 155.56, 145.69, 138.98, 136.22, 133.77, 131.17, 129.49, 128.99, 128.33, 128.19, 127.90, 127.80, 127.56, 127.37, 126.71, 126.25, 125.93, 125.78, 125.31, 120.65, 119.63, 116.15, 67.34, 55.41, 54.94. HRMS (ESI) calcd for  $\text{C}_{30}\text{H}_{27}\text{NO}_5$   $[\text{M}+\text{H}]^+$ : 482.1917, Found: 482.1953.

**(E)-4-(2-hydroxy-N-(4-methoxybenzyl)benzamido)but-2-en-1-yl methyl carbonate (1v)**

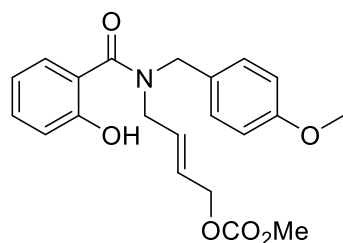

Yellow oil, 0.74 g, 96% yield;  $^1\text{H}$  NMR (400 MHz,  $\text{CDCl}_3$ )  $\delta$  7.36 – 7.28 (m, 2H), 7.23 (d,  $J = 8.1$  Hz, 2H), 7.03 (d,  $J = 8.2$  Hz, 1H), 6.92 (d,  $J = 8.4$  Hz, 2H), 6.81 (t,  $J = 7.4$  Hz, 1H), 5.80 (m, 2H), 4.69 (s, 2H), 4.52 (d,  $J = 4.2$  Hz, 2H), 4.12 (d,  $J = 5.3$  Hz, 2H), 3.83 (s, 3H), 3.79 (s, 3H).  $^{13}\text{C}$  NMR (101 MHz,  $\text{CDCl}_3$ )  $\delta$  172.20, 171.15, 159.28, 158.78, 155.51, 132.74, 129.65, 128.81, 127.91, 127.62, 127.21, 118.73, 118.12, 114.36, 63.01, 60.40, 55.31, 54.87. HRMS (ESI) calcd for  $\text{C}_{21}\text{H}_{23}\text{NO}_6$   $[\text{M}+\text{H}]^+$ : 386.1598, Found: 386.1591.

**(Z)-4-(2-hydroxy-N-(4-methoxybenzyl)benzamido)but-2-en-1-yl methyl carbonate ((Z)-1v)**

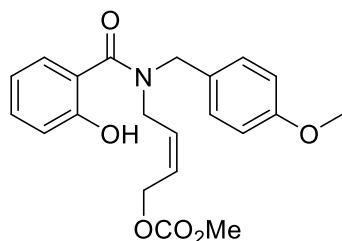

Yellow oil, 0.73 g, 95% yield;  $^1\text{H}$  NMR (400 MHz, )  $\delta$  7.36 – 7.27 (m, 2H), 7.23 (d,  $J = 7.9$  Hz, 2H), 7.03 (d,  $J = 8.2$  Hz, 1H), 6.92 (d,  $J = 8.1$  Hz, 2H), 6.81 (t,  $J = 7.5$  Hz, 1H), 5.80 (m, 2H), 4.69 (s, 2H), 4.52 (d,  $J = 4.3$  Hz, 2H), 4.14 – 4.10 (m, 2H), 3.83 (s, 3H), 3.79 (s, 3H).  $^{13}\text{C}$  NMR (101 MHz,  $\text{CDCl}_3$ )  $\delta$  172.20, 159.28, 158.78, 155.51, 132.74, 129.65, 128.81, 127.91, 127.62, 127.21, 118.73, 118.12, 117.57, 114.36, 67.32, 63.01, 60.40, 55.31, 54.87.

### 3.2 General Procedure for the Allylic Etherification of **1**

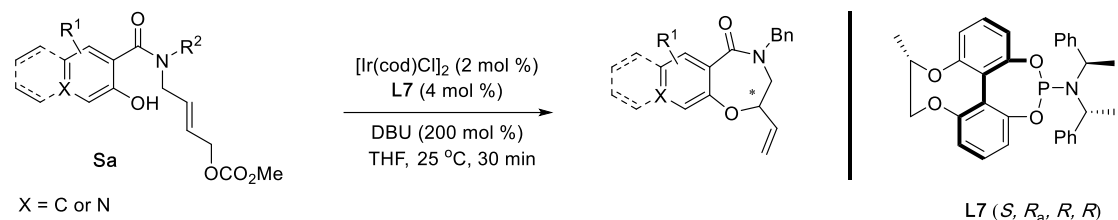

In a dry Schlenk tube filled with argon,  $[\text{Ir}(\text{cod})\text{Cl}]_2$  (2.7 mg, 0.004 mmol, 2 mol %), phosphoramidite ligand **L7** (4.1 mg, 0.008 mmol, 4 mol %), and *n*-propylamine (0.5 mL) were dissolved in THF (1.0 mL). The reaction mixture was heated at 50 °C for 30 min and then the volatile solvents were removed in vacuum to give a yellow solid. In this tube, allylic carbonates **1** (0.2 mmol), DBU (61 mg, 0.4 mmol, 200 mol %) and THF (2.0 mL) were added and stirred at 25 °C until the reaction was complete. Then the solvent was evaporated and the residue was purified by silica gel column chromatography using



petroleum/EtOAc as the eluent to give the desired products. (**2v** is prepared from (**Z**)-**1v** in the same way.)

**(R)-4-Benzyl-2-vinyl-3,4-dihydrobenzo[*f*][1,4]oxazepin-5(2*H*)-one (2a)**

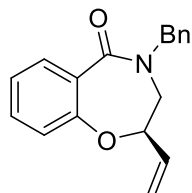

$R_f = 0.50$  (petroleum/EtOAc = 2 : 1, v/v); yellow oil, 53.6 mg, 96% yield; 93% ee [Daicel Chiralcel IF-3 (0.46 cm x 25 cm), *n*-hexane/2-propanol = 80/20,  $\nu = 1.0 \text{ mL} \cdot \text{min}^{-1}$ ,  $T = 25 \text{ }^\circ\text{C}$ ,  $\lambda = 254 \text{ nm}$ ,  $t_R$  (minor) = 12.051 min,  $t_R$  (major) = 12.358 min];  $[\alpha]_D^{25} = +4.3^\circ$  ( $c = 0.70$ ,  $\text{CH}_2\text{Cl}_2$ ).  $^1\text{H NMR}$  (400 MHz,  $\text{CDCl}_3$ )  $\delta$  7.87 (dd,  $J = 7.7, 1.7 \text{ Hz}$ , 1H), 7.47 – 7.42 (m, 1H), 7.40 – 7.35 (m, 4H), 7.35 – 7.29 (m, 1H), 7.23 (td,  $J = 7.6, 1.1 \text{ Hz}$ , 1H), 7.03 (dd,  $J = 8.1, 0.8 \text{ Hz}$ , 1H), 5.83 (ddd,  $J = 17.1, 10.6, 6.3 \text{ Hz}$ , 1H), 5.35 (m, 1H), 5.26 (m, 1H), 5.16 (d,  $J = 14.8 \text{ Hz}$ , 1H), 4.77 – 4.69 (m, 1H), 4.58 (d,  $J = 14.8 \text{ Hz}$ , 1H), 3.40 (m, 2H).  $^{13}\text{C NMR}$  (101 MHz,  $\text{CDCl}_3$ )  $\delta$  168.84, 152.78, 137.01, 134.19, 132.74, 130.76, 128.79, 128.24, 127.75, 124.11, 122.57, 118.24, 84.10, 51.01, 49.60. HRMS (ESI) calcd for  $\text{C}_{18}\text{H}_{17}\text{NO}_2$   $[\text{M}+\text{H}]^+$ : 280.1341, Found: 280.1328.

**(R)-4-Benzyl-8-methyl-2-vinyl-3,4-dihydrobenzo[*f*][1,4]oxazepin-5(2*H*)-one (2b)**

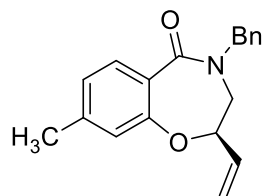

$R_f = 0.50$  (petroleum/EtOAc = 2 : 1, v/v); yellow oil, 55.1 mg, 94% yield; 92% ee [Daicel Chiralcel IF-3 (0.46 cm x 25 cm), *n*-hexane/2-propanol = 80/20,  $\nu = 1.0 \text{ mL} \cdot \text{min}^{-1}$ ,  $T = 25 \text{ }^\circ\text{C}$ ,  $\lambda = 254 \text{ nm}$ ,  $t_R$  (minor) = 13.913 min,  $t_R$  (major) =

15.770 min];  $[\alpha]_D^{25} = +62.6^\circ$  ( $c = 0.70$ ,  $\text{CH}_2\text{Cl}_2$ ).  $^1\text{H}$  NMR (400 MHz,  $\text{CDCl}_3$ )  $\delta$  7.75 (d,  $J = 7.9$  Hz, 1H), 7.43 – 7.31 (m, 5H), 7.09 – 7.00 (m, 1H), 6.88 – 6.78 (m, 1H), 5.82 (ddd,  $J = 17.0, 10.6, 6.3$  Hz, 1H), 5.33 (m, 1H), 5.25 (m, 1H), 5.14 (d,  $J = 14.8$  Hz, 1H), 4.71 (m, 1H), 4.57 (d,  $J = 14.8$  Hz, 1H), 3.39 (m, 2H), 2.38 (s, 3H).  $^{13}\text{C}$  NMR (101 MHz,  $\text{CDCl}_3$ )  $\delta$  168.91, 152.78, 143.58, 137.11, 134.34, 130.72, 128.76, 128.24, 127.69, 125.05, 124.88, 122.84, 118.09, 83.93, 51.01, 49.75, 25.37, 21.34. HRMS (ESI) calcd for  $\text{C}_{19}\text{H}_{19}\text{NO}_2$   $[\text{M}+\text{H}]^+$ : 294.1498, Found: 294.1484.

**(R)-4-Benzyl-7-methyl-2-vinyl-3,4-dihydrobenzo[f][1,4]oxazepin-5(2H)-one (2c)**

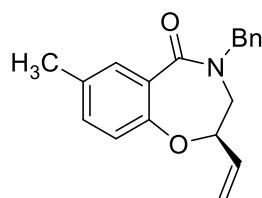

$R_f = 0.50$  (petroleum/EtOAc = 2 : 1, v/v); yellow oil, 58.1 mg, 99% yield; 96% ee [Daicel Chiralcel IA-3 (0.46 cm x 25 cm), *n*-hexane/2-propanol = 93/7,  $v = 1.0$  mL $\cdot$ min $^{-1}$ ,  $T = 25$  °C,  $\lambda = 254$  nm,  $t_R$  (minor) = 19.212 min,  $t_R$  (major) = 18.091 min];  $[\alpha]_D^{25} = +63.7^\circ$  ( $c = 0.70$ ,  $\text{CH}_2\text{Cl}_2$ ).  $^1\text{H}$  NMR (400 MHz,  $\text{CDCl}_3$ )  $\delta$  7.65 (s, 1H), 7.49 – 7.31 (m, 5H), 7.24 (d,  $J = 8.0$  Hz, 1H), 6.93 (d,  $J = 8.2$  Hz, 1H), 5.83 (ddd,  $J = 17.0, 10.2, 6.7$  Hz, 1H), 5.34 (d,  $J = 17.2$  Hz, 1H), 5.25 (d,  $J = 10.6$  Hz, 1H), 5.13 (d,  $J = 14.8$  Hz, 1H), 4.76 – 4.66 (m, 1H), 4.59 (d,  $J = 14.8$  Hz, 1H), 3.37 (m, 2H), 2.38 (s, 3H).  $^{13}\text{C}$  NMR (101 MHz,  $\text{CDCl}_3$ )  $\delta$  169.09, 150.50, 137.11, 134.33, 133.81, 133.38, 130.81, 128.77, 128.21, 128.05, 127.70, 122.37, 118.13, 83.90, 50.96, 49.63, 20.62. HRMS (ESI) calcd for  $\text{C}_{19}\text{H}_{19}\text{NO}_2$   $[\text{M}+\text{H}]^+$ : 294.1498, Found: 294.1483.

**(R)-4-Benzyl-6-methyl-2-vinyl-3,4-dihydrobenzo[f][1,4]oxazepin-5(2H)-one (2d)**

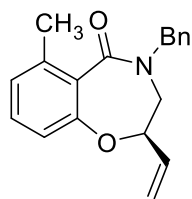

$R_f = 0.50$  (petroleum/EtOAc = 2 : 1, v/v); yellow oil, 55.1 mg, 94% yield; 99% ee [Daicel Chiralcel IA-3 (0.46 cm x 25 cm), *n*-hexane/2-propanol = 90/10,  $\nu = 1.0 \text{ mL} \cdot \text{min}^{-1}$ ,  $T = 25 \text{ }^\circ\text{C}$ ,  $\lambda = 254 \text{ nm}$ ,  $t_R$  (minor) = 13.197 min,  $t_R$  (major) = 11.893 min];  $[\alpha]_D^{25} = +47.7^\circ$  ( $c = 0.70$ ,  $\text{CH}_2\text{Cl}_2$ ).  $^1\text{H NMR}$  (400 MHz,  $\text{CDCl}_3$ )  $\delta$  7.35 (m, 6H), 7.09 (dd,  $J = 7.3, 2.9 \text{ Hz}$ , 1H), 6.87 (dd,  $J = 7.7, 2.9 \text{ Hz}$ , 1H), 5.93 – 5.73 (m, 1H), 5.30 (m, 2H), 5.13 (m, 1H), 4.72 – 4.58 (m, 2H), 3.39 – 3.24 (m, 2H), 2.55 (s, 3H).  $^{13}\text{C NMR}$  (101 MHz,  $\text{CDCl}_3$ )  $\delta$  168.13, 152.11, 139.56, 137.44, 134.26, 130.92, 128.77, 128.00, 127.66, 127.36, 120.40, 118.37, 83.38, 50.07, 48.95, 20.29. HRMS (ESI) calcd for  $\text{C}_{19}\text{H}_{19}\text{NO}_2$   $[\text{M}+\text{H}]^+$ : 294.1498, Found: 294.1483.

**(R)-4-Benzyl-9-methoxy-2-vinyl-3,4-dihydrobenzo[f][1,4]oxazepin-5(2H)-one (2e)**

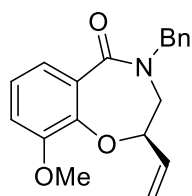

$R_f = 0.40$  (petroleum/EtOAc = 2 : 1, v/v); yellow oil, 59.4 mg, 96% yield; 99% ee [Daicel Chiralcel IA-3 (0.46 cm x 25 cm), *n*-hexane/2-propanol = 90/10,  $\nu = 1.0 \text{ mL} \cdot \text{min}^{-1}$ ,  $T = 25 \text{ }^\circ\text{C}$ ,  $\lambda = 211 \text{ nm}$ ,  $t_R$  (minor) = 24.718 min,  $t_R$  (major) = 23.458 min];  $[\alpha]_D^{25} = +50.0^\circ$  ( $c = 0.80$ ,  $\text{CH}_2\text{Cl}_2$ ).  $^1\text{H NMR}$  (400 MHz,  $\text{CDCl}_3$ )  $\delta$  7.36 (t,  $J = 10.3 \text{ Hz}$ , 6H), 7.18 (t,  $J = 7.5 \text{ Hz}$ , 1H), 7.07 (d,  $J = 8.1 \text{ Hz}$ , 1H), 5.85 (ddd,  $J = 17.1, 10.6, 6.6 \text{ Hz}$ , 1H), 5.35 (d,  $J = 16.9 \text{ Hz}$ , 1H), 5.21 (m, 2H), 4.86 – 4.72 (m, 1H), 4.56 (d,  $J = 14.7 \text{ Hz}$ , 1H), 3.88 (s, 3H), 3.37 (m, 2H).  $^{13}\text{C NMR}$  (101 MHz,  $\text{CDCl}_3$ )  $\delta$  168.81, 152.39, 141.96, 137.09, 134.57, 130.23, 128.77,

128.19, 127.71, 124.47, 121.71, 118.00, 114.96, 84.72, 56.22, 50.92, 49.71.  
HRMS (ESI) calcd for C<sub>19</sub>H<sub>19</sub>NO<sub>3</sub> [M+H]<sup>+</sup>: 310.1447, Found: 310.1432.

**(R)-4-Benzyl-8-methoxy-2-vinyl-3,4-dihydrobenzo[f][1,4]oxazepin-5(2H)-one (2f)**

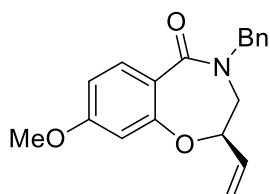

R<sub>f</sub> = 0.40 (petroleum/EtOAc = 2 : 1, v/v); yellow oil, 60.0 mg, 97% yield; 91% ee [Daicel Chiralcel IA-3 (0.46 cm x 25 cm), *n*-hexane/2-propanol = 85/15,  $\nu$  = 1.0 mL•min<sup>-1</sup>, T = 25 °C,  $\lambda$  = 254 nm, t<sub>R</sub> (minor) = 15.317 min, t<sub>R</sub> (major) = 16.151 min]; [ $\alpha$ ]<sub>D</sub><sup>25</sup> = +60.5° (c = 0.80, CH<sub>2</sub>Cl<sub>2</sub>). <sup>1</sup>H NMR (400 MHz, CDCl<sub>3</sub>)  $\delta$  7.84 (d, *J* = 8.7 Hz, 1H), 7.42 – 7.31 (m, 5H), 6.76 (dd, *J* = 8.8, 2.2 Hz, 1H), 6.54 (d, *J* = 2.1 Hz, 1H), 5.83 (ddd, *J* = 17.0, 10.5, 6.3 Hz, 1H), 5.33 (d, *J* = 17.2 Hz, 1H), 5.25 (d, *J* = 10.5 Hz, 1H), 5.14 (d, *J* = 14.7 Hz, 1H), 4.72 (m, 1H), 4.55 (d, *J* = 14.8 Hz, 1H), 3.84 (s, 3H), 3.48 – 3.30 (m, 2H). <sup>13</sup>C NMR (101 MHz, CDCl<sub>3</sub>)  $\delta$  168.64, 163.33, 154.60, 137.16, 134.30, 132.40, 128.76, 128.27, 127.69, 119.92, 118.15, 110.21, 106.99, 84.00, 55.52, 51.14, 49.92. HRMS (ESI) calcd for C<sub>19</sub>H<sub>19</sub>NO<sub>3</sub> [M+H]<sup>+</sup>: 310.1447, Found: 310.1432.

**(R)-4-Benzyl-7-methoxy-2-vinyl-3,4-dihydrobenzo[f][1,4]oxazepin-5(2H)-one (2g)**

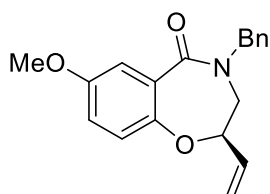

R<sub>f</sub> = 0.50 (petroleum/EtOAc = 2 : 1, v/v); yellow oil, 59.4 mg, 96% yield; 94% ee [Daicel Chiralcel IA-3 (0.46 cm x 25 cm), *n*-hexane/2-propanol = 90/10,  $\nu$  =

1.0 mL•min<sup>-1</sup>, T = 25 °C, λ = 254 nm, t<sub>R</sub> (minor) = 20.603 min, t<sub>R</sub> (major) = 19.327 min]; [α]<sub>D</sub><sup>25</sup> = +61.8° (c = 0.80, CH<sub>2</sub>Cl<sub>2</sub>). <sup>1</sup>H NMR (400 MHz, CDCl<sub>3</sub>) δ 7.43 – 7.32 (m, 6H), 6.98 (m, 2H), 5.82 (ddd, J = 17.1, 10.6, 6.4 Hz, 1H), 5.33 (m, 1H), 5.25 (m, 1.1 Hz, 1H), 5.14 (d, J = 14.8 Hz, 1H), 4.68 (m, 1H), 4.59 (d, J = 14.8 Hz, 1H), 3.85 (s, 3H), 3.37 (m, 2H). <sup>13</sup>C NMR (101 MHz, CDCl<sub>3</sub>) δ 168.86, 156.15, 146.33, 137.06, 134.28, 129.16, 128.78, 128.20, 127.74, 123.69, 119.49, 118.21, 113.68, 83.92, 55.81, 51.03, 49.63. HRMS (ESI) calcd for C<sub>19</sub>H<sub>19</sub>NO<sub>3</sub> [M+H]<sup>+</sup>: 310.1447, Found: 310.1432.

**(R)-4-Benzyl-6-methoxy-2-vinyl-3,4-dihydrobenzo[f][1,4]oxazepin-5(2H)-one (2h)**

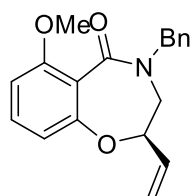

R<sub>f</sub> = 0.40 (petroleum/EtOAc = 2 : 1, v/v); yellow oil, 53.8 mg, 87% yield; 96% ee [Daicel Chiralcel IA-3 (0.46 cm x 25 cm), *n*-hexane/2-propanol = 75/25, ν = 1.0 mL•min<sup>-1</sup>, T = 25 °C, λ = 254 nm, t<sub>R</sub> (minor) = 17.409 min, t<sub>R</sub> (major) = 14.163 min]; [α]<sub>D</sub><sup>25</sup> = +52.9° (c = 0.80, CH<sub>2</sub>Cl<sub>2</sub>). <sup>1</sup>H NMR (400 MHz, CDCl<sub>3</sub>) δ 7.37 (m, 6H), 6.82 (d, J = 8.4 Hz, 1H), 6.65 (d, J = 8.1 Hz, 1H), 5.85 – 5.72 (m, 1H), 5.25 (m, 3H), 4.56 (d, J = 14.9 Hz, 2H), 3.94 (s, 3H), 3.42 (m, 1H), 3.28 (m, 1H). <sup>13</sup>C NMR (101 MHz, ) δ 166.01, 158.76, 152.92, 137.38, 134.21, 131.83, 128.73, 128.31, 127.66, 124.46, 123.97, 119.11, 118.53, 118.36, 115.34, 108.26, 83.56, 56.33, 49.91, 48.90. HRMS (ESI) calcd for C<sub>19</sub>H<sub>19</sub>NO<sub>3</sub> [M+H]<sup>+</sup>: 310.1447, Found: 310.1433.

**(R)-4-Benzyl-8-fluoro-2-vinyl-3,4-dihydrobenzo[f][1,4]oxazepin-5(2H)-one (2i)**

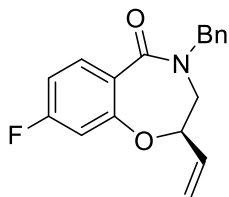

$R_f = 0.60$  (petroleum/EtOAc = 2 : 1, v/v); yellow oil, 58.8 mg, 99% yield; 91% ee [Daicel Chiralcel IA-3 (0.46 cm x 25 cm), *n*-hexane/2-propanol = 85/15,  $\nu = 1.0 \text{ mL} \cdot \text{min}^{-1}$ ,  $T = 25 \text{ }^\circ\text{C}$ ,  $\lambda = 254 \text{ nm}$ ,  $t_R$  (minor) = 9.738 min,  $t_R$  (major) = 9.109 min];  $[\alpha]_D^{25} = +63.1^\circ$  ( $c = 0.70$ ,  $\text{CH}_2\text{Cl}_2$ ).  $^1\text{H NMR}$  (400 MHz,  $\text{CDCl}_3$ )  $\delta$  7.90 (t,  $J = 7.6 \text{ Hz}$ , 1H), 7.46 – 7.31 (m, 5H), 6.93 (t,  $J = 8.2 \text{ Hz}$ , 1H), 6.75 (d,  $J = 9.5 \text{ Hz}$ , 1H), 5.81 (ddd,  $J = 17.0, 10.4, 6.3 \text{ Hz}$ , 1H), 5.30 (m, 2H), 5.15 (d,  $J = 14.8 \text{ Hz}$ , 1H), 4.73 (s, 1H), 4.55 (d,  $J = 14.8 \text{ Hz}$ , 1H), 3.53 – 3.32 (m, 2H).  $^{13}\text{C NMR}$  (101 MHz,  $\text{CDCl}_3$ )  $\delta$  167.87, 165.22 (d,  $J = 251.0 \text{ Hz}$ ), 154.57 (d,  $J = 12.0 \text{ Hz}$ ), 136.84, 133.81, 132.88 (d,  $J = 10.4 \text{ Hz}$ ), 128.83, 128.29, 127.84, 123.88 (d,  $J = 3.2 \text{ Hz}$ ), 118.48, 111.45, 111.23, 109.67, 109.44, 84.29, 51.19, 49.66.  $^{19}\text{F NMR}$  (376 MHz,  $\text{CDCl}_3$ )  $\delta$  -106.79. HRMS (ESI) calcd for  $\text{C}_{18}\text{H}_{16}\text{FNO}_2$   $[\text{M}+\text{H}]^+$ : 298.1246, Found: 298.1234.

**(R)-4-Benzyl-7-fluoro-2-vinyl-3,4-dihydrobenzo[f][1,4]oxazepin-5(2H)-one (2j)**

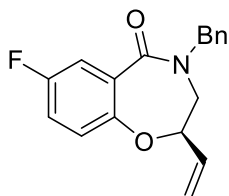

$R_f = 0.60$  (petroleum/EtOAc = 2 : 1, v/v); yellow oil, 55.3 mg, 93% yield; 91% ee [Daicel Chiralcel IA-3 (0.46 cm x 25 cm), *n*-hexane/2-propanol = 95/5,  $\nu = 1.0 \text{ mL} \cdot \text{min}^{-1}$ ,  $T = 25 \text{ }^\circ\text{C}$ ,  $\lambda = 254 \text{ nm}$ ,  $t_R$  (minor) = 19.535 min,  $t_R$  (major) = 18.155 min];  $[\alpha]_D^{25} = +62.3^\circ$  ( $c = 0.70$ ,  $\text{CH}_2\text{Cl}_2$ ).  $^1\text{H NMR}$  (400 MHz,  $\text{CDCl}_3$ )  $\delta$  7.54 (dd,  $J = 8.5, 3.1 \text{ Hz}$ , 1H), 7.43 – 7.30 (m, 5H), 7.13 (td,  $J = 8.3, 3.0 \text{ Hz}$ , 1H), 7.00 (dd,  $J = 8.8, 4.6 \text{ Hz}$ , 1H), 5.81 (ddd,  $J = 17.0, 10.5, 6.3 \text{ Hz}$ , 1H), 5.31 (m,

2H), 5.14 (d,  $J = 14.8$  Hz, 1H), 4.70 (m, 1H), 4.56 (d,  $J = 14.8$  Hz, 1H), 3.50 – 3.28 (m, 2H).  $^{13}\text{C}$  NMR (101 MHz,  $\text{CDCl}_3$ )  $\delta$  167.69, 159.03 (d,  $J = 242.0$  Hz), 148.71 (d,  $J = 2.5$  Hz), 136.77, 133.89, 129.77 (d,  $J = 7.4$  Hz), 128.84, 128.25, 127.86, 124.05 (d,  $J = 8.0$  Hz), 119.59, 119.36, 118.49, 117.02, 116.77, 84.05, 51.10, 49.47.  $^{19}\text{F}$  NMR (376 MHz,  $\text{CDCl}_3$ )  $\delta$  -118.43. HRMS (ESI) calcd for  $\text{C}_{18}\text{H}_{16}\text{FNO}_2$   $[\text{M}+\text{H}]^+$ : 298.1246, Found: 298.1233.

**(R)-4-Benzyl-8-chloro-2-vinyl-3,4-dihydrobenzo[*f*][1,4]oxazepin-5(2*H*)-one**  
**(2k)**

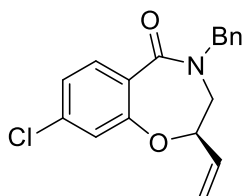

$R_f = 0.60$  (petroleum/EtOAc = 2 : 1, v/v); yellow oil, 60.1 mg, 96% yield; 90% ee [Daicel Chiralcel IA-3 (0.46 cm x 25 cm), *n*-hexane/2-propanol = 85/15,  $\nu = 1.0$  mL $\cdot$ min $^{-1}$ ,  $T = 25$  °C,  $\lambda = 254$  nm,  $t_R$  (minor) = 11.135 min,  $t_R$  (major) = 10.491 min];  $[\alpha]_D^{25} = -74.2^\circ$  ( $c = 0.80$ ,  $\text{CH}_2\text{Cl}_2$ ).  $^1\text{H}$  NMR (400 MHz,  $\text{CDCl}_3$ )  $\delta$  7.82 (d,  $J = 8.4$  Hz, 1H), 7.45 – 7.31 (m, 5H), 7.20 (d,  $J = 8.3$  Hz, 1H), 7.05 (s, 1H), 5.80 (ddd,  $J = 17.0, 10.5, 6.3$  Hz, 1H), 5.31 (m, 2H), 5.14 (d,  $J = 14.7$  Hz, 1H), 4.73 (m, 1H), 4.55 (d,  $J = 14.8$  Hz, 1H), 3.41 (m, 2H).  $^{13}\text{C}$  NMR (101 MHz,  $\text{CDCl}_3$ )  $\delta$  167.83, 153.58, 138.16, 136.74, 133.73, 132.11, 128.85, 128.31, 127.88, 126.26, 124.30, 122.67, 118.58, 84.32, 51.18, 49.58. HRMS (ESI) calcd for  $\text{C}_{18}\text{H}_{16}\text{ClNO}_2$   $[\text{M}+\text{H}]^+$ : 314.0951, Found: 314.0936.

**(R)-4-Benzyl-7-chloro-2-vinyl-3,4-dihydrobenzo[*f*][1,4]oxazepin-5(2*H*)-one**  
**(2l)**

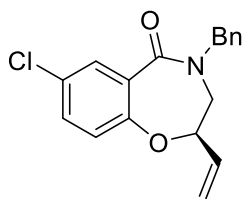

$R_f = 0.60$  (petroleum/EtOAc = 2 : 1, v/v); yellow oil, 60.7 mg, 97% yield; 92% ee [Daicel Chiralcel IA-3 (0.46 cm x 25 cm), *n*-hexane/2-propanol = 93/7,  $\nu = 1.0 \text{ mL} \cdot \text{min}^{-1}$ ,  $T = 25 \text{ }^\circ\text{C}$ ,  $\lambda = 254 \text{ nm}$ ,  $t_R$  (minor) = 15.568 min,  $t_R$  (major) = 14.780 min];  $[\alpha]_D^{25} = -76.9^\circ$  ( $c = 0.80$ ,  $\text{CH}_2\text{Cl}_2$ ).  $^1\text{H NMR}$  (400 MHz,  $\text{CDCl}_3$ )  $\delta$  7.84 (s, 1H), 7.36 (s, 6H), 6.97 (d,  $J = 8.4 \text{ Hz}$ , 1H), 5.90 – 5.71 (m, 1H), 5.31 (m, 2H), 5.13 (d,  $J = 14.4 \text{ Hz}$ , 1H), 4.72 (d,  $J = 4.7 \text{ Hz}$ , 1H), 4.57 (d,  $J = 14.5 \text{ Hz}$ , 1H), 3.55 – 3.25 (m, 2H).  $^{13}\text{C NMR}$  (101 MHz,  $\text{CDCl}_3$ )  $\delta$  167.48, 151.37, 136.69, 133.79, 132.62, 130.55, 129.41, 128.86, 128.27, 127.89, 124.01, 118.55, 84.11, 51.15, 49.46. HRMS (ESI) calcd for  $\text{C}_{18}\text{H}_{16}\text{ClNO}_2$   $[\text{M}+\text{H}]^+$ : 314.0951, Found: 314.0936.

**(R)-4-Benzyl-7-bromo-2-vinyl-3,4-dihydrobenzo[f][1,4]oxazepin-5(2H)-one (2m)**

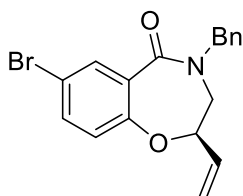

$R_f = 0.60$  (petroleum/EtOAc = 2 : 1, v/v); brown oil, 60.7 mg, 85% yield; 91% ee [Daicel Chiralcel IA-3 (0.46 cm x 25 cm), *n*-hexane/2-propanol = 95/5,  $\nu = 1.0 \text{ mL} \cdot \text{min}^{-1}$ ,  $T = 25 \text{ }^\circ\text{C}$ ,  $\lambda = 254 \text{ nm}$ ,  $t_R$  (minor) = 20.457 min,  $t_R$  (major) = 19.384 min];  $[\alpha]_D^{25} = -67.8^\circ$  ( $c = 0.90$ ,  $\text{CH}_2\text{Cl}_2$ ).  $^1\text{H NMR}$  (400 MHz,  $\text{CDCl}_3$ )  $\delta$  7.98 (d,  $J = 2.6 \text{ Hz}$ , 1H), 7.53 (dd,  $J = 8.5, 2.5 \text{ Hz}$ , 1H), 7.41 – 7.32 (m, 5H), 6.91 (d,  $J = 8.6 \text{ Hz}$ , 1H), 5.79 (ddd,  $J = 17.0, 10.6, 6.3 \text{ Hz}$ , 1H), 5.30 (m, 2H), 5.12 (d,  $J = 14.7 \text{ Hz}$ , 1H), 4.72 (m, 1H), 4.57 (d,  $J = 14.8 \text{ Hz}$ , 1H), 3.47 – 3.29 (m, 2H).



$^{13}\text{C}$  NMR (101 MHz,  $\text{CDCl}_3$ )  $\delta$  167.33, 151.92, 136.68, 135.57, 133.78, 133.53, 129.71, 128.86, 128.27, 127.89, 124.35, 118.54, 116.75, 84.09, 51.17, 49.46. HRMS (ESI) calcd for  $\text{C}_{18}\text{H}_{16}\text{BrNO}_2$   $[\text{M}+\text{H}]^+$ : 358.0446, Found: 358.0432.

**(R)-4-Benzyl-8-nitro-2-vinyl-3,4-dihydrobenzo[f][1,4]oxazepin-5(2H)-one (2n)**

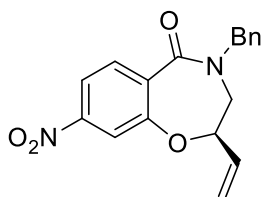

$R_f$  = 0.40 (petroleum/EtOAc = 2 : 1, v/v); yellow oil, 58.3 mg, 90% yield; 84% ee [Daicel Chiralcel IF-3 (0.46 cm x 25 cm), *n*-hexane/2-propanol = 85/15,  $\nu$  = 1.0 mL $\cdot$ min $^{-1}$ , T = 25  $^\circ\text{C}$ ,  $\lambda$  = 254 nm,  $t_R$  (minor) = 22.654 min,  $t_R$  (major) = 19.424 min];  $[\alpha]_D^{25}$  = +21.3 $^\circ$  ( $c$  = 0.50,  $\text{CH}_2\text{Cl}_2$ ).  $^1\text{H}$  NMR (400 MHz,  $\text{CDCl}_3$ )  $\delta$  8.05 (s, 2H), 7.88 (s, 1H), 7.50 – 7.30 (m, 6H), 5.81 (ddd,  $J$  = 16.9, 10.5, 6.2 Hz, 1H), 5.40 – 5.31 (m, 2H), 5.17 (d,  $J$  = 14.7 Hz, 1H), 4.80 (m, 1H), 4.57 (d,  $J$  = 14.7 Hz, 1H), 3.48 – 3.40 (m, 2H).  $^{13}\text{C}$  NMR (101 MHz,  $\text{CDCl}_3$ )  $\delta$  166.68, 153.38, 150.48, 136.27, 133.54, 133.14, 132.27, 128.97, 128.37, 128.11, 119.12, 118.47, 117.99, 84.67, 51.32, 49.28. HRMS (ESI) calcd for  $\text{C}_{18}\text{H}_{16}\text{N}_2\text{O}_4$   $[\text{M}+\text{H}]^+$ : 325.1192, Found: 325.1180.

**(R)-4-Benzyl-8-(trifluoromethyl)-2-vinyl-3,4-dihydrobenzo[f][1,4]oxazepin-5(2H)-one (2o)**

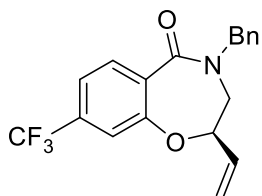

$R_f = 0.40$  (petroleum/EtOAc = 2 : 1, v/v); pale yellow oil, 57.6 mg, 83% yield; 80% ee [Daicel Chiralcel IA-3 (0.46 cm x 25 cm), *n*-hexane/2-propanol = 90/10,  $\nu = 1.0 \text{ mL} \cdot \text{min}^{-1}$ ,  $T = 25 \text{ }^\circ\text{C}$ ,  $\lambda = 254 \text{ nm}$ ,  $t_R$  (minor) = 12.495 min,  $t_R$  (major) = 11.473 min];  $[\alpha]_D^{25} = -49.1^\circ$  ( $c = 0.60$ ,  $\text{CH}_2\text{Cl}_2$ ).  $^1\text{H NMR}$  (400 MHz,  $\text{CDCl}_3$ )  $\delta$  8.00 (d,  $J = 7.7 \text{ Hz}$ , 1H), 7.47 (d,  $J = 8.1 \text{ Hz}$ , 1H), 7.43 – 7.28 (m, 6H), 5.91 – 5.74 (m, 1H), 5.33 (m, 2H), 5.17 (d,  $J = 14.8 \text{ Hz}$ , 1H), 4.84 – 4.71 (m, 1H), 4.57 (d,  $J = 14.6 \text{ Hz}$ , 1H), 3.51 – 3.32 (m, 2H).  $^{13}\text{C NMR}$  (101 MHz,  $\text{CDCl}_3$ )  $\delta$  167.43, 153.05, 136.54, 133.54, 131.88, 131.02, 128.90, 128.32, 127.98, 120.50 (d,  $J = 3.6 \text{ Hz}$ ), 119.77 (d,  $J = 3.7 \text{ Hz}$ ), 118.77, 84.46, 51.22, 49.42.  $^{19}\text{F NMR}$  (376 MHz,  $\text{CDCl}_3$ )  $\delta$  -63.08. HRMS (ESI) calcd for  $\text{C}_{19}\text{H}_{16}\text{F}_3\text{NO}_2$   $[\text{M}+\text{H}]^+$ : 348.1216, Found: 348.1200.

**(*R*)-4-Benzyl-2-vinyl-3,4-dihydronaphtho[2,3-*f*][1,4]oxazepin-5(2*H*)-one**  
**(2p)**

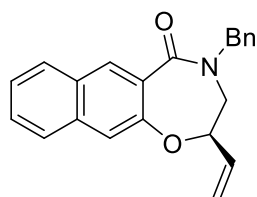

$R_f = 0.60$  (petroleum/EtOAc = 2 : 1, v/v); pale yellow oil, 61.2 mg, 93% yield; 91% ee [Daicel Chiralcel IF-3 (0.46 cm x 25 cm), *n*-hexane/2-propanol = 85/15,  $\nu = 1.0 \text{ mL} \cdot \text{min}^{-1}$ ,  $T = 25 \text{ }^\circ\text{C}$ ,  $\lambda = 254 \text{ nm}$ ,  $t_R$  (minor) = 32.663 min,  $t_R$  (major) = 34.811 min];  $[\alpha]_D^{25} = -19.6^\circ$  ( $c = 0.50$ ,  $\text{CH}_2\text{Cl}_2$ ).  $^1\text{H NMR}$  (400 MHz,  $\text{CDCl}_3$ )  $\delta$  8.39 (s, 1H), 7.94 (d,  $J = 8.1 \text{ Hz}$ , 1H), 7.79 (d,  $J = 8.1 \text{ Hz}$ , 1H), 7.55 (t,  $J = 7.5 \text{ Hz}$ , 1H), 7.52 – 7.44 (m, 2H), 7.38 (dd,  $J = 16.3, 7.7 \text{ Hz}$ , 5H), 5.91 (ddd,  $J = 17.2, 10.5, 6.6 \text{ Hz}$ , 1H), 5.40 (d,  $J = 17.3 \text{ Hz}$ , 1H), 5.31 (d,  $J = 10.6 \text{ Hz}$ , 1H), 5.20 (d,  $J = 14.8 \text{ Hz}$ , 1H), 4.74 (m, 1H), 4.65 (d,  $J = 14.8 \text{ Hz}$ , 1H), 3.50 – 3.33 (m, 2H).  $^{13}\text{C NMR}$  (101 MHz,  $\text{CDCl}_3$ )  $\delta$  168.88, 149.30, 137.11, 135.66, 134.15, 131.45, 130.41, 129.49, 128.82, 128.23, 127.82, 126.92, 125.63, 119.46, 118.50, 83.42,

50.99, 49.42. HRMS (ESI) calcd for C<sub>22</sub>H<sub>19</sub>NO<sub>2</sub> [M+H]<sup>+</sup>: 330.1502, Found: 330.1482.

**(R)-4-Benzyl-2-vinyl-3,4-dihydropyrido[4,3-f][1,4]oxazepin-5(2H)-one (2q)**

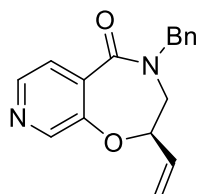

R<sub>f</sub> = 0.30 (petroleum/EtOAc = 2 : 1, v/v); brown oil, 53.2 mg, 95% yield; 81% ee [Daicel Chiralcel IA-3 (0.46 cm x 25 cm), *n*-hexane/2-propanol = 90/10,  $\nu$  = 1.0 mL•min<sup>-1</sup>, T = 25 °C,  $\lambda$  = 254 nm, t<sub>R</sub> (minor) = 19.840 min, t<sub>R</sub> (major) = 18.608 min]; [ $\alpha$ ]<sub>D</sub><sup>25</sup> = -15.0° (c = 0.50, CH<sub>2</sub>Cl<sub>2</sub>). <sup>1</sup>H NMR (400 MHz, )  $\delta$  8.47 (s, 2H), 7.83 (d, *J* = 2.7 Hz, 1H), 7.50 – 7.33 (m, 5H), 5.79 (m, 1H), 5.41 – 5.26 (m, 2H), 5.17 (d, *J* = 14.2 Hz, 1H), 4.80 (s, 1H), 4.54 (d, *J* = 14.5 Hz, 1H), 3.45 (s, 2H). <sup>13</sup>C NMR (101 MHz, CDCl<sub>3</sub>)  $\delta$  166.50, 148.49, 144.77, 144.44, 136.17, 133.29, 132.64, 128.95, 128.40, 128.09, 123.85, 118.75, 84.14, 51.47, 49.67. HRMS (ESI) calcd for C<sub>17</sub>H<sub>16</sub>N<sub>2</sub>O<sub>2</sub> [M+H]<sup>+</sup>: 281.1292, Found: 281.1280.

**(R)-4-Benzyl-8-(thiophen-3-yl)-2-vinyl-3,4-dihydrobenzo[*f*][1,4]oxazepin-5(2H)-one (2r)**

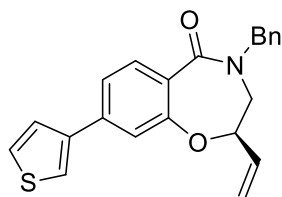

R<sub>f</sub> = 0.60 (petroleum/EtOAc = 2 : 1, v/v); pale yellow oil, 68.6 mg, 95% yield; 92% ee [Daicel Chiralcel IA-3 (0.46 cm x 25 cm), *n*-hexane/2-propanol = 85/15,  $\nu$  = 1.0 mL•min<sup>-1</sup>, T = 25 °C,  $\lambda$  = 254 nm, t<sub>R</sub> (minor) = 22.499 min, t<sub>R</sub> (major) = 26.072 min]; [ $\alpha$ ]<sub>D</sub><sup>25</sup> = -5.7° (c = 0.60, CH<sub>2</sub>Cl<sub>2</sub>). <sup>1</sup>H NMR (400 MHz, CDCl<sub>3</sub>)  $\delta$

7.91 (d,  $J = 8.0$  Hz, 1H), 7.56 (s, 1H), 7.51 – 7.27 (m, 9H), 5.86 (ddd,  $J = 17.0$ , 10.1, 6.7 Hz, 1H), 5.37 (d,  $J = 17.2$  Hz, 1H), 5.28 (d,  $J = 10.5$  Hz, 1H), 5.18 (d,  $J = 14.7$  Hz, 1H), 4.76 (s, 1H), 3.46 (m, 2H).  $^{13}\text{C}$  NMR (101 MHz,  $\text{CDCl}_3$ )  $\delta$  168.57, 153.35, 140.84, 140.31, 137.02, 134.23, 131.54, 128.81, 128.30, 127.77, 126.62, 126.25, 126.14, 121.89, 121.69, 120.03, 118.32, 84.08, 51.14, 49.76. HRMS (ESI) calcd for  $\text{C}_{22}\text{H}_{19}\text{NO}_2\text{S}$   $[\text{M}+\text{H}]^+$ : 362.1223, Found: 362.1205.

**(*R*)-4-Benzyl-8-(furan-2-yl)-2-vinyl-3,4-dihydrobenzo[*f*][1,4]oxazepin-5(2*H*)-one (2s)**

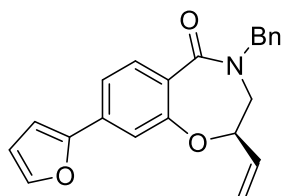

$R_f = 0.60$  (petroleum/EtOAc = 2 : 1, v/v); pale yellow oil, 67.0 mg, 97% yield; 92% ee [Daicel Chiralcel IA-3 (0.46 cm x 25 cm), *n*-hexane/2-propanol = 85/15,  $\nu = 1.0$  mL $\cdot$ min $^{-1}$ ,  $T = 25$  °C,  $\lambda = 254$  nm,  $t_R$  (minor) = 14.863 min,  $t_R$  (major) = 15.557 min];  $[\alpha]_D^{25} = -8.4^\circ$  ( $c = 0.60$ ,  $\text{CH}_2\text{Cl}_2$ ).  $^1\text{H}$  NMR (400 MHz,  $\text{CDCl}_3$ )  $\delta$  7.89 (d,  $J = 8.1$  Hz, 1H), 7.52 (d,  $J = 6.5$  Hz, 2H), 7.45 – 7.28 (m, 6H), 6.77 (s, 1H), 6.52 (s, 1H), 5.86 (ddd,  $J = 17.1$ , 10.5, 6.4 Hz, 1H), 5.36 (d,  $J = 17.2$  Hz, 1H), 5.28 (d,  $J = 10.6$  Hz, 1H), 5.16 (d,  $J = 14.8$  Hz, 1H), 4.75 (s, 1H), 4.58 (d,  $J = 14.8$  Hz, 1H), 3.55 – 3.33 (m, 2H).  $^{13}\text{C}$  NMR (101 MHz,  $\text{CDCl}_3$ )  $\delta$  168.50, 153.35, 152.60, 142.96, 137.01, 135.10, 134.20, 131.47, 128.80, 128.30, 127.77, 126.41, 119.23, 118.31, 117.35, 111.94, 106.99, 84.06, 51.11, 49.72. HRMS (ESI) calcd for  $\text{C}_{22}\text{H}_{19}\text{NO}_3$   $[\text{M}+\text{H}]^+$ : 346.1451, Found: 346.1433.

**(*R*)-4-Benzyl-8-(6-methoxypyridin-3-yl)-2-vinyl-3,4-dihydrobenzo[*f*][1,4]oxazepin-5(2*H*)-one (2t)**

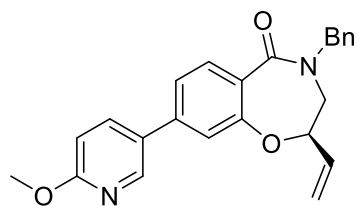

$R_f = 0.60$  (petroleum/EtOAc = 2 : 1, v/v); pale yellow oil, 74.1 mg, 96% yield; 92% ee [Daicel Chiralcel IA-3 (0.46 cm x 25 cm), *n*-hexane/2-propanol = 85/15,  $\nu = 1.0 \text{ mL} \cdot \text{min}^{-1}$ ,  $T = 25 \text{ }^\circ\text{C}$ ,  $\lambda = 254 \text{ nm}$ ,  $t_R$  (minor) = 21.300 min,  $t_R$  (major) = 27.712 min];  $[\alpha]_D^{25} = -6.3^\circ$  ( $c = 0.60$ ,  $\text{CH}_2\text{Cl}_2$ ).  $^1\text{H NMR}$  (400 MHz,  $\text{CDCl}_3$ )  $\delta$  8.43 (d,  $J = 2.4 \text{ Hz}$ , 1H), 7.95 (d,  $J = 8.0 \text{ Hz}$ , 1H), 7.82 (dd,  $J = 8.6, 2.5 \text{ Hz}$ , 1H), 7.42 – 7.31 (m, 6H), 7.20 (d,  $J = 1.5 \text{ Hz}$ , 1H), 6.85 (d,  $J = 8.6 \text{ Hz}$ , 1H), 5.85 (ddd,  $J = 17.0, 10.6, 6.3 \text{ Hz}$ , 1H), 5.36 (d,  $J = 17.2 \text{ Hz}$ , 1H), 5.27 (d,  $J = 10.6 \text{ Hz}$ , 1H), 5.18 (d,  $J = 14.8 \text{ Hz}$ , 1H), 4.77 (m, 1H), 4.58 (d,  $J = 14.8 \text{ Hz}$ , 1H), 4.01 (s, 3H), 3.45 (m, 2H).  $^{13}\text{C NMR}$  (101 MHz,  $\text{CDCl}_3$ )  $\delta$  168.48, 164.07, 153.39, 145.09, 142.51, 137.39, 136.95, 134.10, 131.72, 128.83, 128.53, 128.28, 127.80, 126.51, 122.01, 120.28, 118.40, 111.05, 84.13, 53.74, 51.14, 49.71. HRMS (ESI) calcd for  $\text{C}_{24}\text{H}_{22}\text{N}_2\text{O}_3$   $[\text{M}+\text{H}]^+$ : 387.1719, Found: 387.1698.

**(R)-4-Benzyl-8-(naphthalen-2-yl)-2-vinyl-3,4-dihydrobenzo[f][1,4]oxazepin-5(2H)-one (2u)**

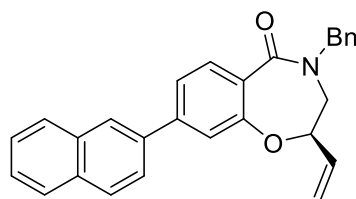

$R_f = 0.60$  (petroleum/EtOAc = 2 : 1, v/v); pale yellow oil, 76.2 mg, 94% yield; 94% ee [Daicel Chiralcel IF-3 (0.46 cm x 25 cm), *n*-hexane/2-propanol = 90/10,  $\nu = 1.0 \text{ mL} \cdot \text{min}^{-1}$ ,  $T = 25 \text{ }^\circ\text{C}$ ,  $\lambda = 254 \text{ nm}$ ,  $t_R$  (minor) = 42.743 min,  $t_R$  (major) = 38.050 min];  $[\alpha]_D^{25} = +22.1^\circ$  ( $c = 0.70$ ,  $\text{CH}_2\text{Cl}_2$ ).  $^1\text{H NMR}$  (400 MHz,  $\text{CDCl}_3$ )  $\delta$  8.01 (d,  $J = 7.8 \text{ Hz}$ , 1H), 7.93 (t,  $J = 9.5 \text{ Hz}$ , 3H), 7.60 – 7.35 (m, 10H), 7.22

(s, 1H), 5.94 – 5.80 (m, 1H), 5.37 (d,  $J = 17.2$  Hz, 1H), 5.25 (m, 2H), 4.80 (s, 1H), 4.64 (d,  $J = 14.8$  Hz, 1H), 3.54 (m, 2H).  $^{13}\text{C}$  NMR (101 MHz,  $\text{CDCl}_3$ )  $\delta$  168.74, 152.77, 145.69, 138.71, 137.05, 134.20, 133.81, 131.20, 130.83, 128.84, 128.38, 128.29, 127.81, 126.83, 126.70, 126.34, 125.97, 125.86, 125.68, 125.32, 124.01, 118.27, 84.11, 51.17, 49.82. HRMS (ESI) calcd for  $\text{C}_{24}\text{H}_{22}\text{N}_2\text{O}_3$   $[\text{M}+\text{H}]^+$ : 406.1807, Found: 406.1794.

**(R)-4-(4-Methoxybenzyl)-2-vinyl-3,4-dihydrobenzo[f][1,4]oxazepin-5(2H)-one (2v)**

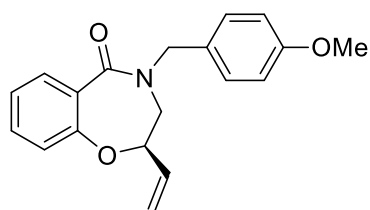

**Trans-substrate:**  $R_f = 0.60$  (petroleum/EtOAc = 2 : 1, v/v); pale yellow oil, 57.5 mg, 93% yield; 90% ee [Daicel Chiralcel IA-3 (0.46 cm x 25 cm), *n*-hexane/2-propanol = 95/5,  $\nu = 1.0$  mL $\cdot$ min $^{-1}$ ,  $t = 25$   $^\circ\text{C}$ ,  $\lambda = 254$  nm,  $t_R$  (minor) = 35.879 min,  $t_R$  (major) = 33.676 min];  $[\alpha]_D^{25} = +4.5^\circ$  ( $c = 0.50$ ,  $\text{CH}_2\text{Cl}_2$ ). **Cis-substrate:**  $R_f = 0.60$  (petroleum/EtOAc = 2 : 1, v/v); pale yellow oil, 58.7 mg, 95% yield; -73% ee [Daicel Chiralcel IA-3 (0.46 cm x 25 cm), *n*-hexane/2-propanol = 95/5,  $\nu = 1.0$  mL $\cdot$ min $^{-1}$ ,  $t = 25$   $^\circ\text{C}$ ,  $\lambda = 254$  nm,  $t_R$  (minor) = 34.931 min,  $t_R$  (major) = 36.551 min];  $[\alpha]_D^{25} = -4.1^\circ$  ( $c = 0.50$ ,  $\text{CH}_2\text{Cl}_2$ ).  $^1\text{H}$  NMR (400 MHz,  $\text{CDCl}_3$ )  $\delta$  7.85 (d,  $J = 7.6$  Hz, 1H), 7.44 (t,  $J = 7.6$  Hz, 1H), 7.31 (d,  $J = 8.4$  Hz, 2H), 7.22 (t,  $J = 7.4$  Hz, 1H), 7.03 (d,  $J = 8.1$  Hz, 1H), 6.91 (d,  $J = 8.0$  Hz, 2H), 5.82 (ddd,  $J = 17.0, 10.2, 6.6$  Hz, 1H), 5.35 (d,  $J = 17.3$  Hz, 1H), 5.26 (d,  $J = 10.6$  Hz, 1H), 5.12 (d,  $J = 14.6$  Hz, 1H), 4.70 (s, 1H), 4.49 (d,  $J = 14.6$  Hz, 1H), 3.83 (s, 3H), 3.47 – 3.30 (m, 2H).  $^{13}\text{C}$  NMR (101 MHz,  $\text{CDCl}_3$ )  $\delta$  168.72, 159.25, 152.76, 134.28, 132.66, 130.76, 129.67, 129.12, 128.36, 124.06, 122.54, 118.15, 114.17,

55.31, 50.45, 49.40. HRMS (ESI) calcd for C<sub>19</sub>H<sub>19</sub>NO<sub>3</sub> [M+H]<sup>+</sup>: 310.1393, Found: 310.1433.

### 3.3 Gram-scale Reaction

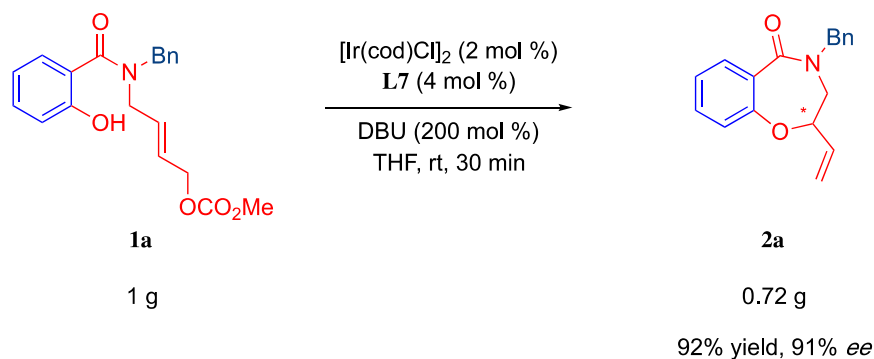

Representative Procedure: in a dry Schlenk tube (50.0 mL) filled with argon, [Ir(cod)Cl]<sub>2</sub> (37.8 mg, 0.056 mmol, 2 mol %), ligand **L7** (57.6 mg, 0.113 mmol, 4 mol %), and *n*-propylamine (5.0 mL) were dissolved in THF (10.0 mL). The reaction mixture was heated at 50 °C for 30 min and then the volatile solvents were removed in vacuum to give a yellow solid. In glove box, substrate (1 g, 2.82 mmol), DBU (0.857g, 5.64 mmol, 200 mol %) and solvent (20.0 mL) were added into the above tube and stirred at 25 °C until the reaction was complete. Then the solvent was evaporated and the residue was purified by silica gel column chromatography using petroleum/EtOAc as the eluent to give the desired product (92% yield, 91% ee).

### 3.4 Procedure for the Synthesis of 3v

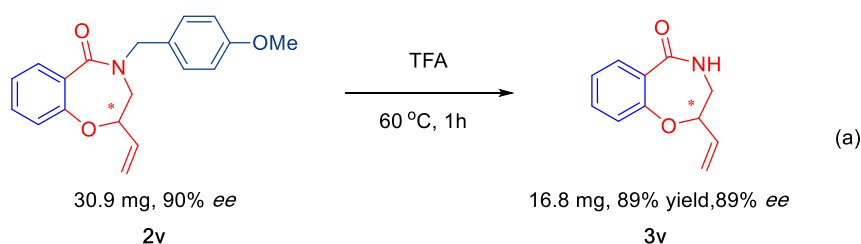

In a dry Schlenk tube filled with argon, **2v** (30.9 mg, 0.1 mmol) was dissolved in excessive TFA (10 mL). The reaction mixture was heated at 60 °C for 1 h. Then the crude reaction mixture was diluted with DCM (10 mL) and washed with saturated sodium bicarbonate solution (10 mL x 3) and brine (10 mL x 3). The combined organic layers were dried over Na<sub>2</sub>SO<sub>4</sub>. Afterwards, the solvents were removed under reduced pressure. The residue was purified by silica gel column chromatography (petroleum/EtOAc = 1 : 1) to afford the desired products **3v** (89% yield, 89% ee).

**(R)-2-Vinyl-3,4-dihydrobenzo[*f*][1,4]oxazepin-5(2*H*)-one (3v)**

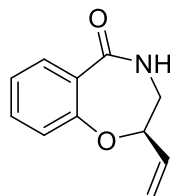

R<sub>f</sub> = 0.10 (petroleum/EtOAc = 2 : 1, v/v); black oil, 16.8 mg, 89% yield; 89% ee [Daicel Chiralcel IF-3 (0.46 cm x 25 cm), *n*-hexane/2-propanol = 95/5,  $\nu$  = 1.0 mL•min<sup>-1</sup>, T = 25 °C,  $\lambda$  = 254 nm, t<sub>R</sub> (minor) = 31.262 min, t<sub>R</sub> (major) = 32.378 min]; [ $\alpha$ ]<sub>D</sub><sup>25</sup> = +12.6° (c = 0.30, CH<sub>2</sub>Cl<sub>2</sub>). <sup>1</sup>H NMR (400 MHz, CDCl<sub>3</sub>)  $\delta$  7.85 (d, *J* = 7.6 Hz, 1H), 7.48 (t, *J* = 7.6 Hz, 1H), 7.32 – 7.18 (m, 2H), 7.09 (d, *J* = 8.1 Hz, 1H), 6.05 – 5.89 (m, 1H), 5.48 (d, *J* = 17.1 Hz, 1H), 5.35 (d, *J* = 10.6 Hz, 1H), 4.94 (s, 1H), 3.50 (d, *J* = 14.5 Hz, 1H), 3.40 – 3.27 (m, 1H). <sup>13</sup>C NMR (101 MHz, CDCl<sub>3</sub>)  $\delta$  171.17, 154.03, 134.26, 133.29, 130.86, 126.11, 123.77, 122.55, 118.39, 84.44, 44.63. HRMS (ESI) calcd for C<sub>11</sub>H<sub>11</sub>NO<sub>2</sub> [M+H]<sup>+</sup>: 190.0863, Found: 190.0859.



### 3.5 Procedure for the Synthesis of 3a

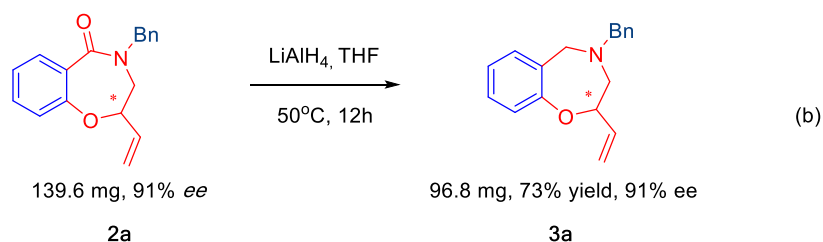

To a solution of **2a** (139.6 mg, 0.5 mmol) in THF (10 mL) at 0 °C, LiAlH<sub>4</sub> (114 mg, 3 mmol) was added in three portions. The reaction mixture was stirred for 12 h at 50 °C. It was cooled back down to 0 °C and MeOH was added. Then the mixture was filtered through celite and the obtained solution was concentrated in vacuo. The crude residue was purified using column chromatography (eluent: petroleum ether/EtOAc = 2 : 1) to provide the desired product **3a** (73% yield, 91% ee).

#### (*R*)-4-Benzyl-2-vinyl-2,3,4,5-tetrahydrobenzo[*f*][1,4]oxazepine (**3a**)

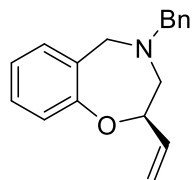

R<sub>f</sub> = 0.30 (petroleum/EtOAc = 2 : 1, v/v); yellow oil, 96.8 mg, 73% yield; 91% ee [Daicel Chiralcel IF-3 (0.46 cm x 25 cm), *n*-hexane/2-propanol = 99.5/0.5,  $\nu$  = 1.0 mL•min<sup>-1</sup>, T = 25 °C,  $\lambda$  = 254 nm, t<sub>R</sub> (minor) = 5.744 min, t<sub>R</sub> (major) = 5.327 min]; [ $\alpha$ ]<sub>D</sub><sup>25</sup> = -9.5° (c = 0.40, CH<sub>2</sub>Cl<sub>2</sub>). <sup>1</sup>H NMR (400 MHz, CDCl<sub>3</sub>)  $\delta$  7.42 – 7.24 (m, 6H), 7.14 – 7.00 (m, 3H), 5.94 (ddd, *J* = 16.0, 10.7, 5.2 Hz, 1H), 5.46 (m, 1H), 5.27 (m, 1H), 4.52 (d, *J* = 3.6 Hz, 1H), 4.08 (d, *J* = 14.2 Hz, 1H), 3.70 (m, 3H), 3.09 (m, 2H). <sup>13</sup>C NMR (101 MHz, CDCl<sub>3</sub>)  $\delta$  158.76, 138.43, 136.37, 131.97, 130.59, 128.99, 128.66, 128.40, 127.27, 123.58, 121.26, 116.03, 78.92, 62.41, 58.24, 56.97. HRMS (ESI) calcd for C<sub>18</sub>H<sub>19</sub>NO [M+H]<sup>+</sup>: 266.1539, Found: 266.1535.

### 3.6 Procedure for the Synthesis of 4a

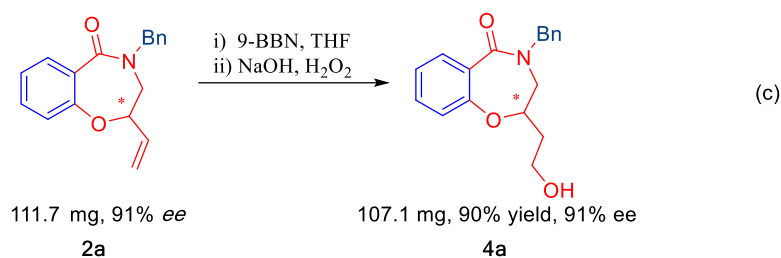

A flame dried Schlenk tube was cooled to room temperature and filled with argon. To this flask **2a** (111.7 mg, 0.4 mmol) and 9-BBN (0.5 M in THF, 2.4 mL, 1.2 mmol) were added. The reaction mixture was heated at 50 °C for 2 hours until the starting material was consumed completely (monitored by TLC). Then the reaction mixture was cooled to 0 °C, 3 M aqueous NaOH (0.8 mL) solution was added. After 5 min, 30% H<sub>2</sub>O<sub>2</sub> (0.6 mL) was added by syringe. After stirring for an additional 3 hours at room temperature, saturated aqueous Na<sub>2</sub>SO<sub>3</sub> solution was added, then the reaction mixture was extracted with EtOAc (10 mL x 3). The combined organic layers were washed with brine, separated, dried over Na<sub>2</sub>SO<sub>4</sub> and concentrated by rotary evaporation. Then the residue was purified by silica gel column chromatography (PE/EA = 1/1) to afford the desired product **4a** (90% yield, 91% ee).

#### **(R)-4-Benzyl-2-(2-hydroxyethyl)-3,4-dihydrobenzo[f][1,4]oxazepin-5(2H)-one (4a)**

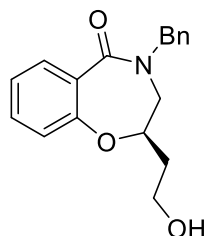

R<sub>f</sub> = 0.10 (petroleum/EtOAc = 2 : 1, v/v); white solid, 107.1 mg, 90% yield; 91% ee [Daicel Chiralcel IA-3 (0.46 cm x 25 cm), *n*-hexane/2-propanol =

80/20,  $\nu = 1.0 \text{ mL} \cdot \text{min}^{-1}$ ,  $T = 25 \text{ }^\circ\text{C}$ ,  $\lambda = 254 \text{ nm}$ ,  $t_{\text{R}} (\text{minor}) = 13.672 \text{ min}$ ,  $t_{\text{R}} (\text{major}) = 12.821 \text{ min}$ ];  $[\alpha]_{\text{D}}^{25} = +3.7^\circ$  ( $c = 0.50$ ,  $\text{CH}_2\text{Cl}_2$ ).  $^1\text{H NMR}$  (400 MHz,  $\text{CDCl}_3$ )  $\delta$  7.86 (d,  $J = 7.6 \text{ Hz}$ , 1H), 7.49 – 7.31 (m, 6H), 7.22 (t,  $J = 7.4 \text{ Hz}$ , 1H), 6.98 (d,  $J = 8.0 \text{ Hz}$ , 1H), 5.01 (d,  $J = 14.8 \text{ Hz}$ , 1H), 4.72 (d,  $J = 14.8 \text{ Hz}$ , 1H), 4.50 (s, 1H), 3.85 (m, 2H), 3.40 – 3.28 (m, 2H), 1.91 (s, 2H).  $^{13}\text{C NMR}$  (101 MHz,  $\text{CDCl}_3$ )  $\delta$  168.94, 152.36, 137.07, 132.69, 130.84, 128.79, 128.45, 128.21, 127.74, 124.11, 122.55, 81.69, 59.41, 51.03, 50.03, 34.57. HRMS (ESI) calcd for  $\text{C}_{18}\text{H}_{19}\text{NO}_3$   $[\text{M}+\text{H}]^+$ : 298.1438, Found: 298.1433.

## 4. Copies of NMR Spectra

Figure 1.  $^1\text{H}$  NMR (400 MHz,  $\text{CDCl}_3$ ) spectrum of 1a

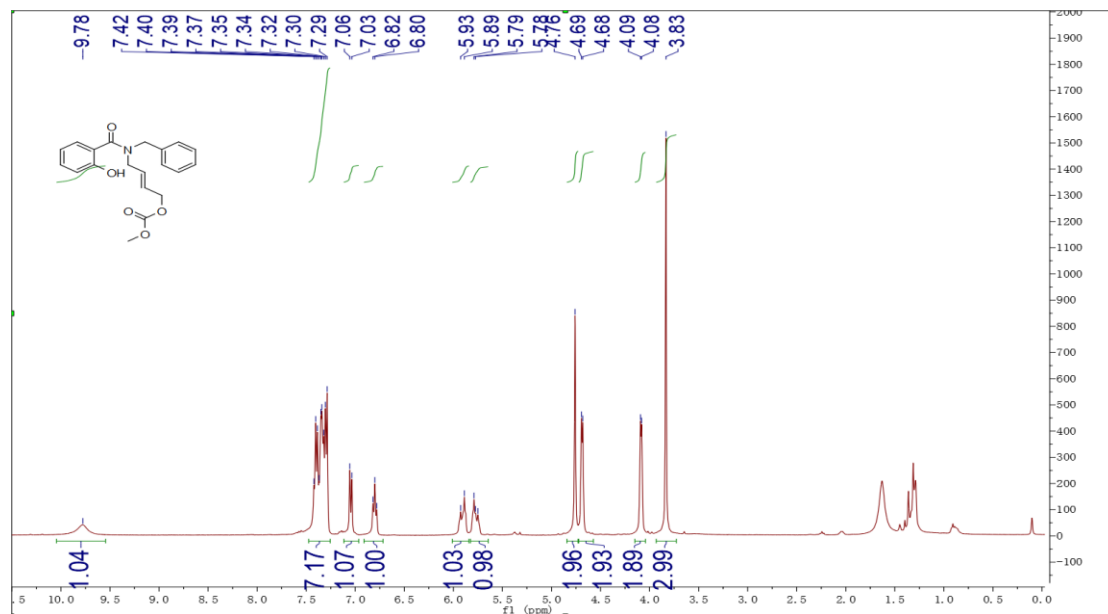

Figure 2.  $^{13}\text{C}$  NMR (100 MHz,  $\text{CDCl}_3$ ) spectrum of 1a

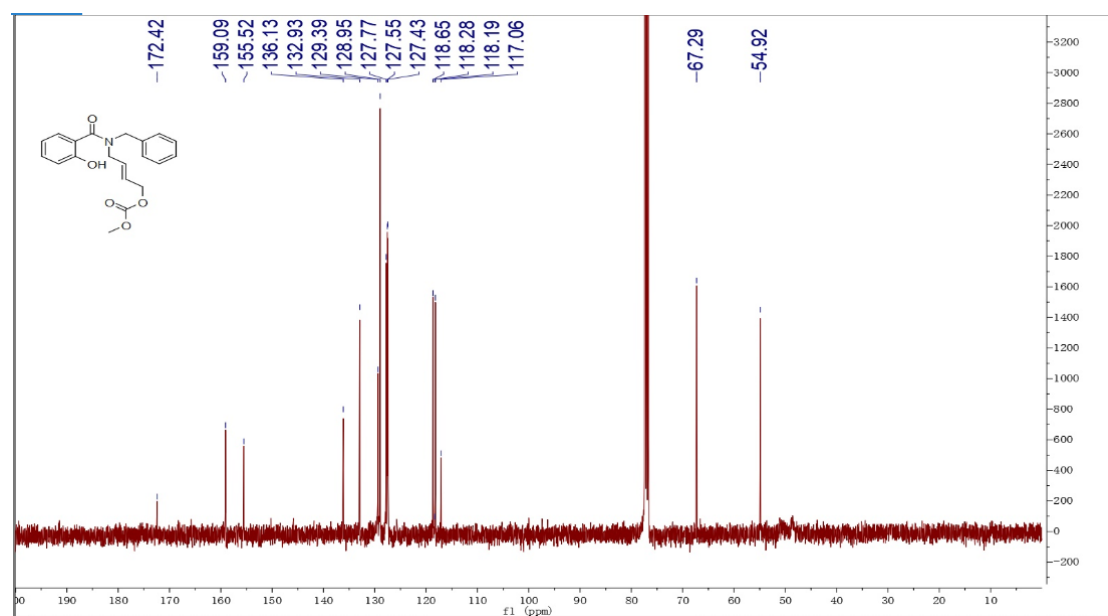

**Figure 3.**  $^1\text{H}$  NMR (400 MHz,  $\text{CDCl}_3$ ) spectrum of **1b**

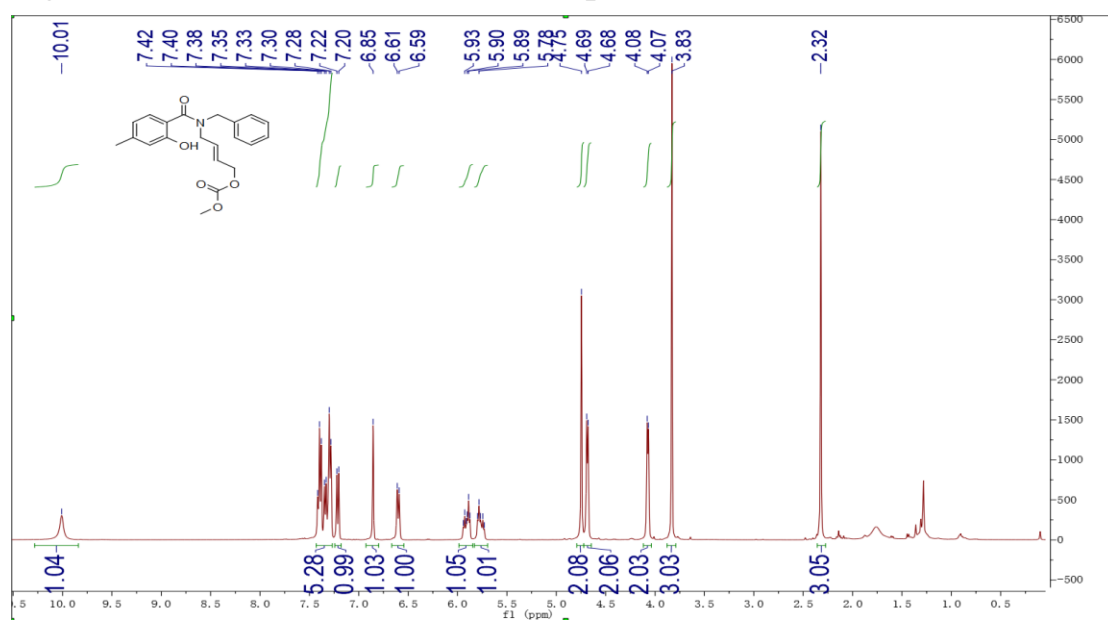

**Figure 4.**  $^{13}\text{C}$  NMR (100 MHz,  $\text{CDCl}_3$ ) spectrum of **1b**

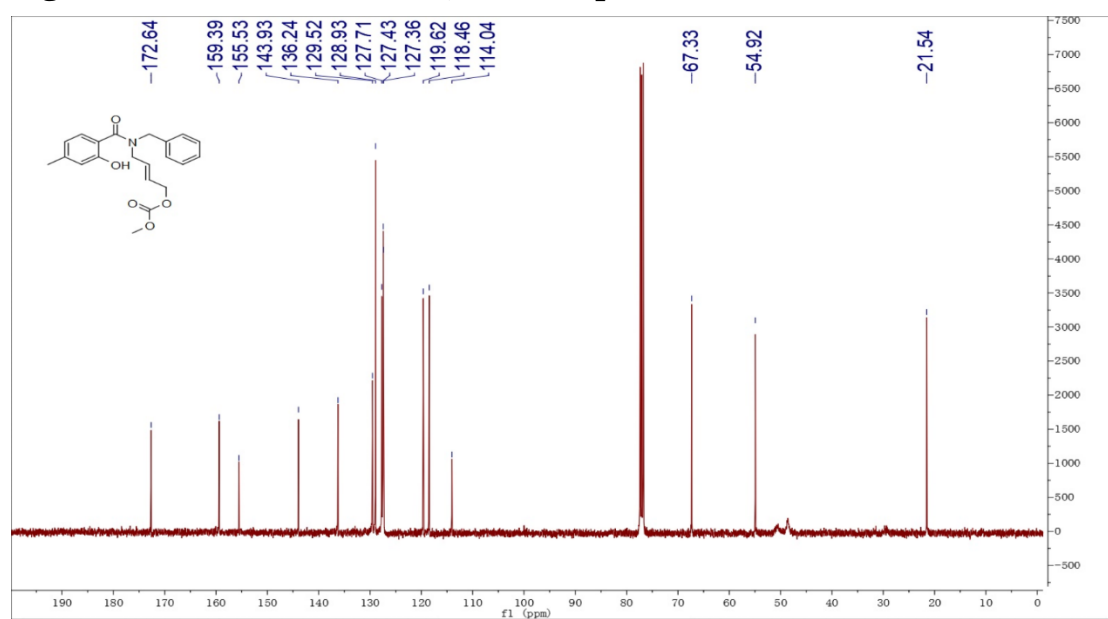

Figure 5. <sup>1</sup>H NMR (400 MHz, CDCl<sub>3</sub>) spectrum of 1c

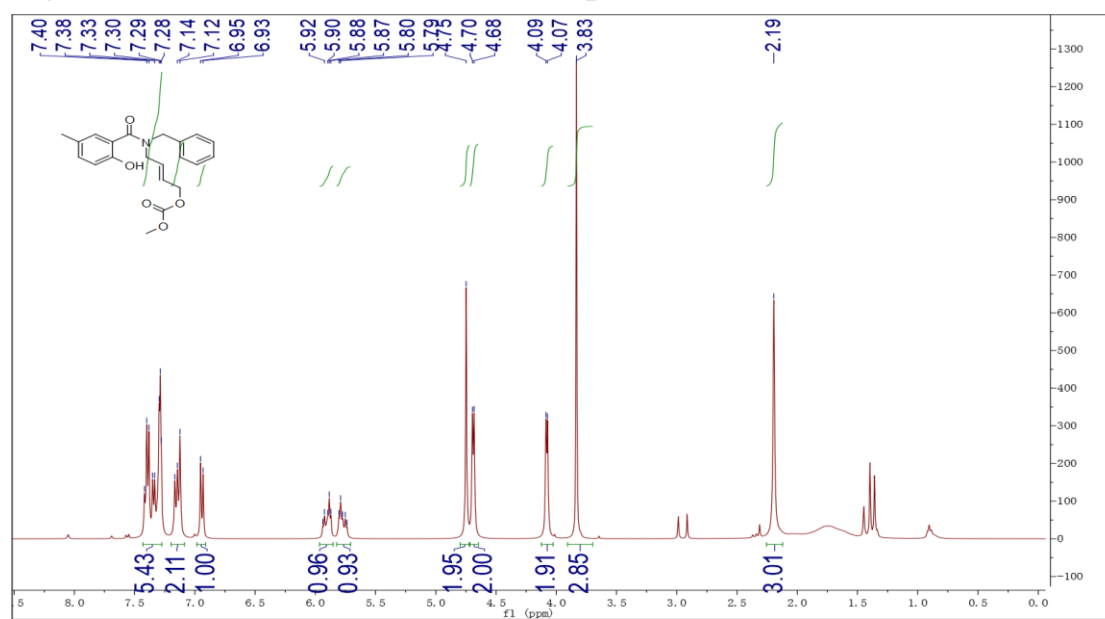

Figure 6. <sup>13</sup>C NMR (100 MHz, CDCl<sub>3</sub>) spectrum of 1c

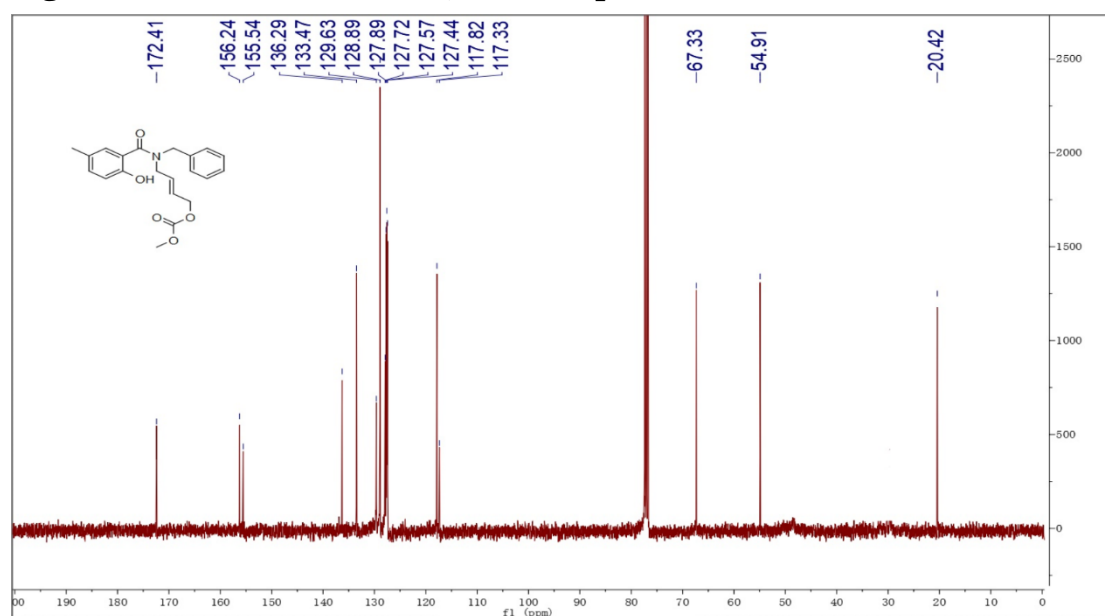

Figure 7.  $^1\text{H}$  NMR (400 MHz,  $\text{CDCl}_3$ ) spectrum of 1d

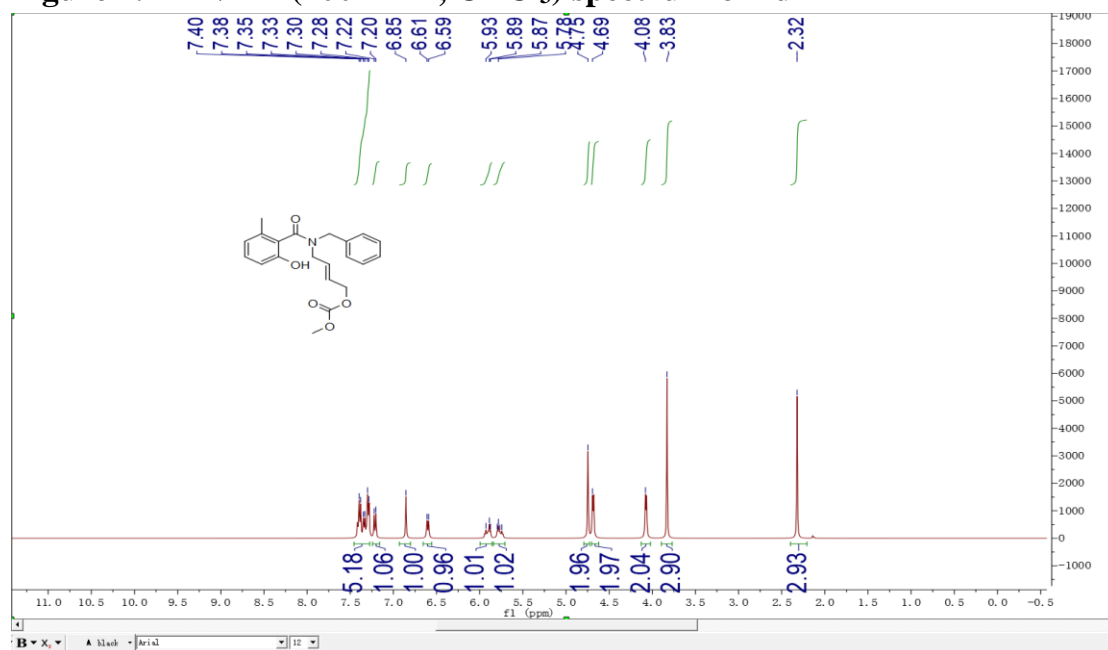

Figure 8.  $^{13}\text{C}$  NMR (100 MHz,  $\text{CDCl}_3$ ) spectrum of 1d

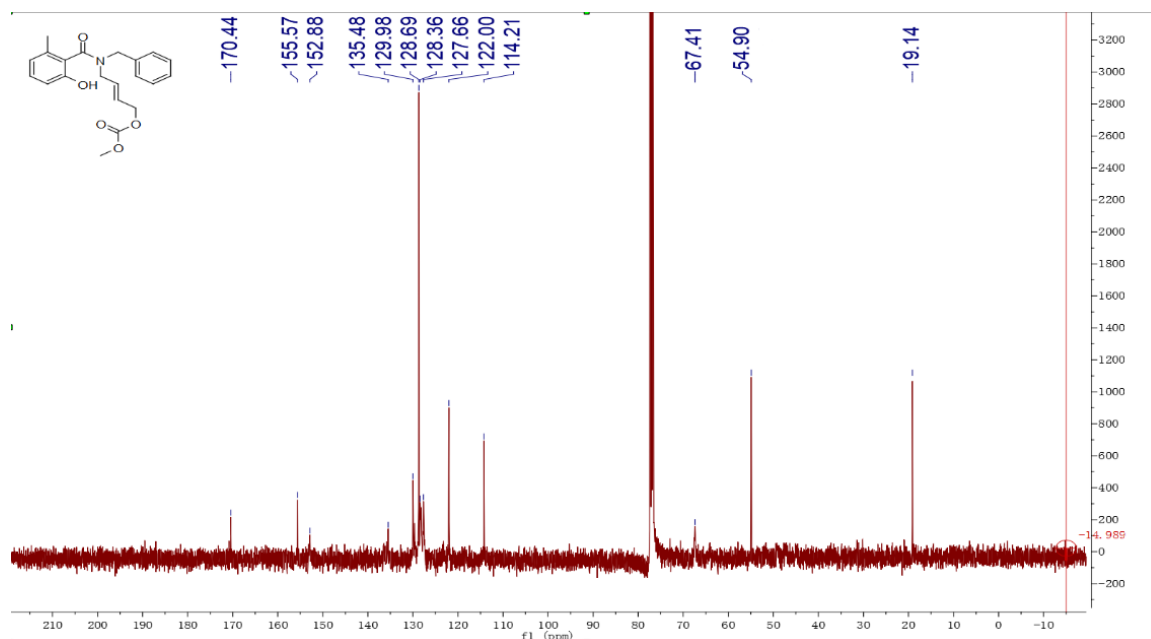

Figure 9.  $^1\text{H}$  NMR (400 MHz,  $\text{CDCl}_3$ ) spectrum of **1e**

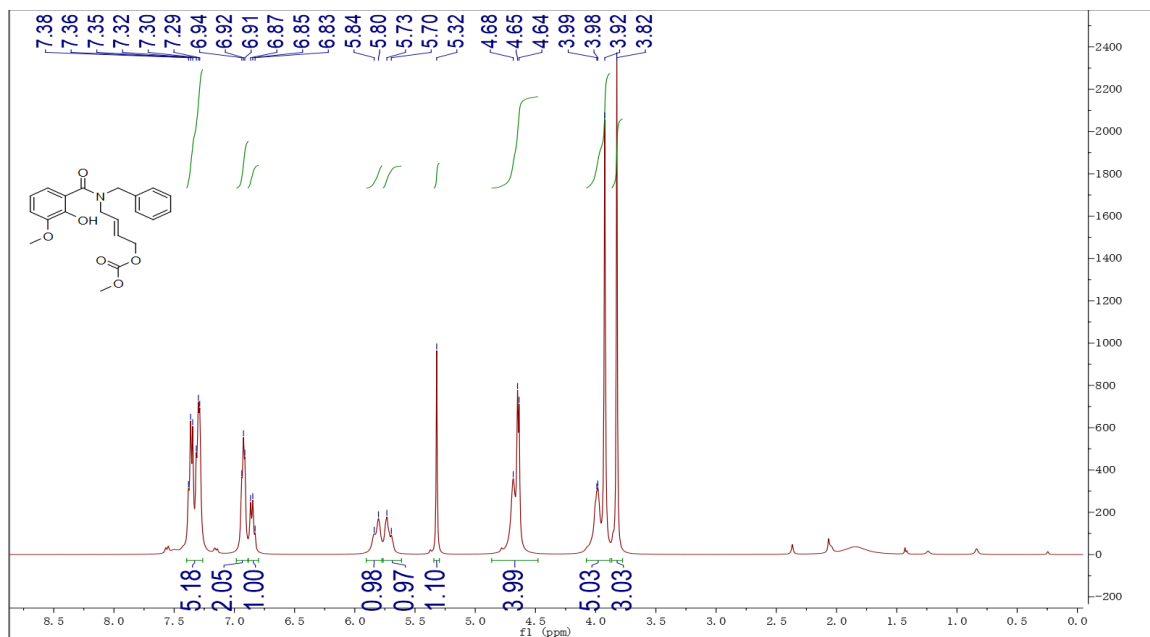

Figure 10.  $^{13}\text{C}$  NMR (100 MHz,  $\text{CDCl}_3$ ) spectrum of **1e**

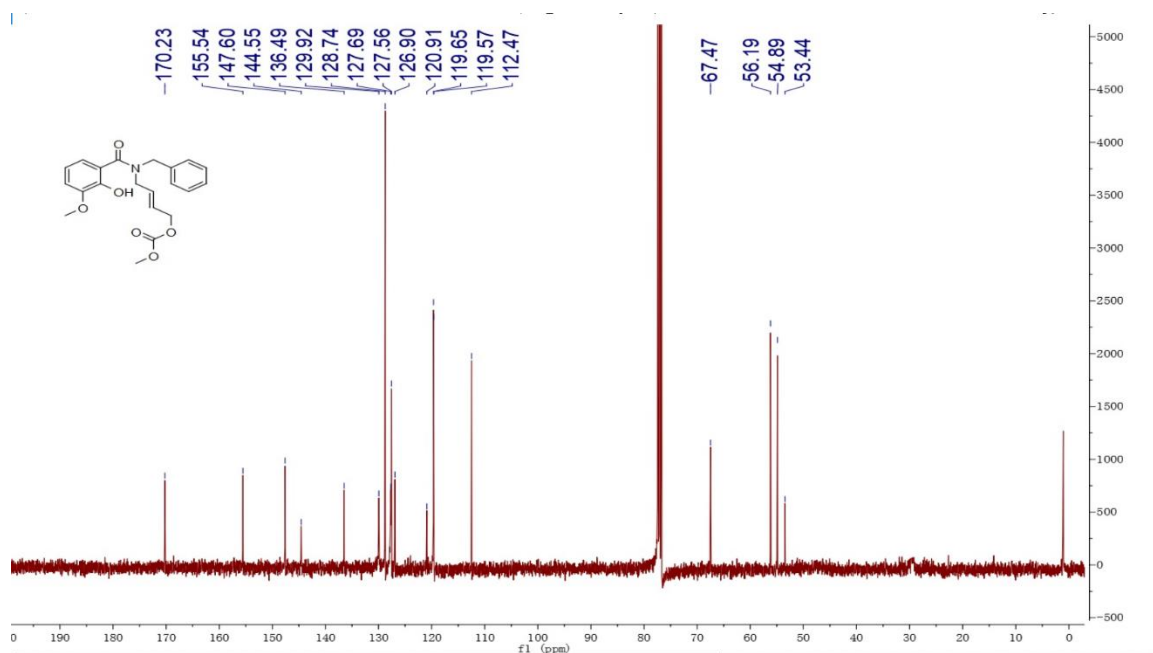



Figure 11.  $^1\text{H}$  NMR (400 MHz,  $\text{CDCl}_3$ ) spectrum of 1f

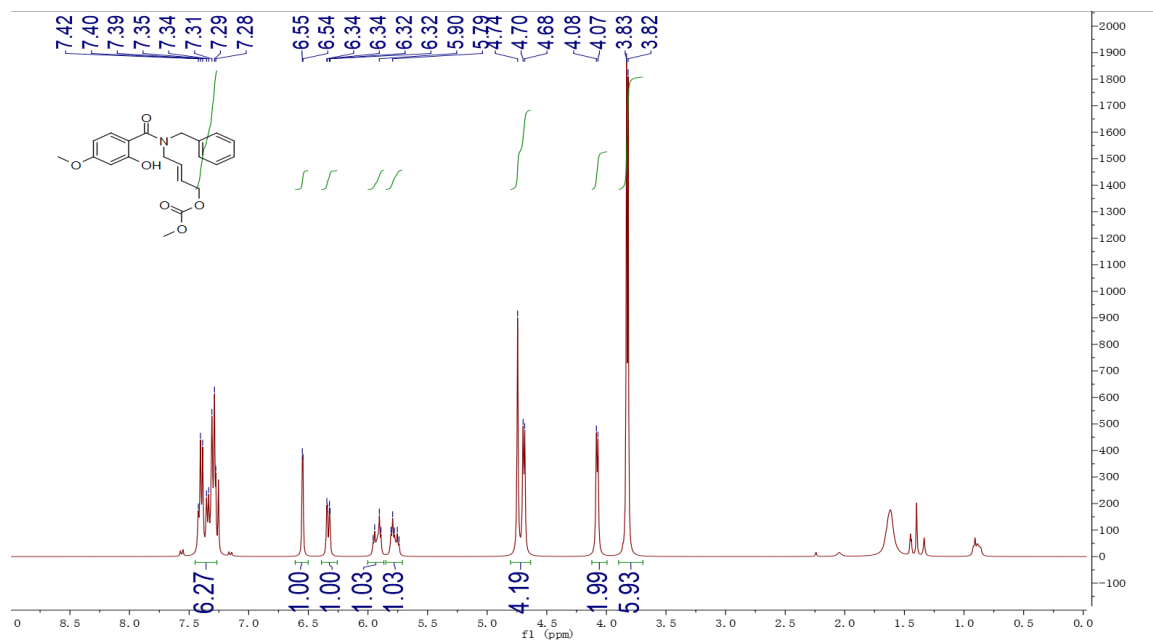

Figure 12.  $^{13}\text{C}$  NMR (100 MHz,  $\text{CDCl}_3$ ) spectrum of 1f

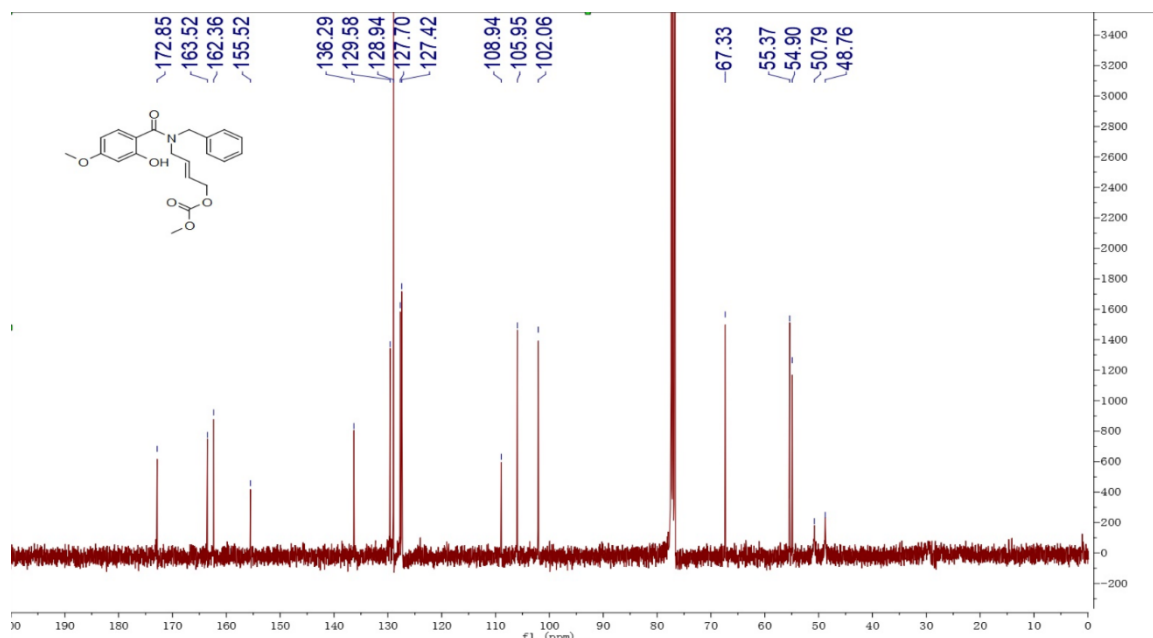

Figure 13.  $^1\text{H}$  NMR (400 MHz,  $\text{CDCl}_3$ ) spectrum of **1g**

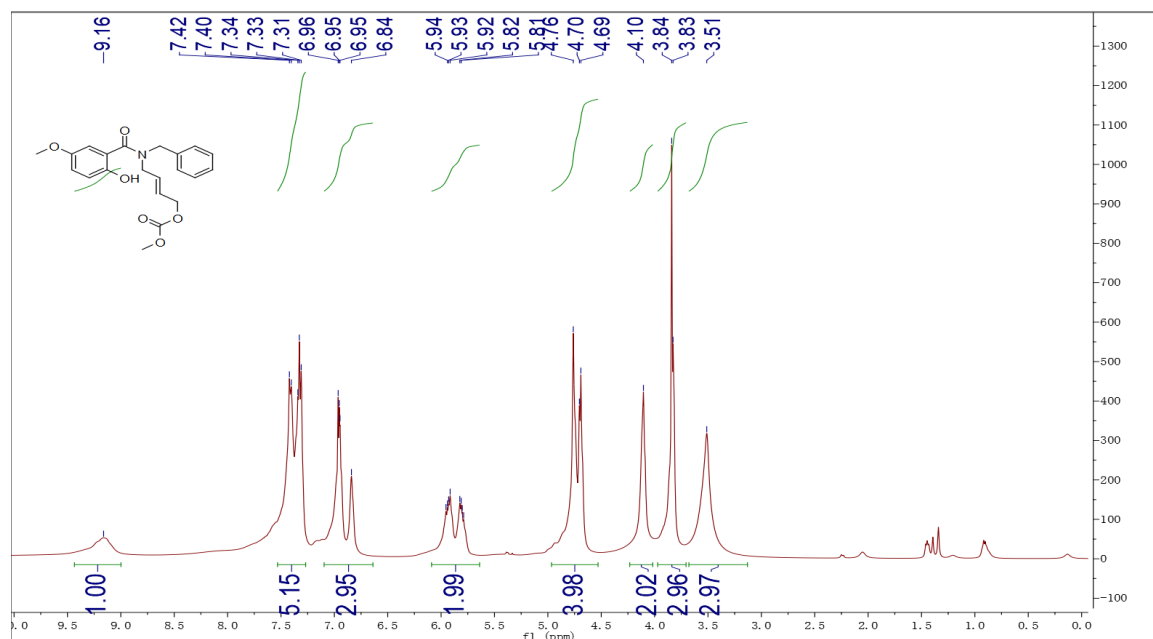

Figure 14.  $^{13}\text{C}$  NMR (100 MHz,  $\text{CDCl}_3$ ) spectrum of **1g**

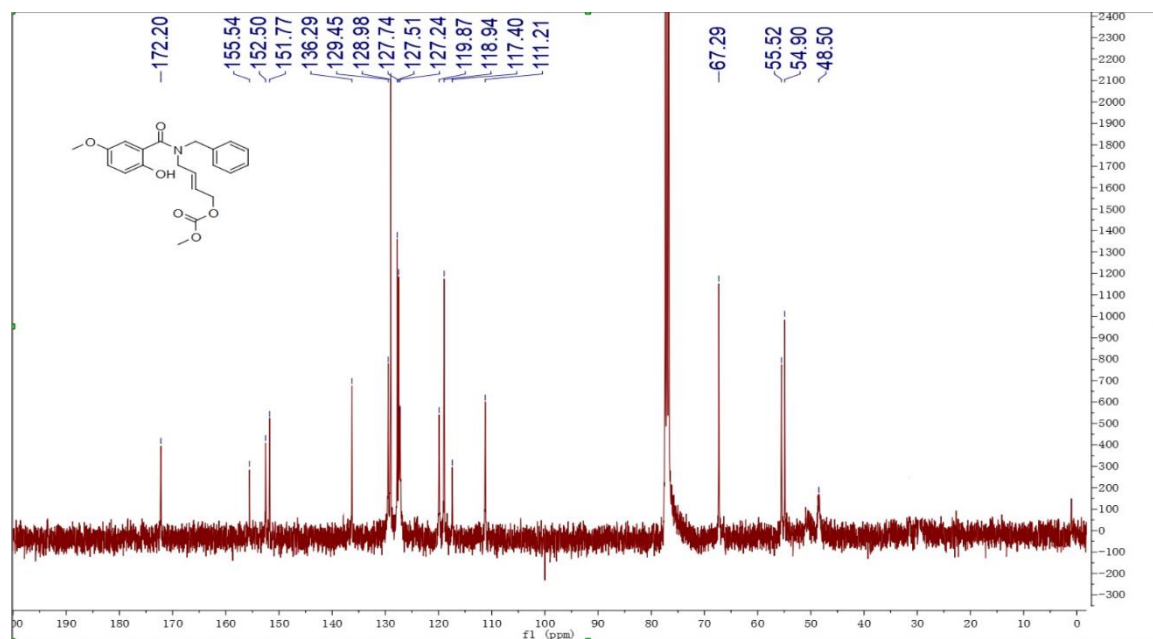

Figure 15.  $^1\text{H}$  NMR (400 MHz,  $\text{CDCl}_3$ ) spectrum of **1h**

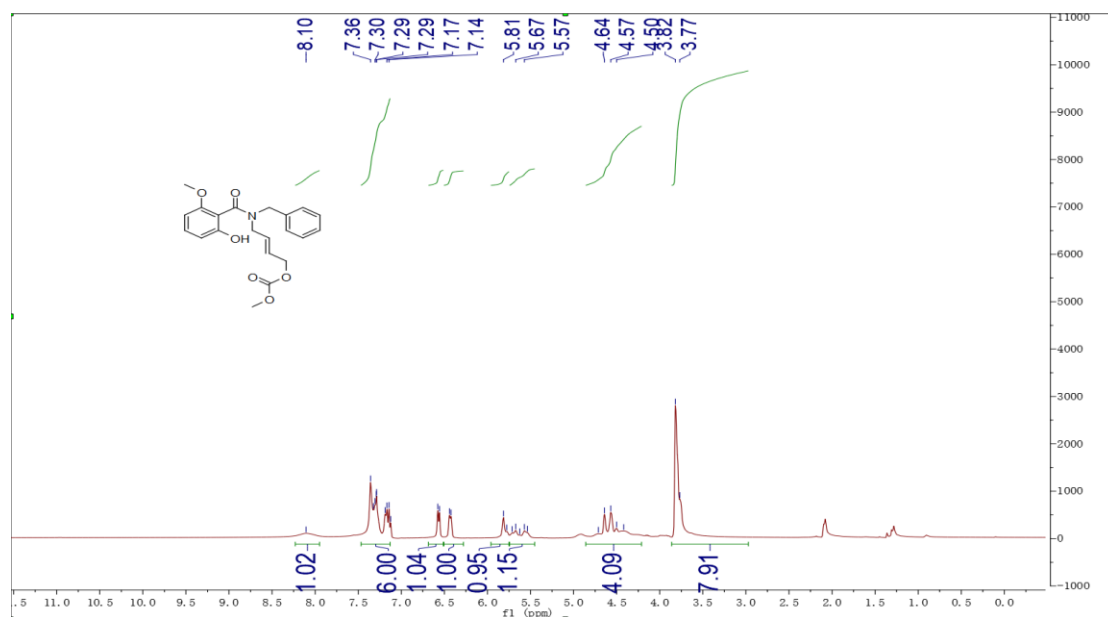

Figure 16.  $^{13}\text{C}$  NMR (100 MHz,  $\text{CDCl}_3$ ) spectrum of **1h**

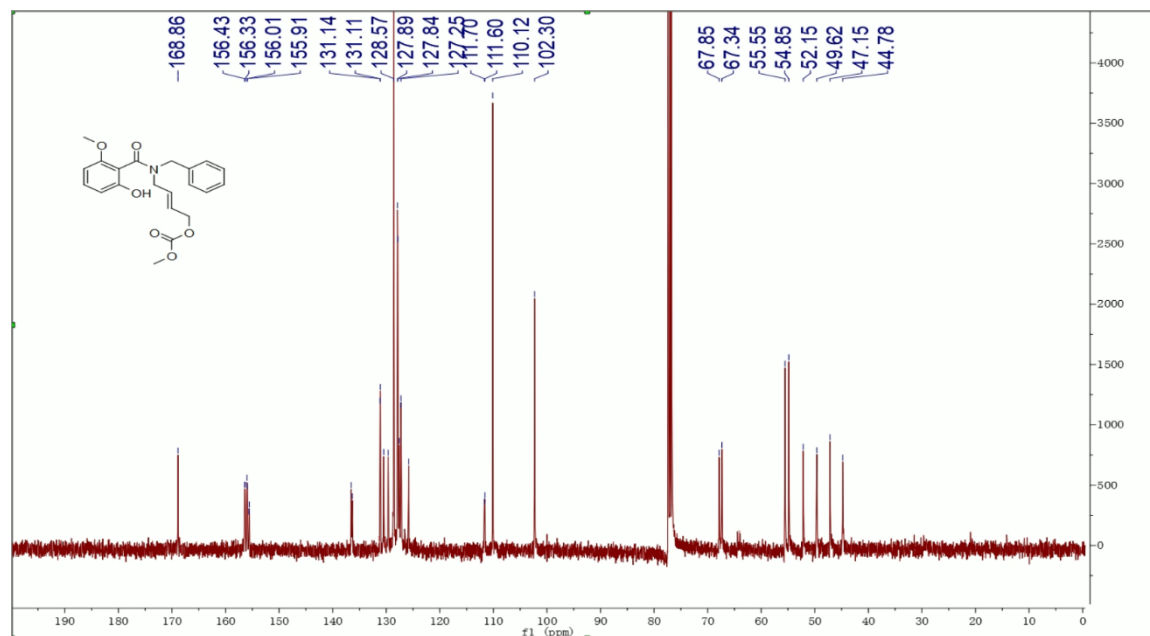

Figure 17.  $^1\text{H}$  NMR (400 MHz,  $\text{CDCl}_3$ ) spectrum of **1i**

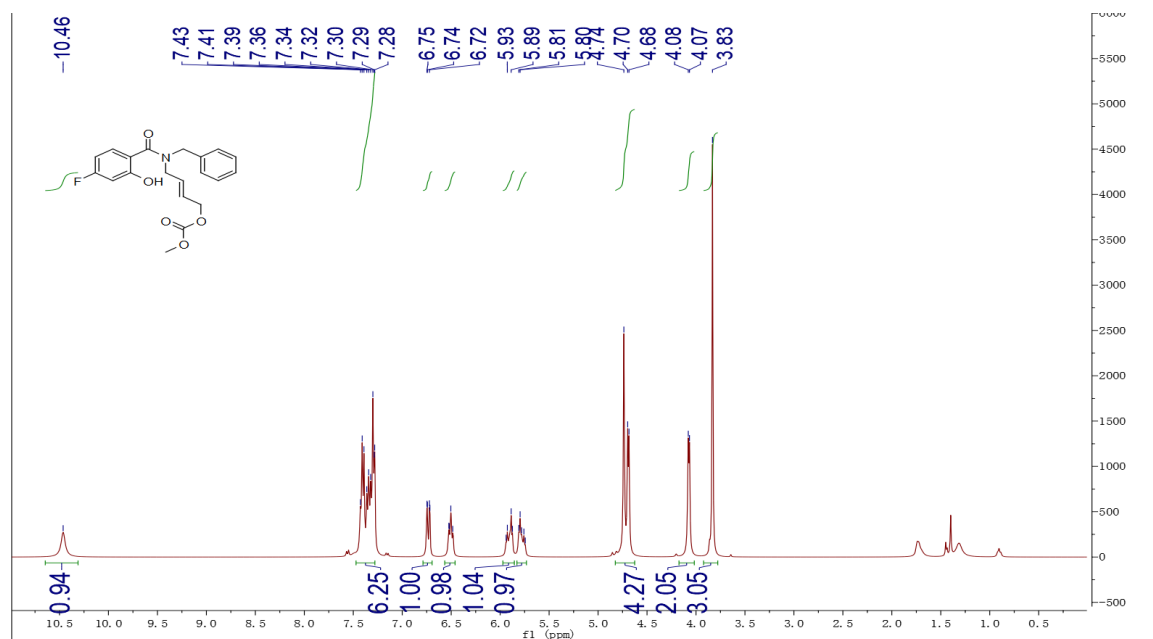

Figure 18.  $^{13}\text{C}$  NMR (100 MHz,  $\text{CDCl}_3$ ) spectrum of **1i**

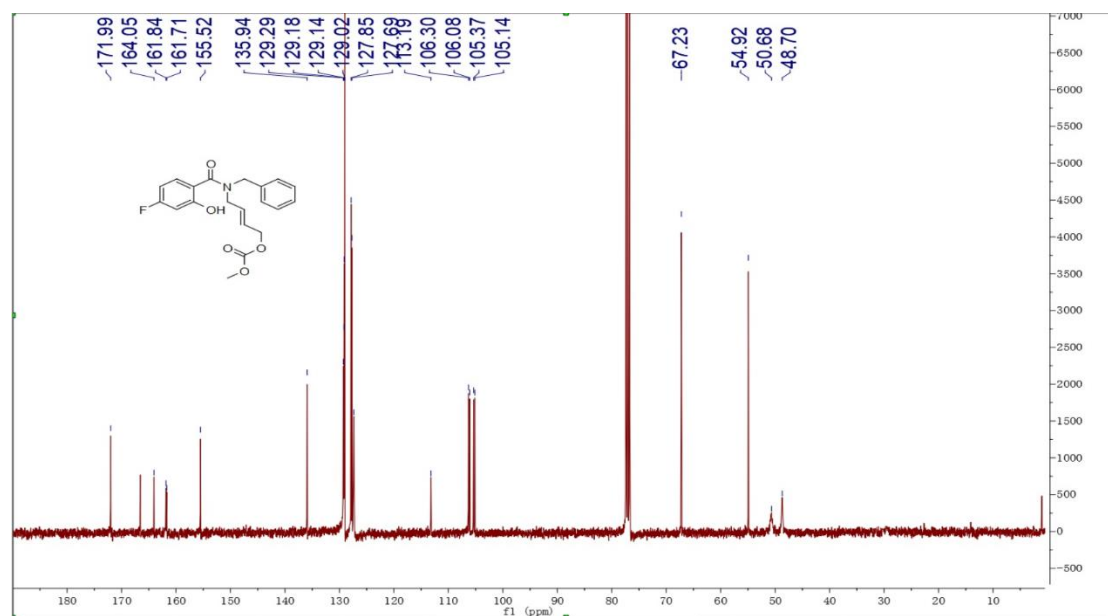

Figure 19.  $^{19}\text{F}$  NMR (376 MHz,  $\text{CDCl}_3$ ) spectrum of **1i**

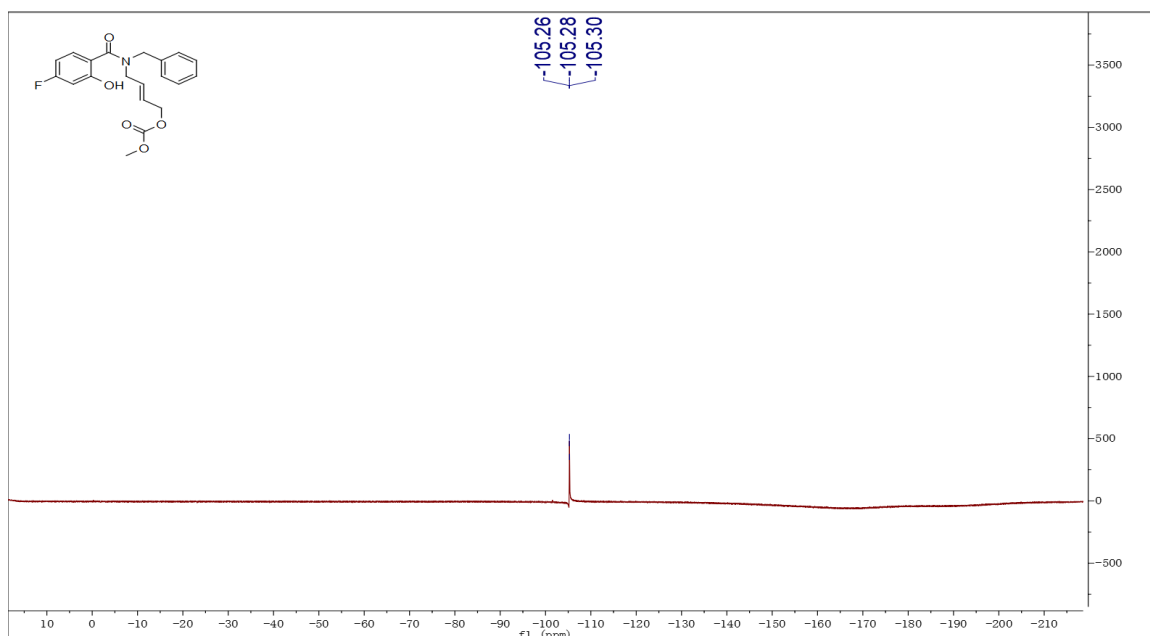

Figure 20.  $^1\text{H}$  NMR (400 MHz,  $\text{CDCl}_3$ ) spectrum of **1j**

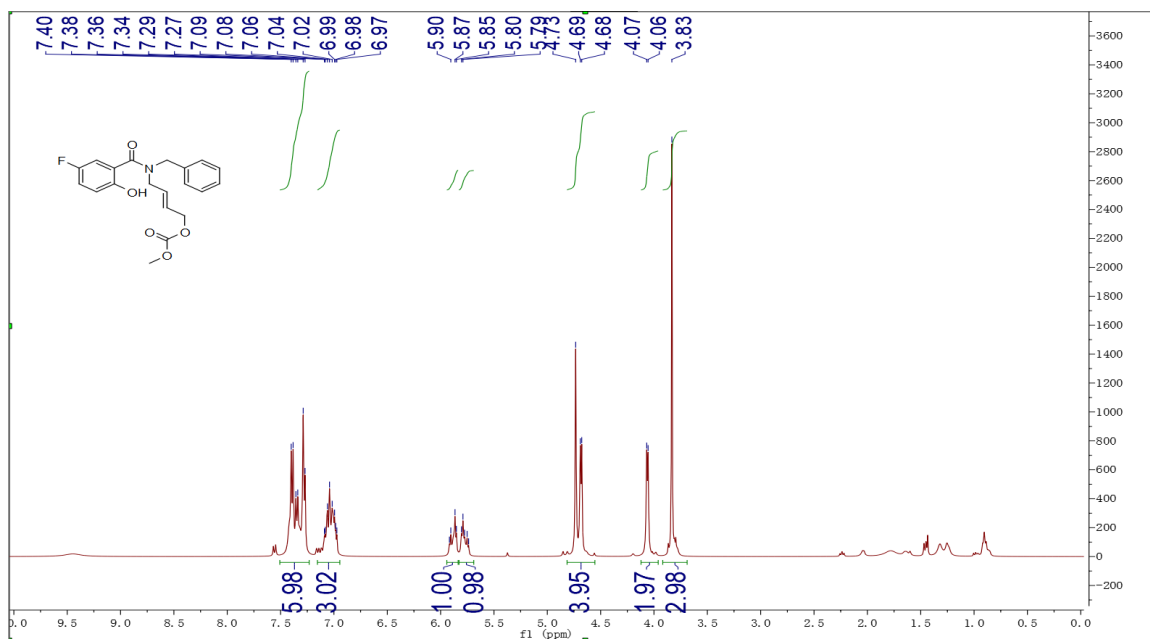

**Figure 21.**  $^{13}\text{C}$  NMR (100 MHz,  $\text{CDCl}_3$ ) spectrum of **1j**

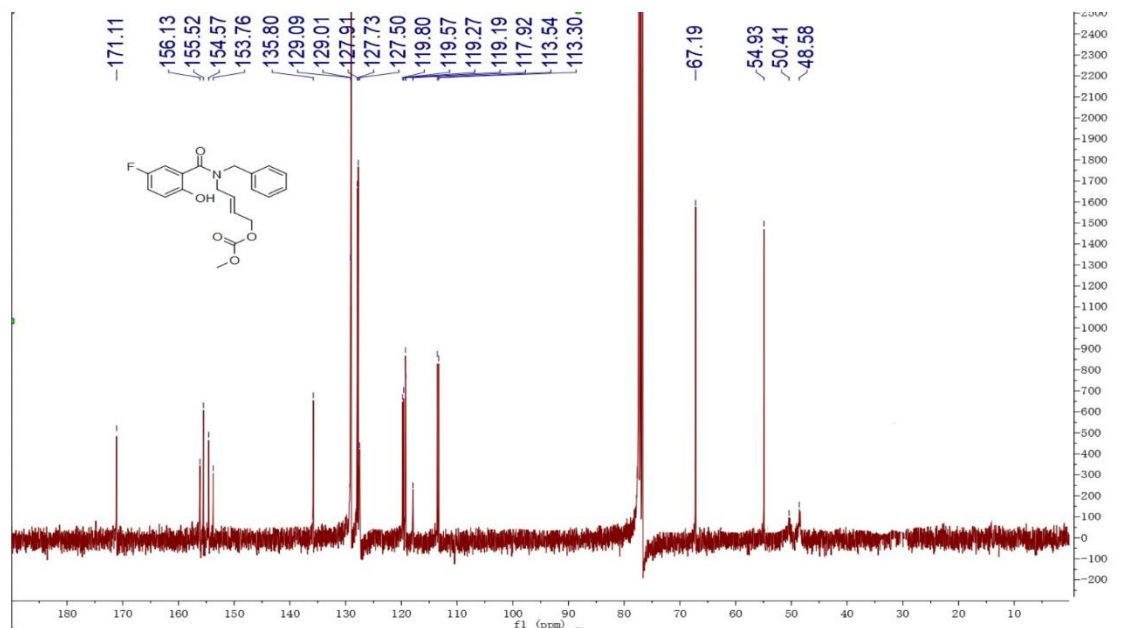

**Figure 22.**  $^{19}\text{F}$  NMR (376 MHz,  $\text{CDCl}_3$ ) spectrum of **1j**

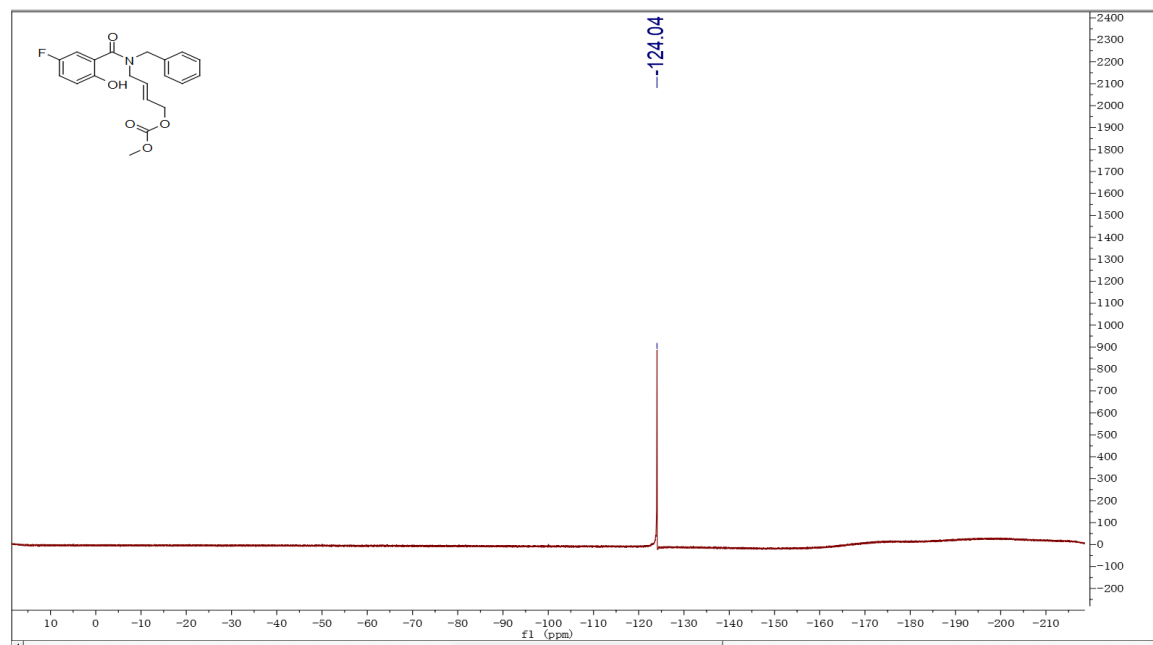

Figure 23.  $^1\text{H}$  NMR (400 MHz,  $\text{CDCl}_3$ ) spectrum of 1k

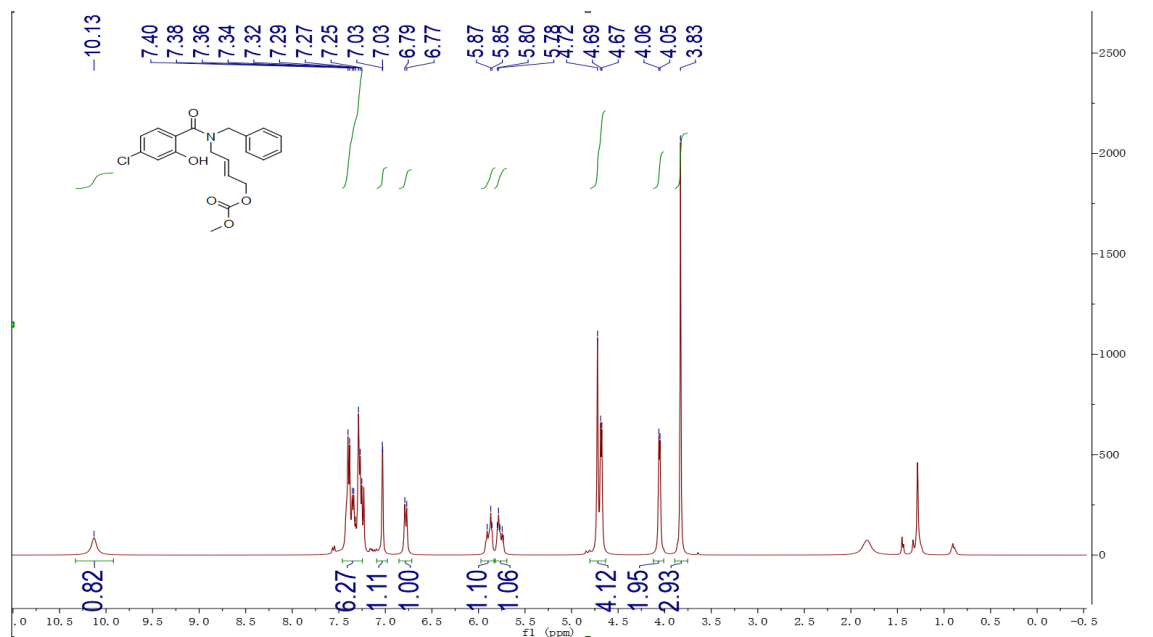

Figure 24.  $^{13}\text{C}$  NMR (100 MHz,  $\text{CDCl}_3$ ) spectrum of 1k

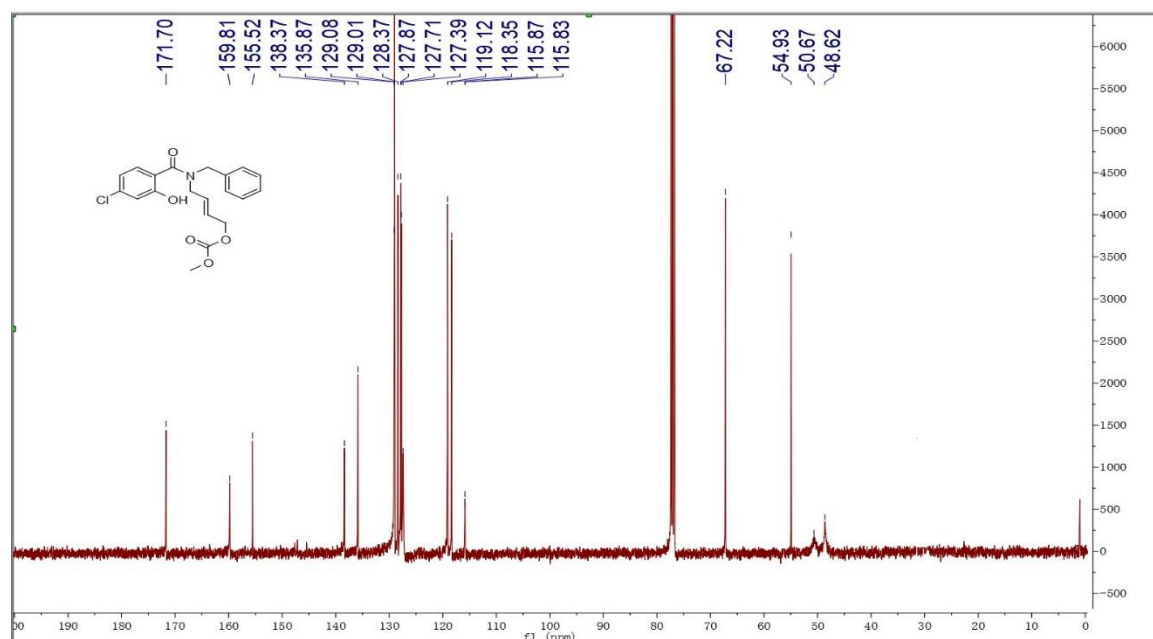

Figure 25.  $^1\text{H}$  NMR (400 MHz,  $\text{CDCl}_3$ ) spectrum of 11

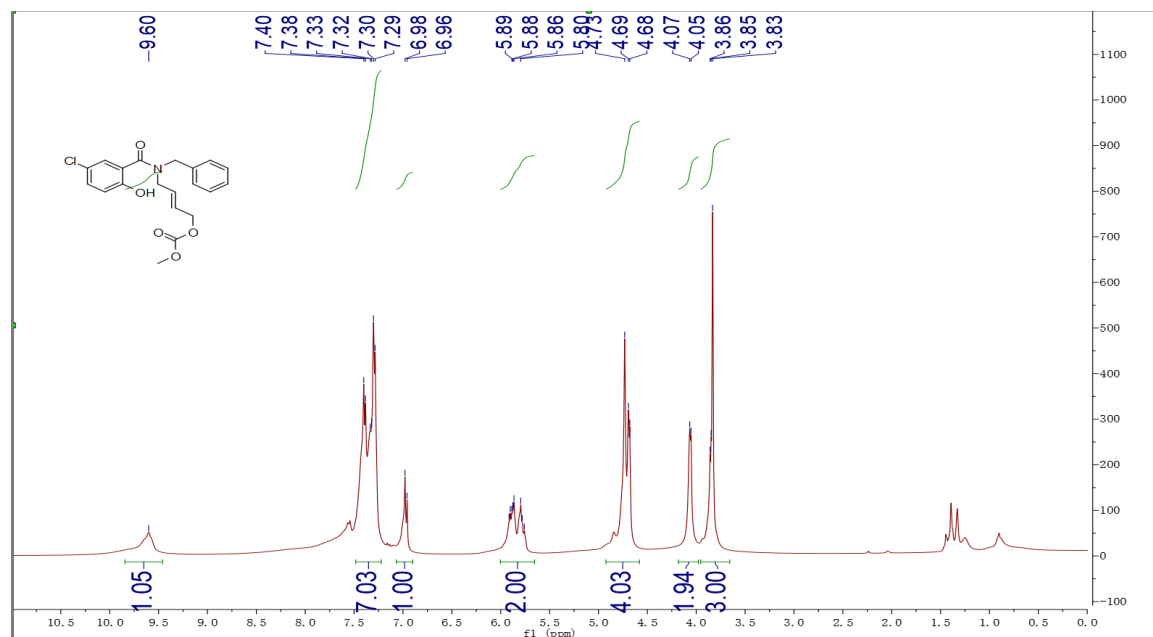

Figure 26.  $^{13}\text{C}$  NMR (100 MHz,  $\text{CDCl}_3$ ) spectrum of 11

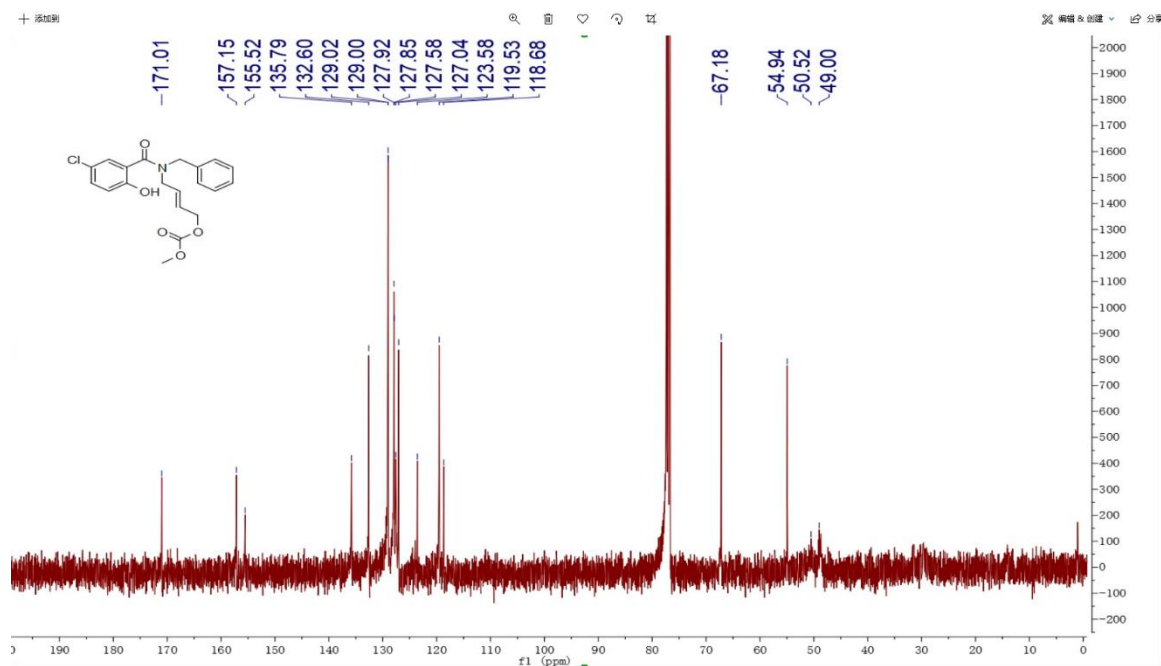



Figure 27.  $^1\text{H}$  NMR (400 MHz,  $\text{CDCl}_3$ ) spectrum of 1m

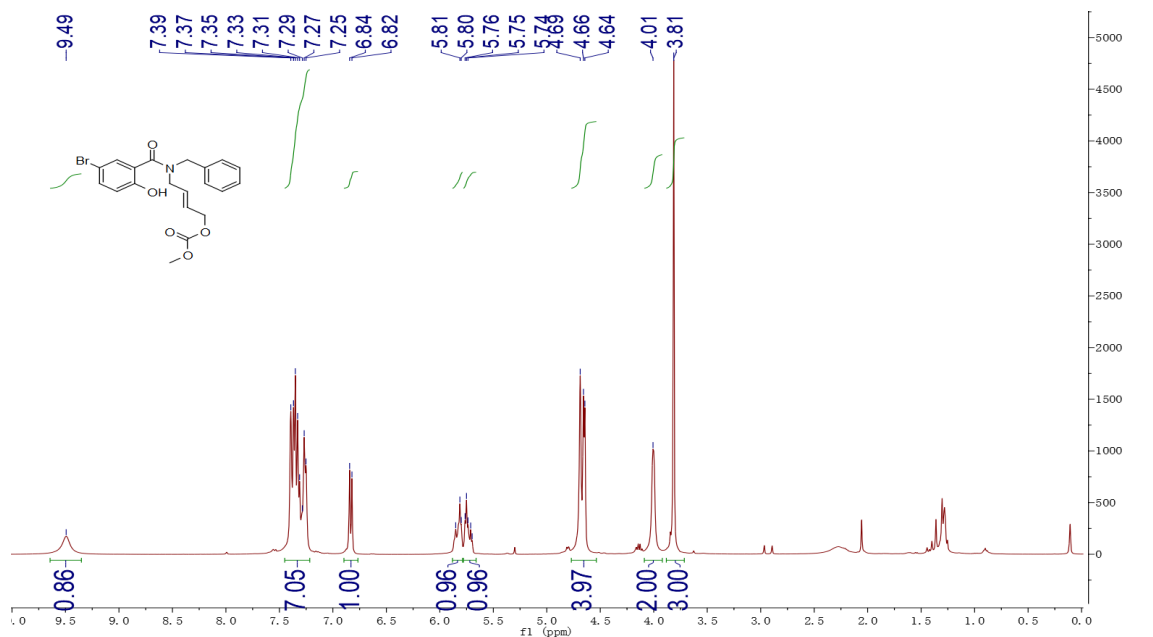

Figure 28.  $^{13}\text{C}$  NMR (100 MHz,  $\text{CDCl}_3$ ) spectrum of 1m

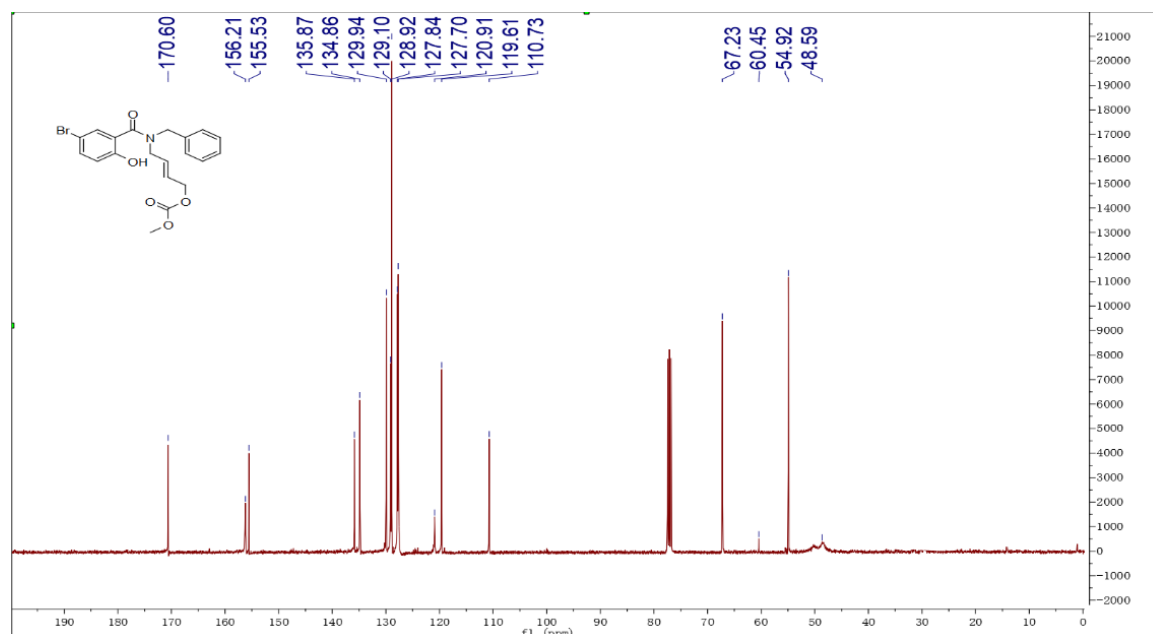

Figure 29.  $^1\text{H}$  NMR (400 MHz,  $\text{CDCl}_3$ ) spectrum of **1n**

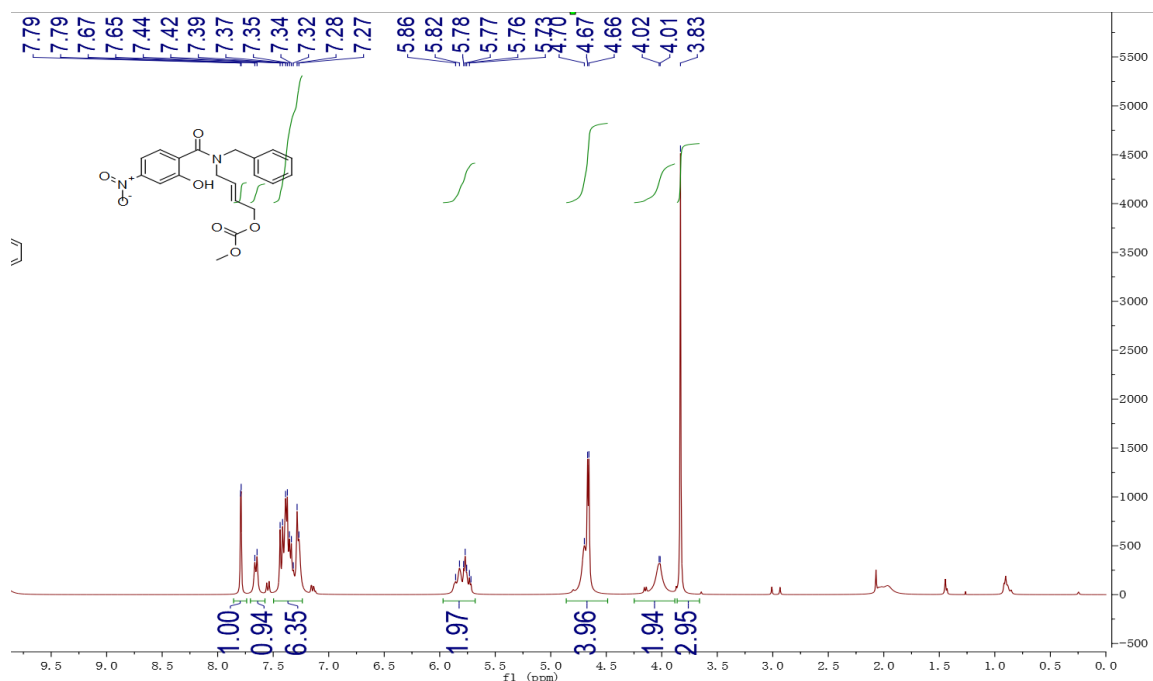

Figure 30.  $^{13}\text{C}$  NMR (100 MHz,  $\text{CDCl}_3$ ) spectrum of **1n**

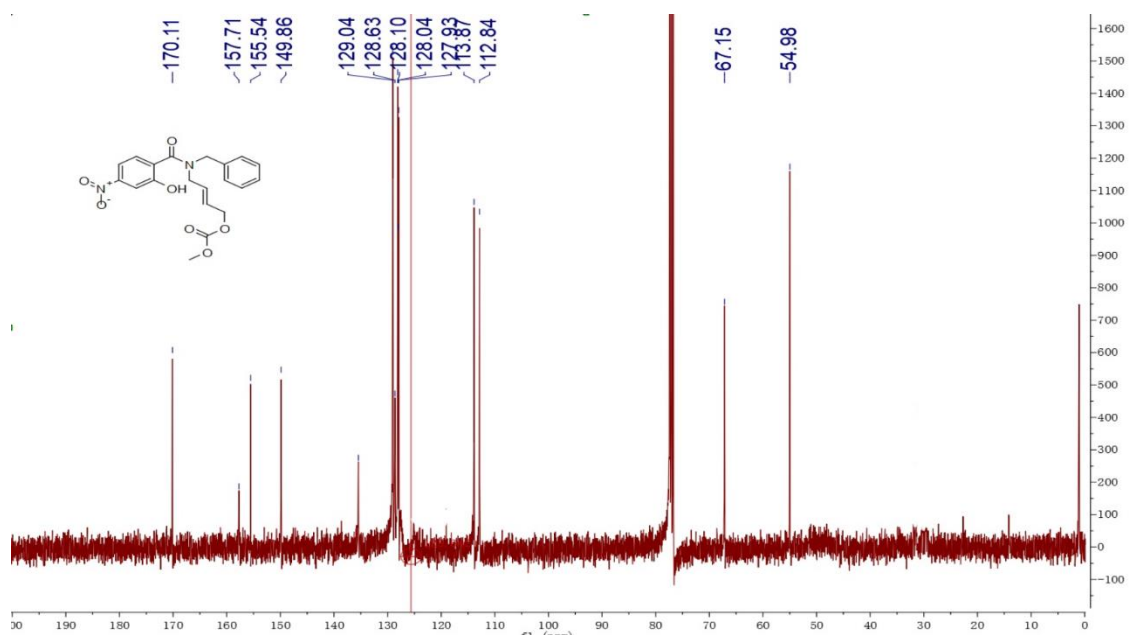

Figure 31.  $^1\text{H}$  NMR (400 MHz,  $\text{CDCl}_3$ ) spectrum of **1o**

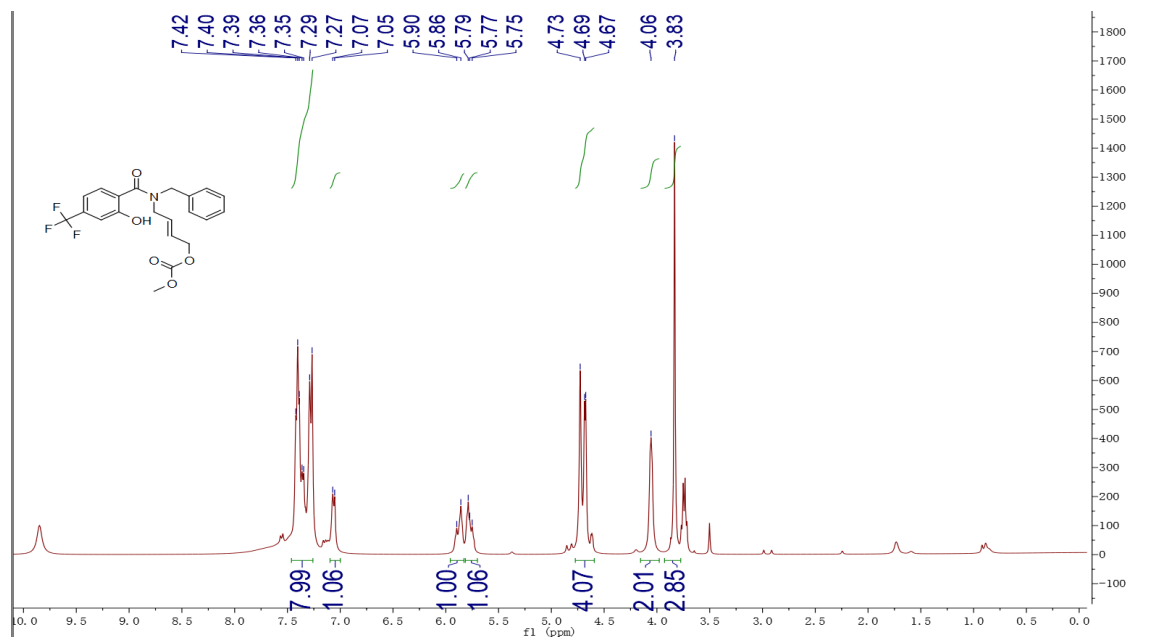

Figure 32.  $^{13}\text{C}$  NMR (100 MHz,  $\text{CDCl}_3$ ) spectrum of **1o**

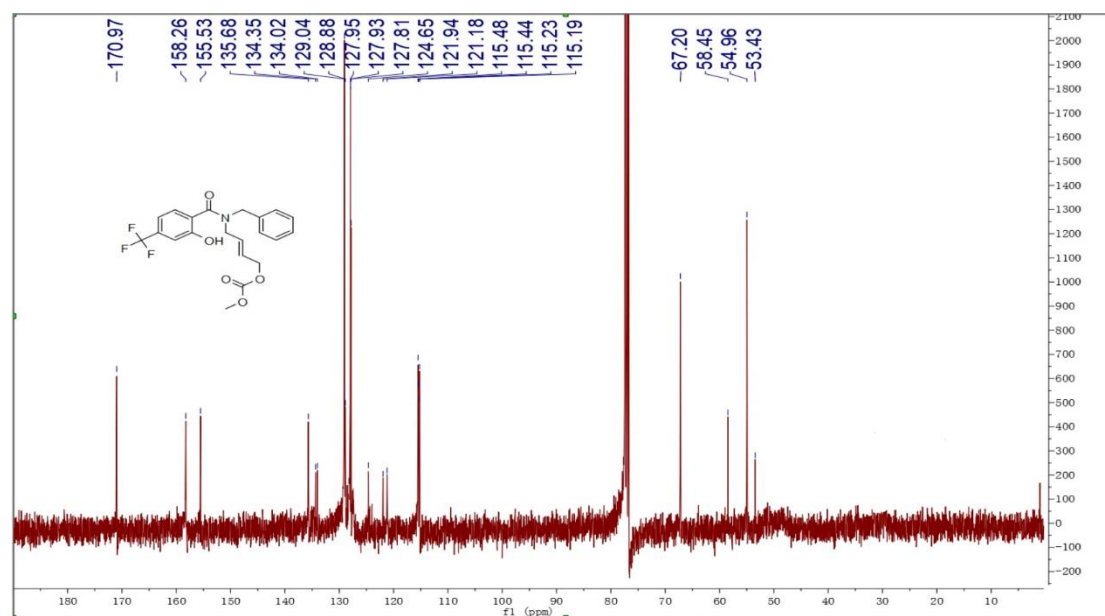

**Figure 33.**  $^{19}\text{F}$  NMR (376 MHz,  $\text{CDCl}_3$ ) spectrum of **1o**

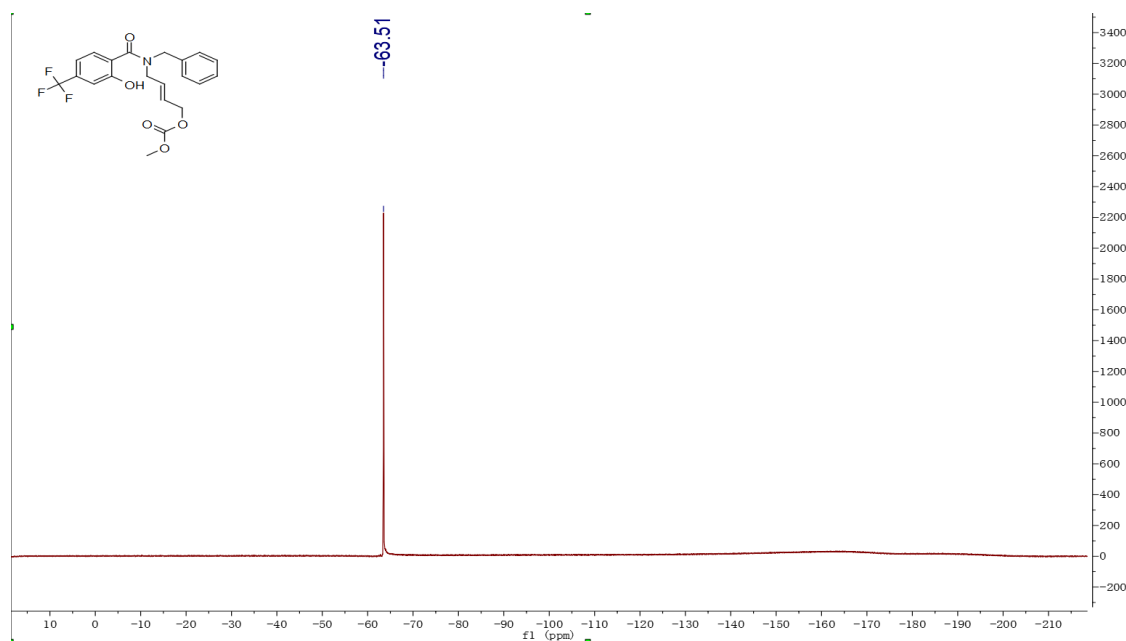

**Figure 34.**  $^1\text{H}$  NMR (400 MHz,  $\text{CDCl}_3$ ) spectrum of **1p**

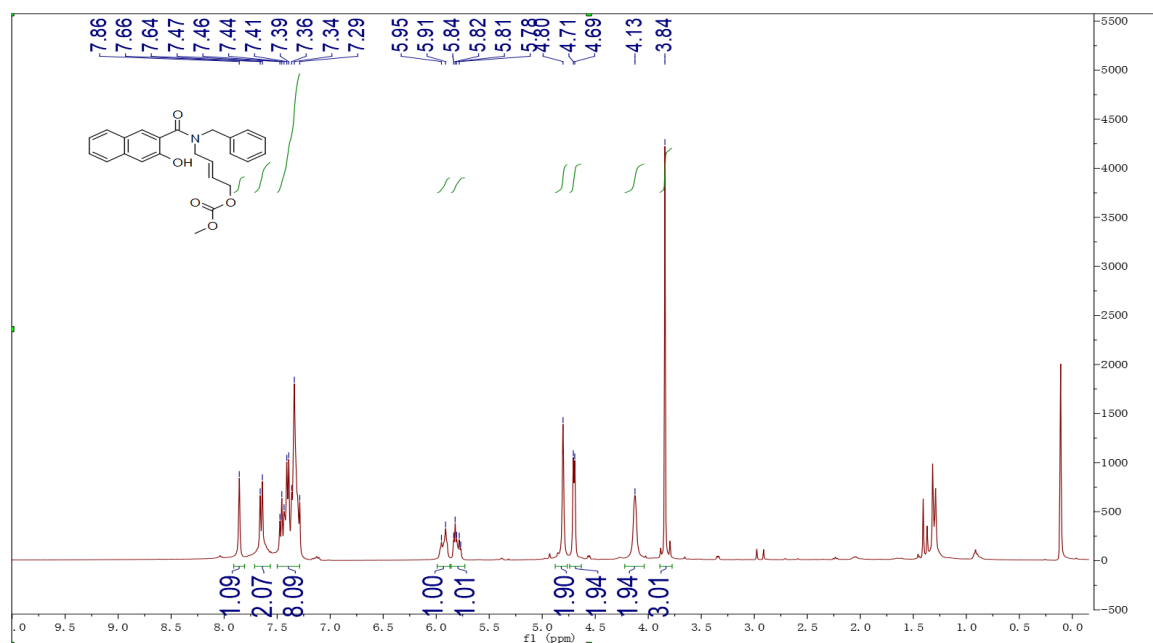

Figure 35.  $^{13}\text{C}$  NMR (100 MHz,  $\text{CDCl}_3$ ) spectrum of 1p

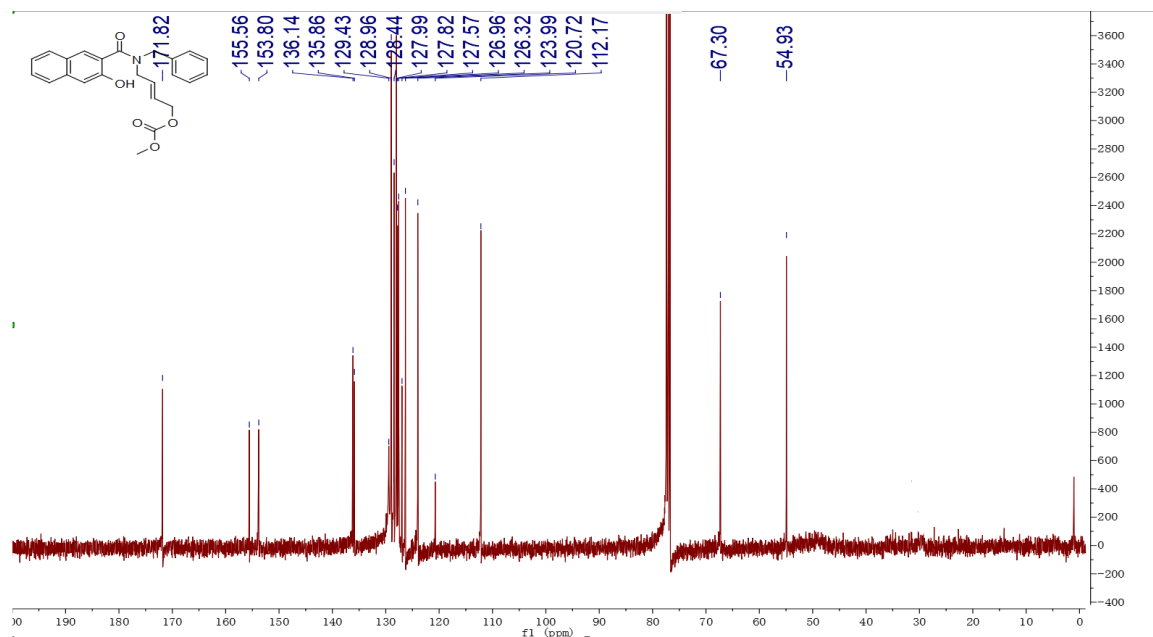

Figure 36.  $^1\text{H}$  NMR (400 MHz,  $\text{CDCl}_3$ ) spectrum of 1q

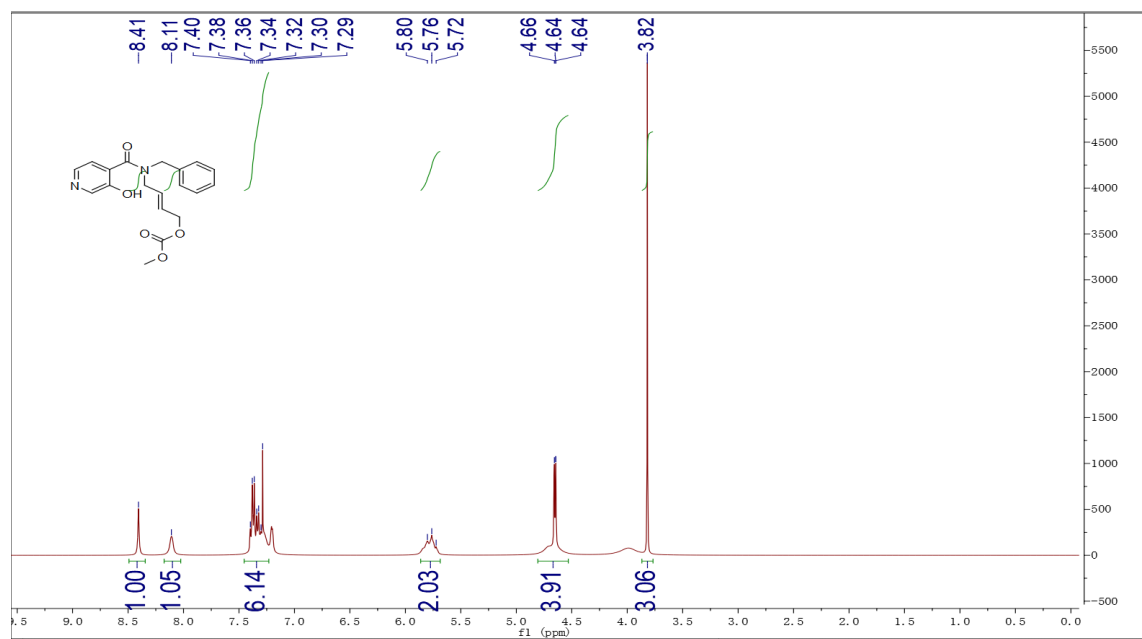

Figure 37.  $^{13}\text{C}$  NMR (100 MHz,  $\text{CDCl}_3$ ) spectrum of 1q

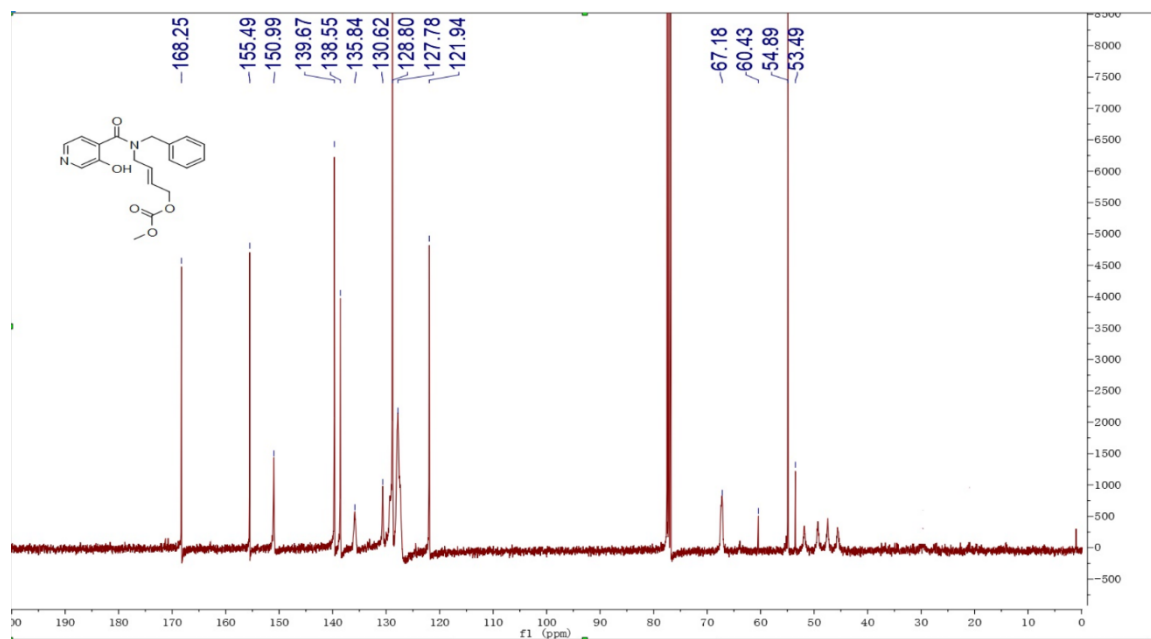

Figure 38.  $^1\text{H}$  NMR (400 MHz,  $\text{CDCl}_3$ ) spectrum of 1r

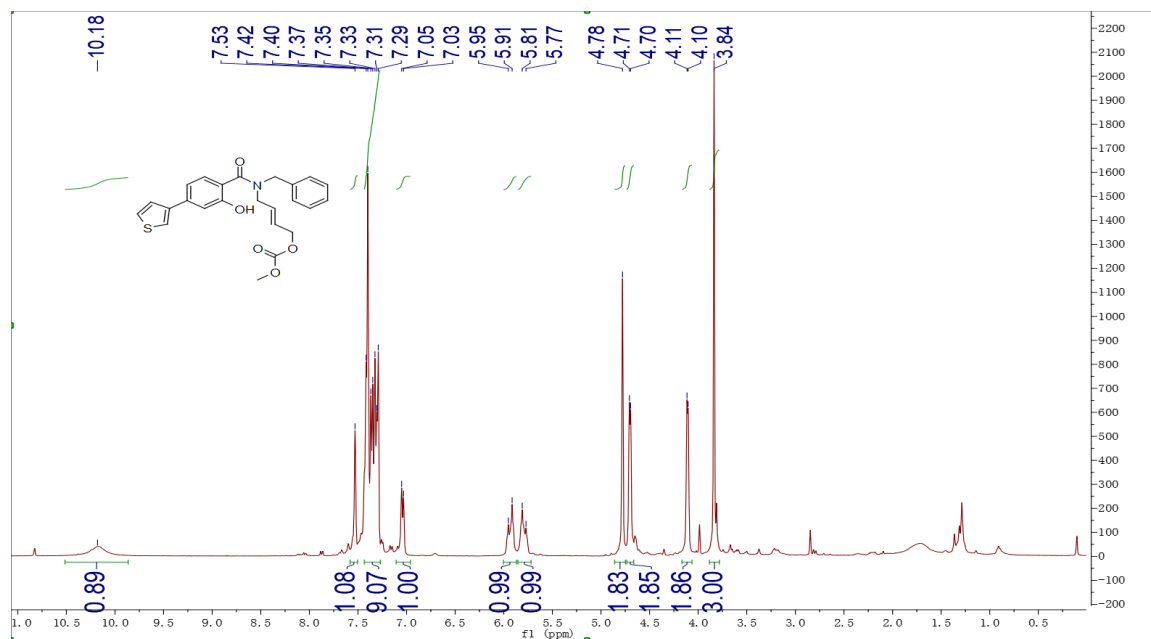

**Figure 39.**  $^{13}\text{C}$  NMR (100 MHz,  $\text{CDCl}_3$ ) spectrum of **1r**

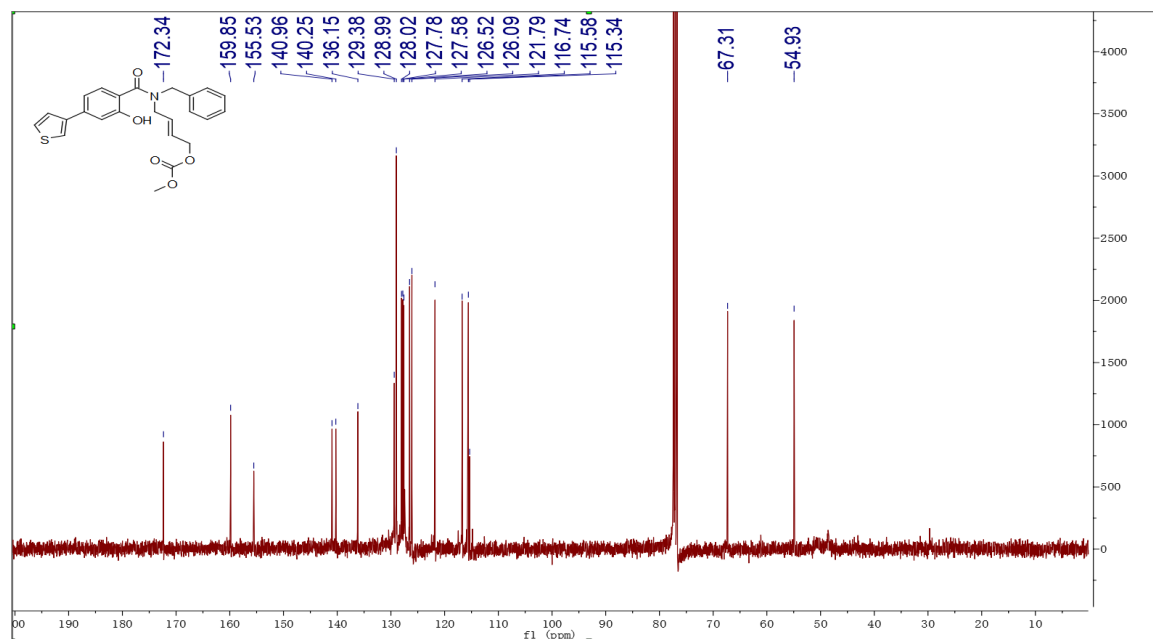

**Figure 40.**  $^1\text{H}$  NMR (400 MHz,  $\text{CDCl}_3$ ) spectrum of **1s**

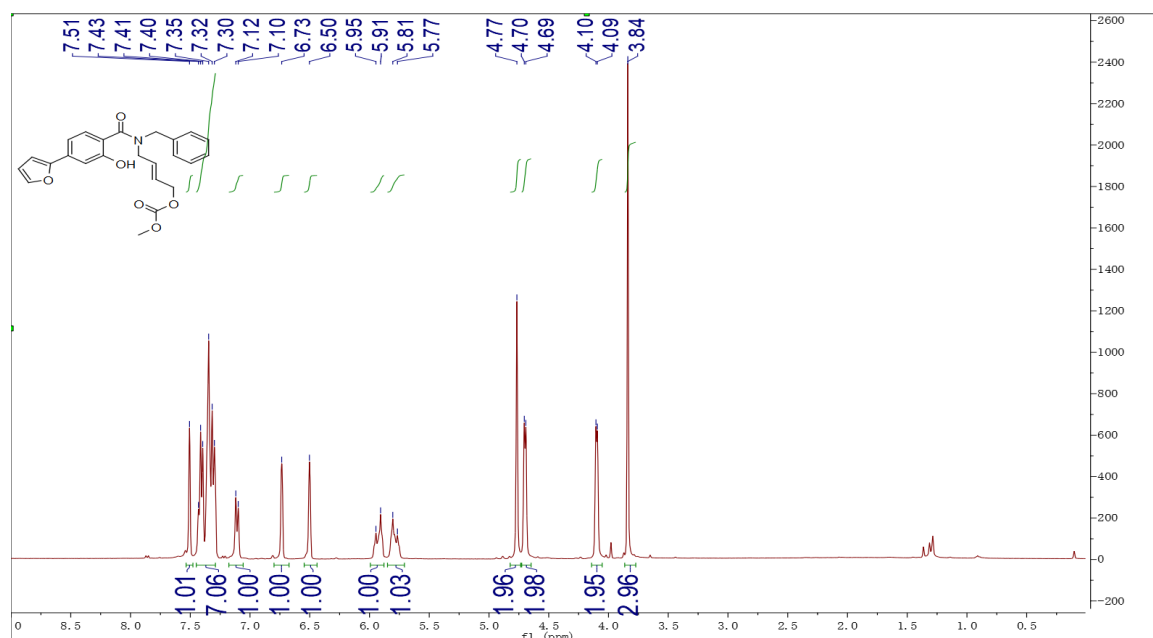

**Figure 41.**  $^{13}\text{C}$  NMR (100 MHz,  $\text{CDCl}_3$ ) spectrum of **1s**

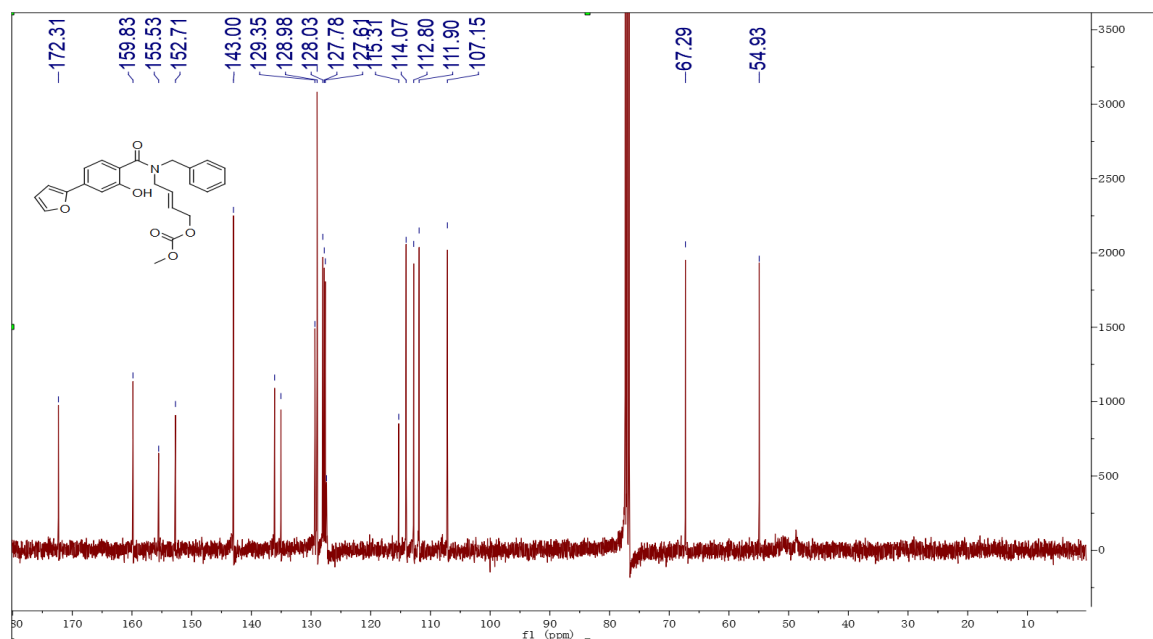

**Figure 42.**  $^1\text{H}$  NMR (400 MHz,  $\text{CDCl}_3$ ) spectrum of **1t**

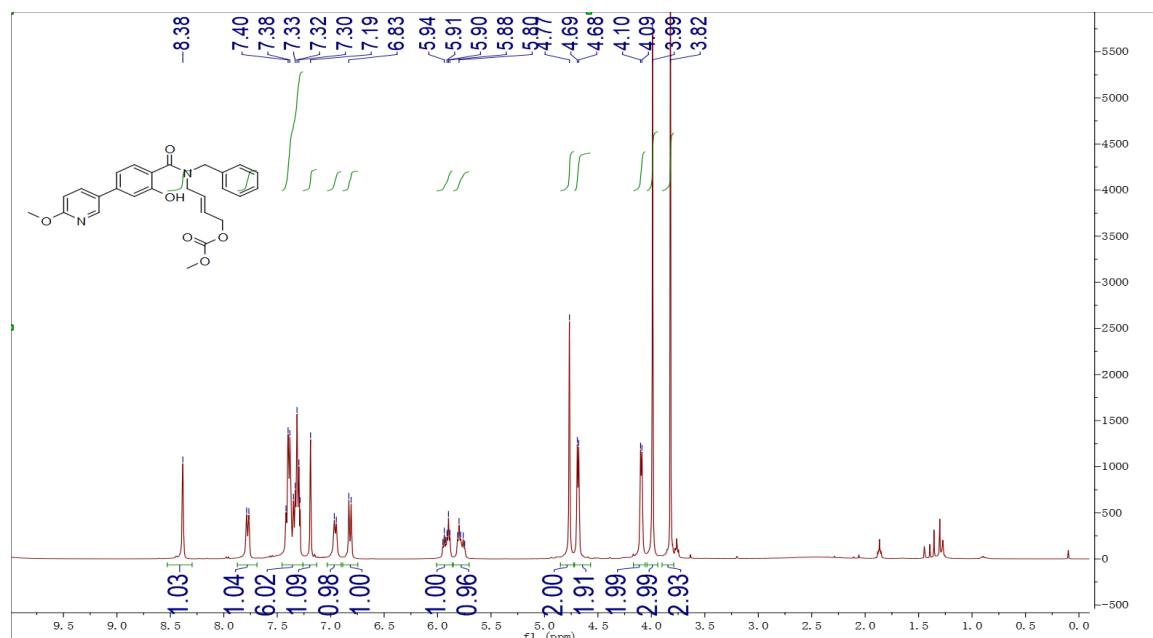



Figure 43.  $^{13}\text{C}$  NMR (100 MHz,  $\text{CDCl}_3$ ) spectrum of 1t

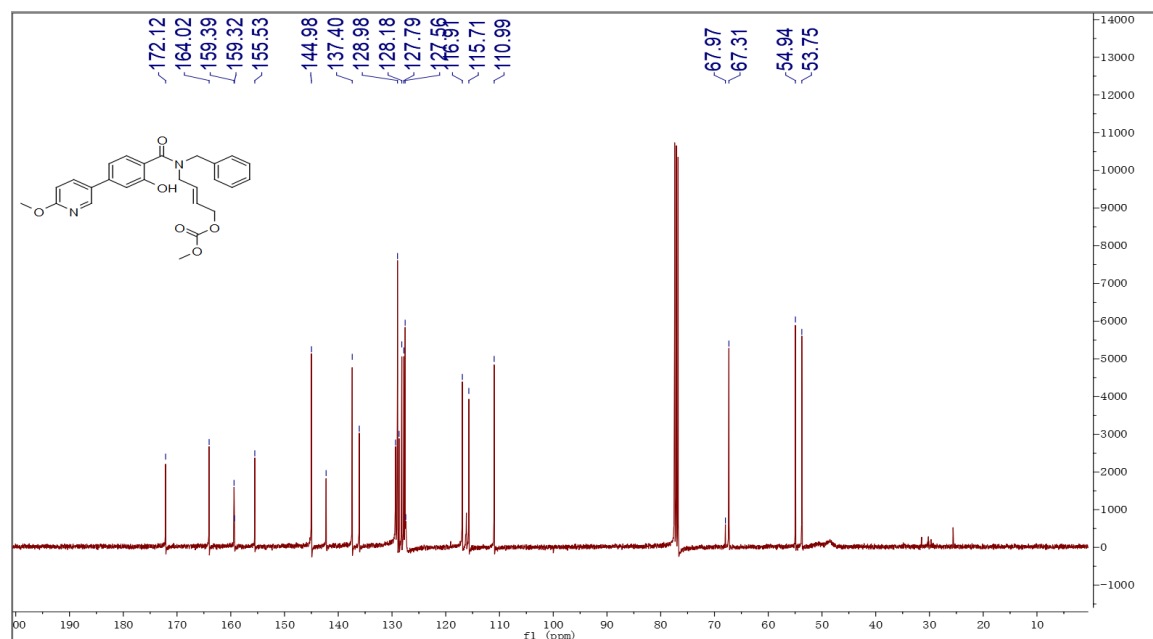

Figure 44.  $^1\text{H}$  NMR (400 MHz,  $\text{CDCl}_3$ ) spectrum of 1u

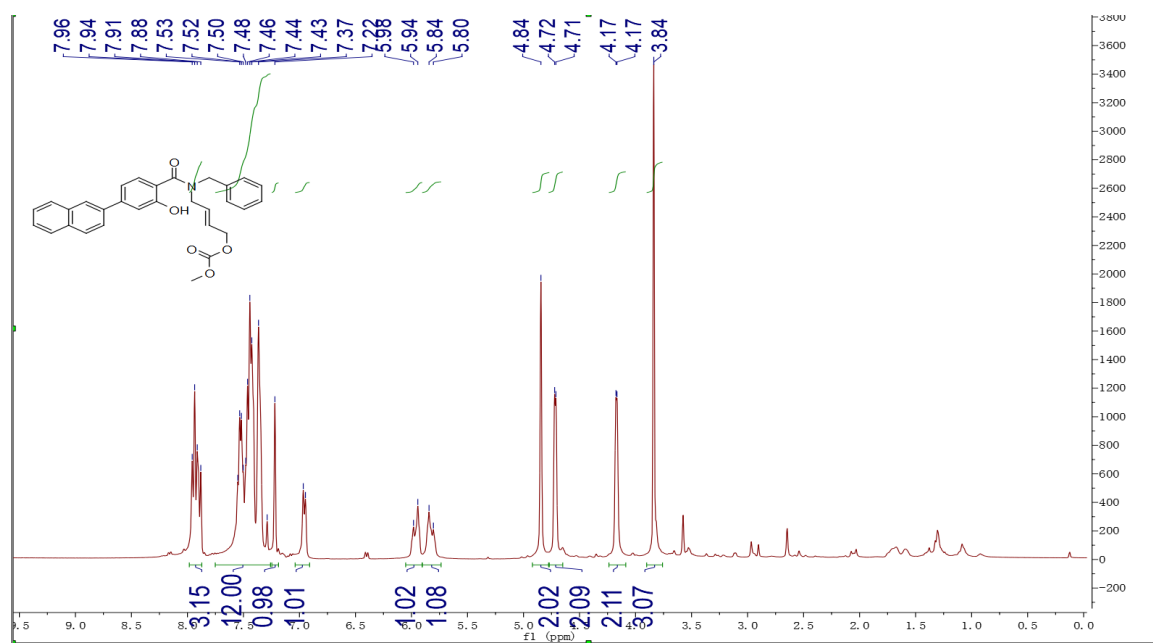

Figure 45.  $^{13}\text{C}$  NMR (100 MHz,  $\text{CDCl}_3$ ) spectrum of **1u**

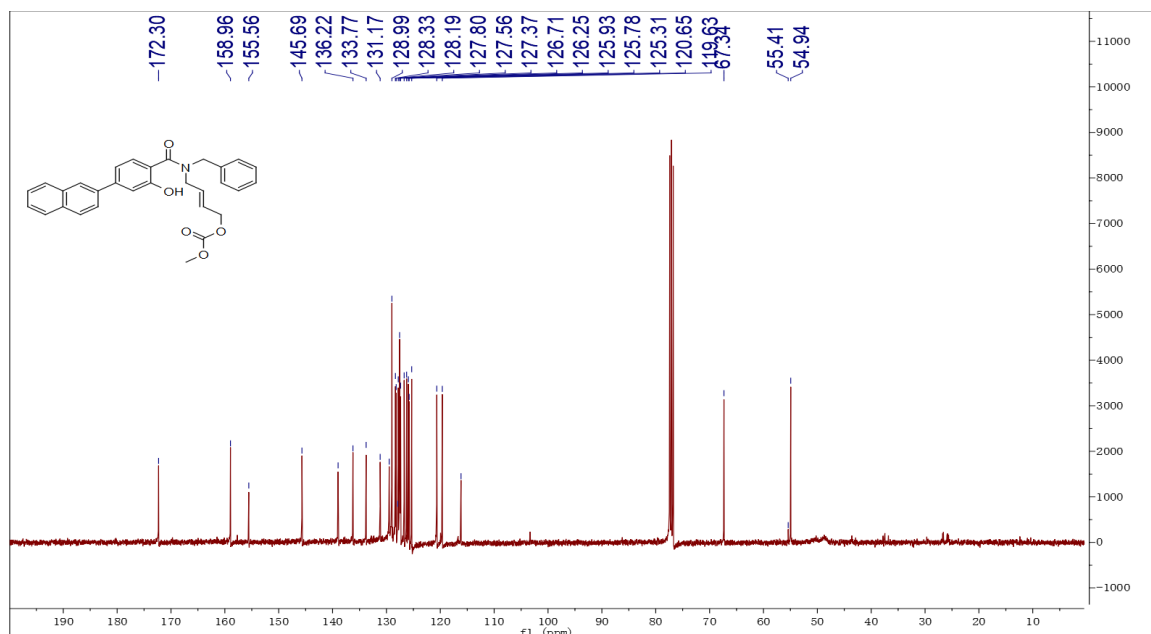

Figure 46.  $^1\text{H}$  NMR (400 MHz,  $\text{CDCl}_3$ ) spectrum of (*E*)-**1v**

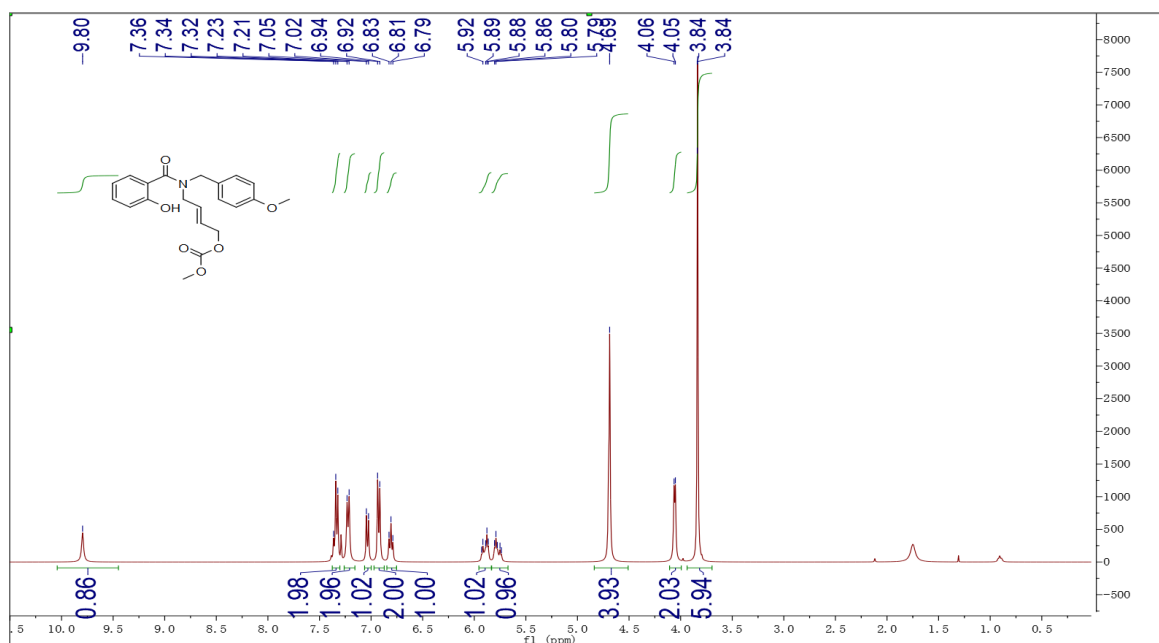

Figure 47.  $^{13}\text{C}$  NMR (100 MHz,  $\text{CDCl}_3$ ) spectrum of (*E*)-1v

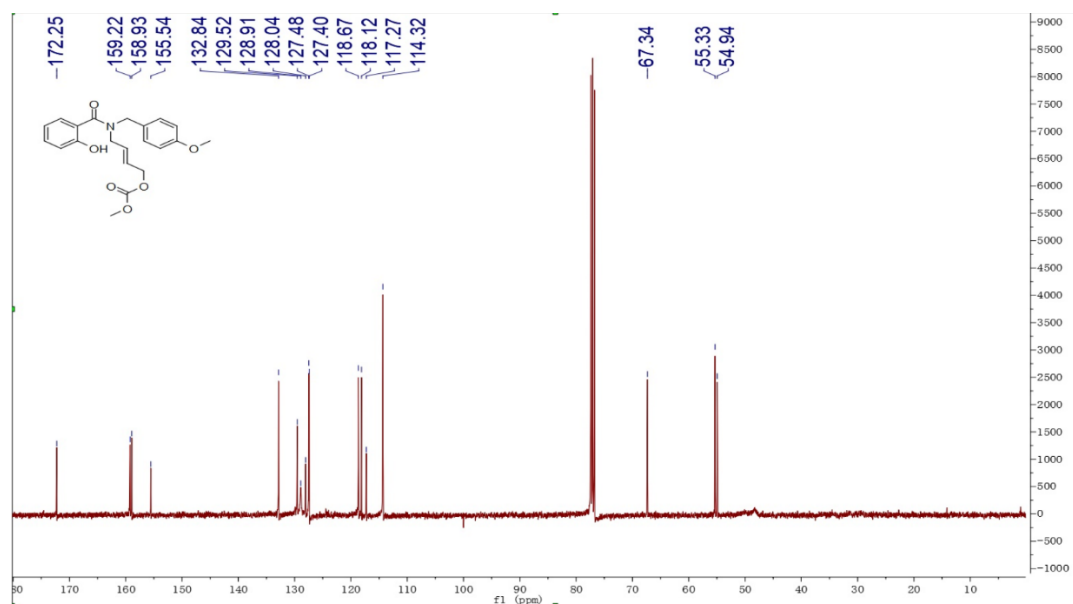

Figure 48.  $^1\text{H}$  NMR (400 MHz,  $\text{CDCl}_3$ ) spectrum of (*Z*)-1v

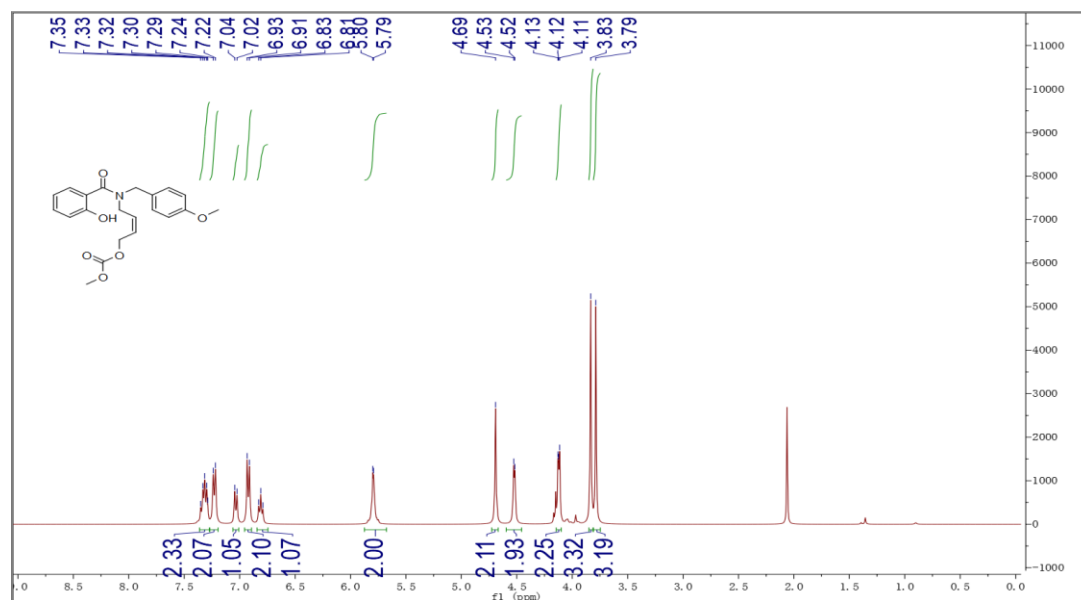

Figure 49.  $^{13}\text{C}$  NMR (100 MHz,  $\text{CDCl}_3$ ) spectrum of (Z)-1v

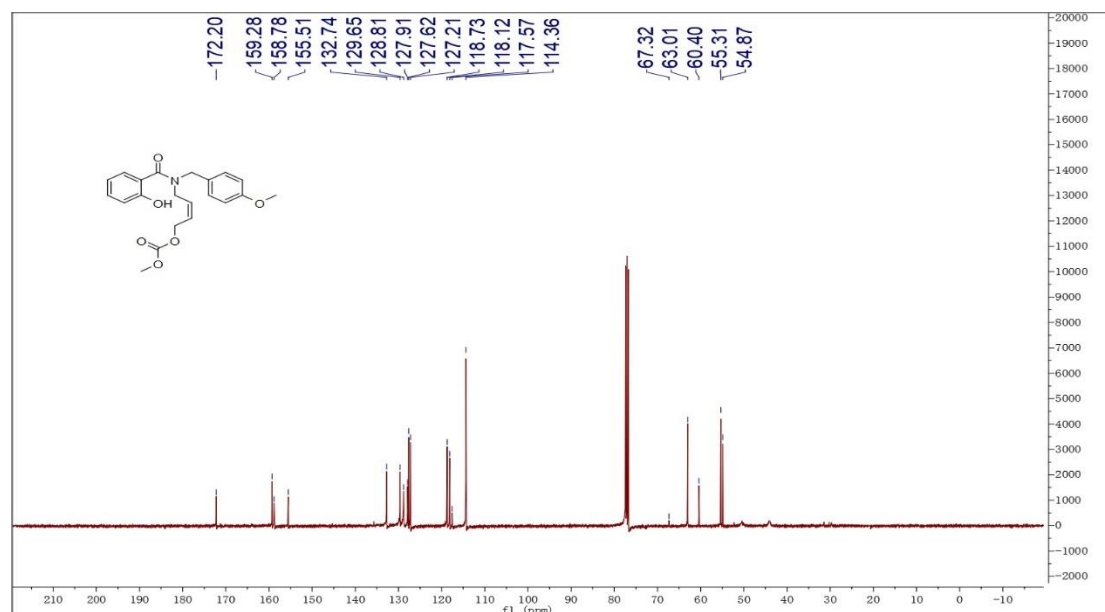

4-Benzyl-2-vinyl-3,4-dihydro-2 $\lambda^3$ -benzo[f][1,4]oxazepin-5(2H)-one (2a)

Figure 50.  $^1\text{H}$  NMR (400 MHz,  $\text{CDCl}_3$ ) spectrum of 2a

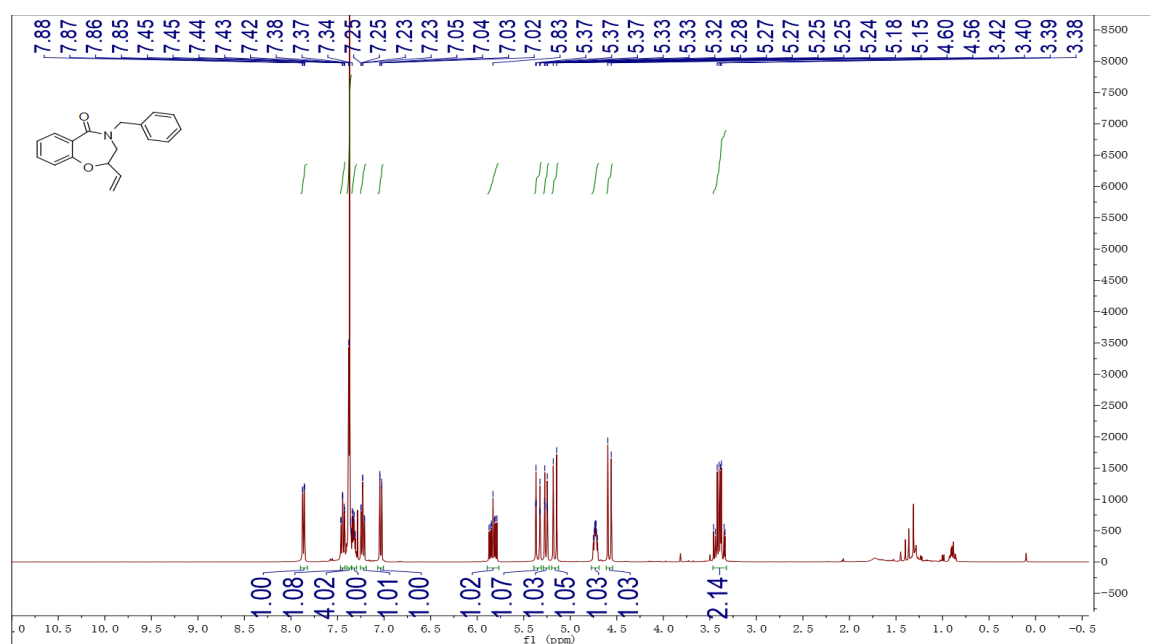

Figure 51.  $^{13}\text{C}$  NMR (100 MHz,  $\text{CDCl}_3$ ) spectrum of 2a

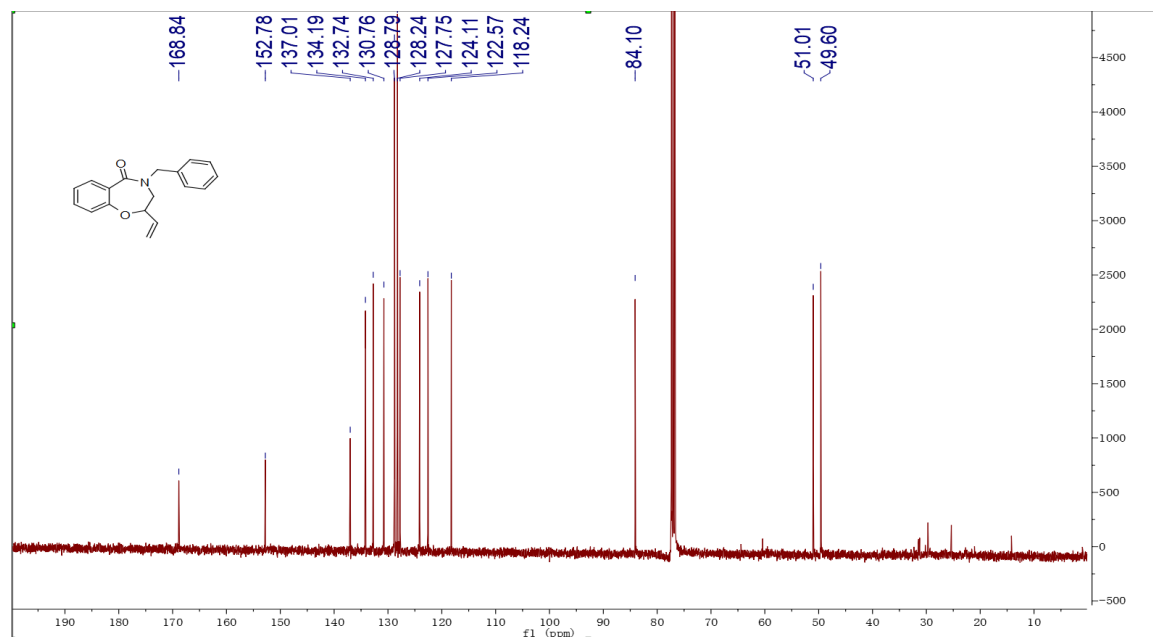

4-Benzyl-8-methyl-2-vinyl-3,4-dihydrobenzo[*f*][1,4]oxazepin-5(2*H*)-one (2b)

Figure 52.  $^1\text{H}$  NMR (400 MHz,  $\text{CDCl}_3$ ) spectrum of 2b

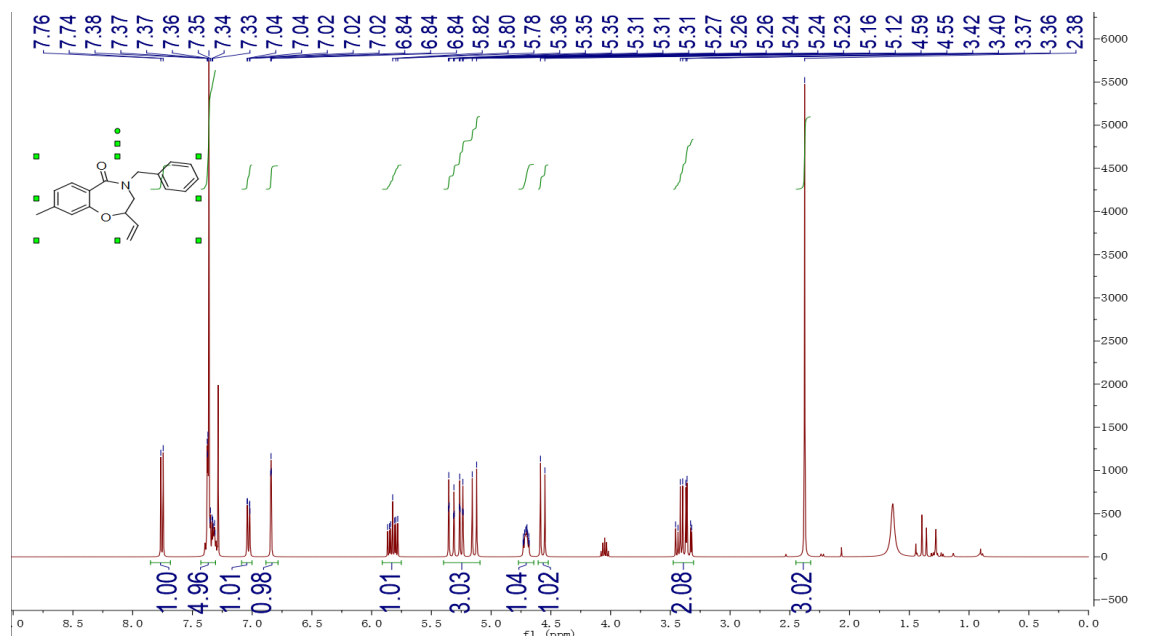

Figure 53.  $^{13}\text{C}$  NMR (100 MHz,  $\text{CDCl}_3$ ) spectrum of **2b**

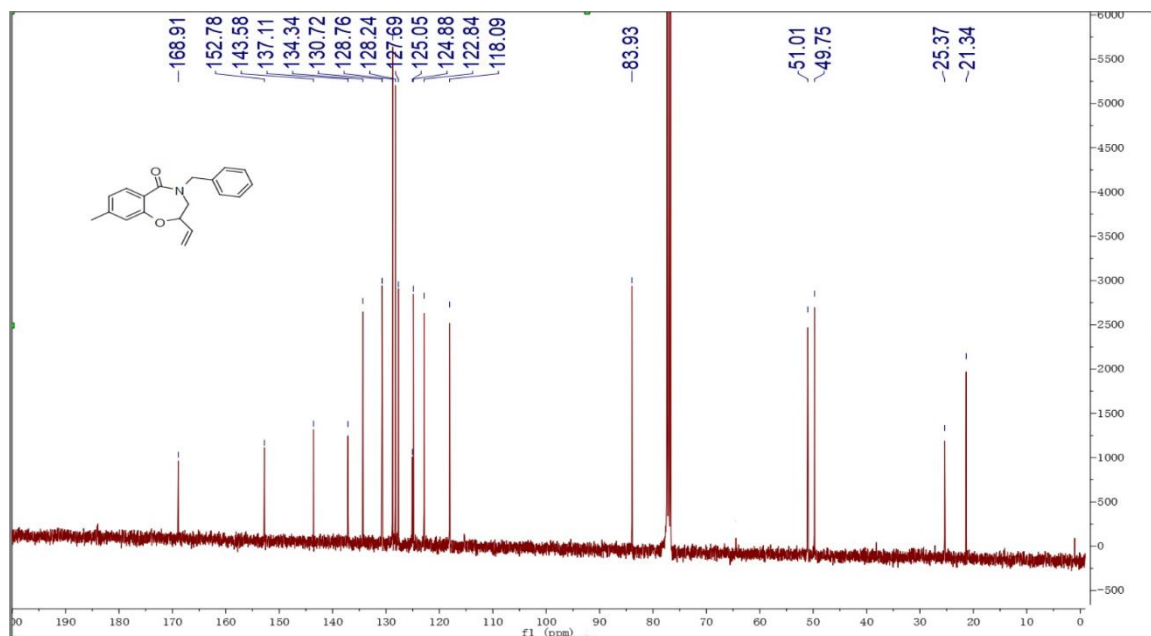

4-Benzyl-7-methyl-2-vinyl-3,4-dihydrobenzo[*f*][1,4]oxazepin-5(2*H*)-one (**2c**)

Figure 54.  $^1\text{H}$  NMR (400 MHz,  $\text{CDCl}_3$ ) spectrum of **2c**

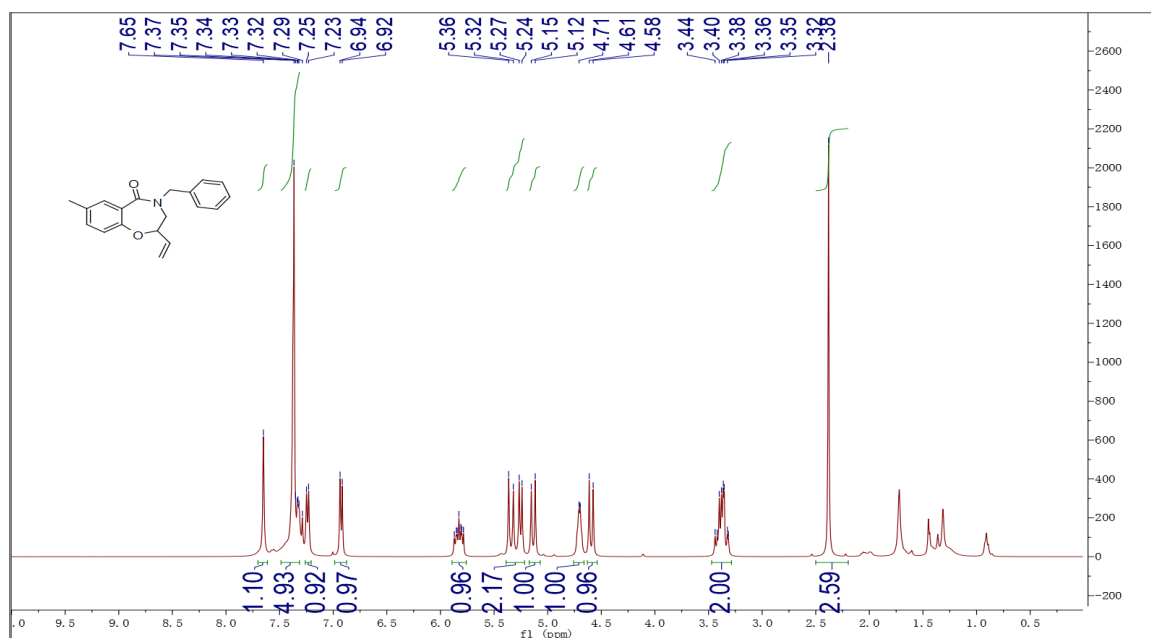

Figure 55.  $^{13}\text{C}$  NMR (100 MHz,  $\text{CDCl}_3$ ) spectrum of **2c**

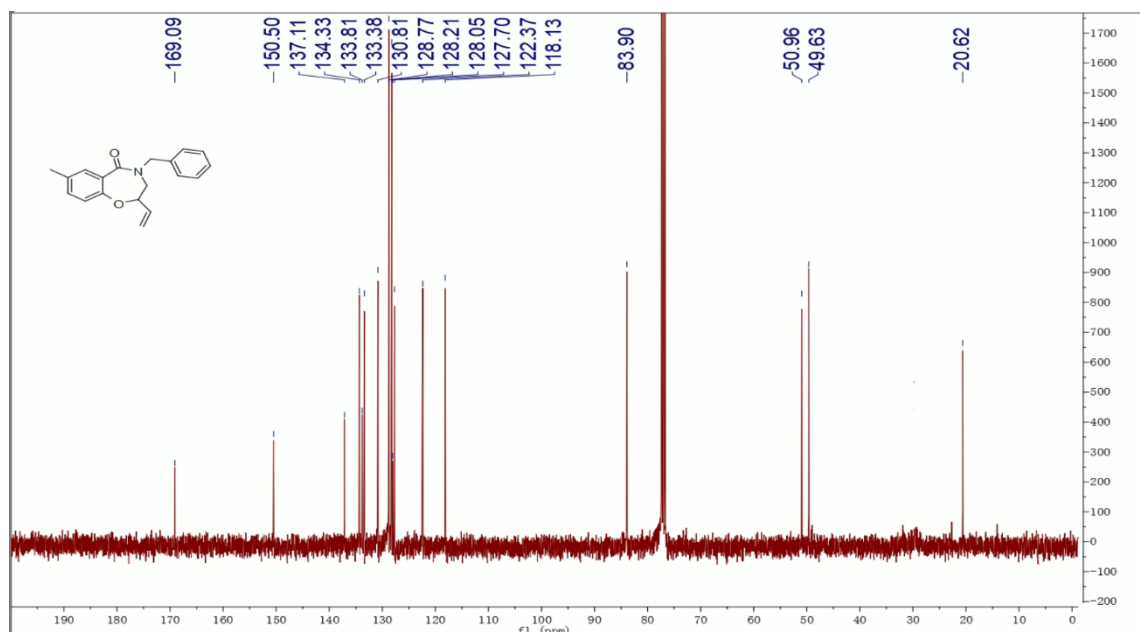

4-Benzyl-6-methyl-2-vinyl-3,4-dihydrobenzo[*f*][1,4]oxazepin-5(2*H*)-one (**2d**)

Figure 56.  $^1\text{H}$  NMR (400 MHz,  $\text{CDCl}_3$ ) spectrum of **2d**

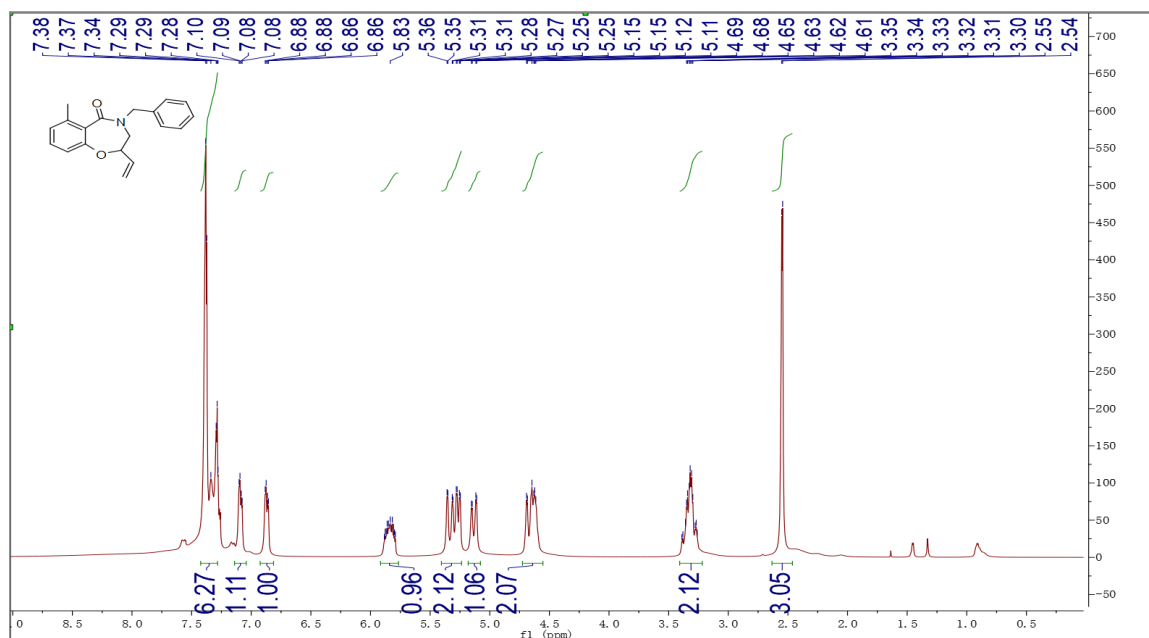

Figure 57.  $^{13}\text{C}$  NMR (100 MHz,  $\text{CDCl}_3$ ) spectrum of 2d

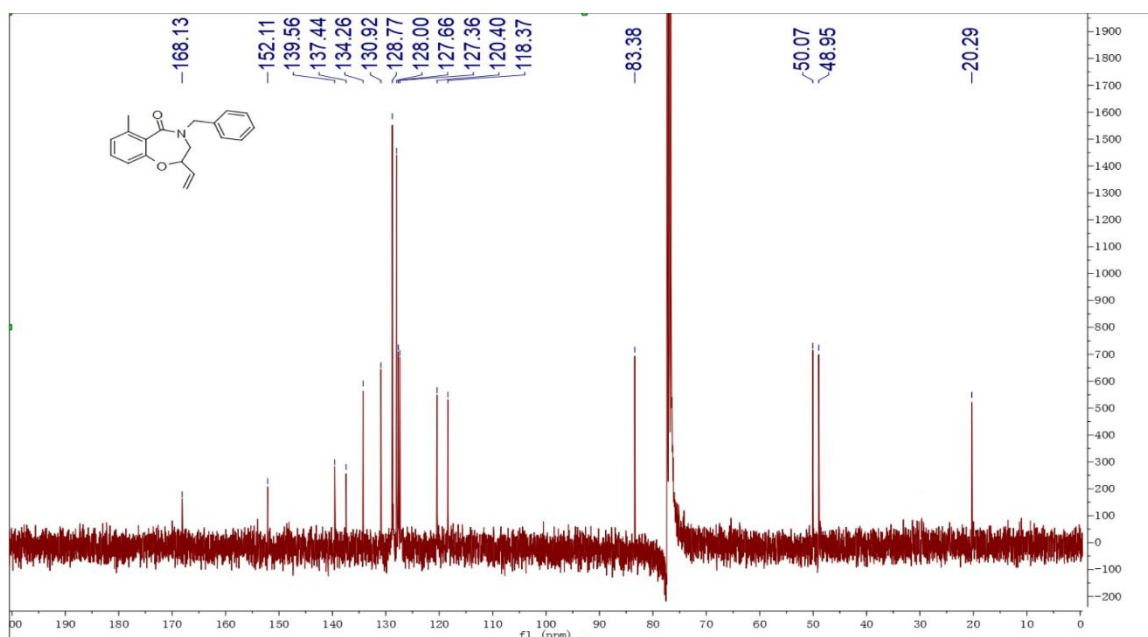

4-Benzyl-9-methoxy-2-vinyl-3,4-dihydrobenzo[f][1,4]oxazepin-5(2H)-one  
(2e)

Figure 58.  $^1\text{H}$  NMR (400 MHz,  $\text{CDCl}_3$ ) spectrum of 2e

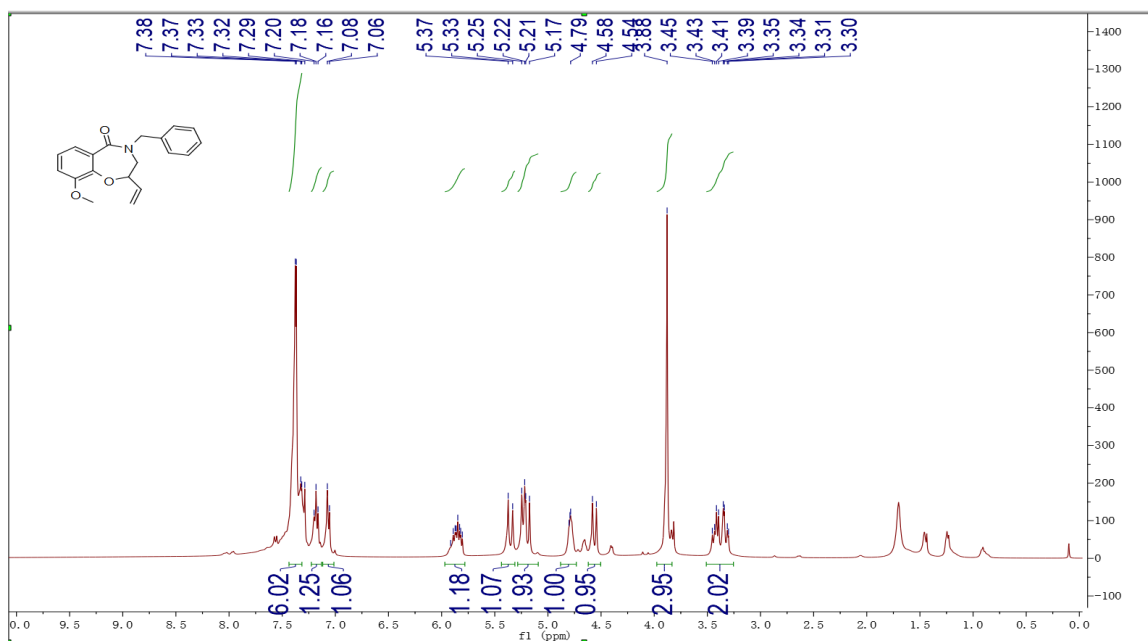



Figure 59.  $^{13}\text{C}$  NMR (100 MHz,  $\text{CDCl}_3$ ) spectrum of 2e

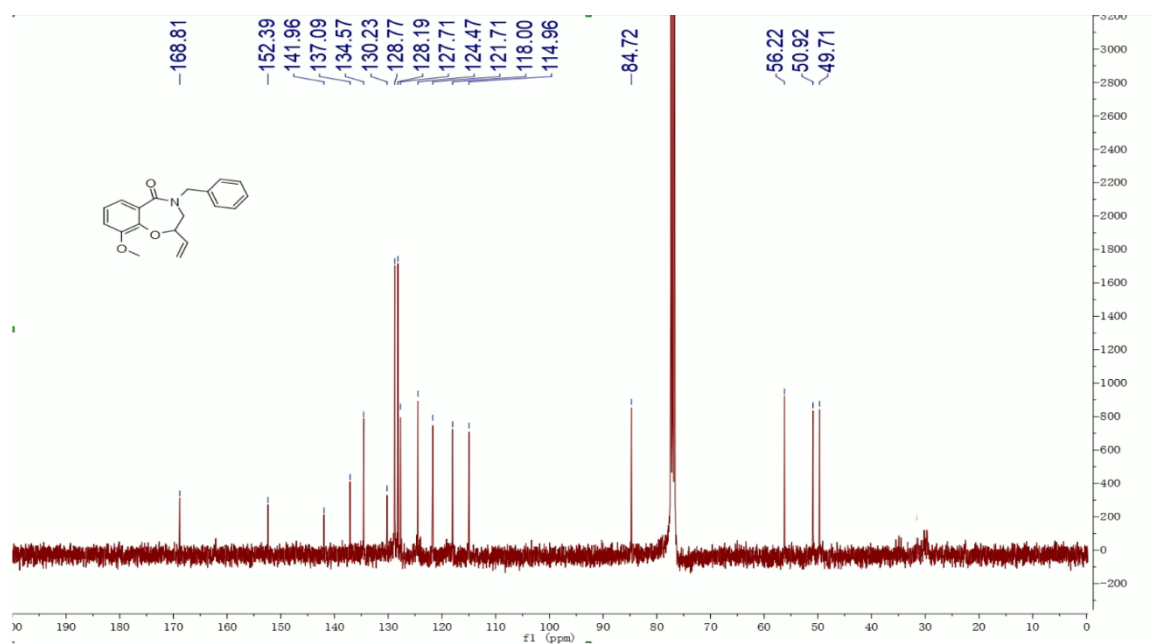

4-Benzyl-8-methoxy-2-vinyl-3,4-dihydrobenzo[*f*][1,4]oxazepin-5(2*H*)-one (2f)

Figure 60.  $^1\text{H}$  NMR (400 MHz,  $\text{CDCl}_3$ ) spectrum of 2f

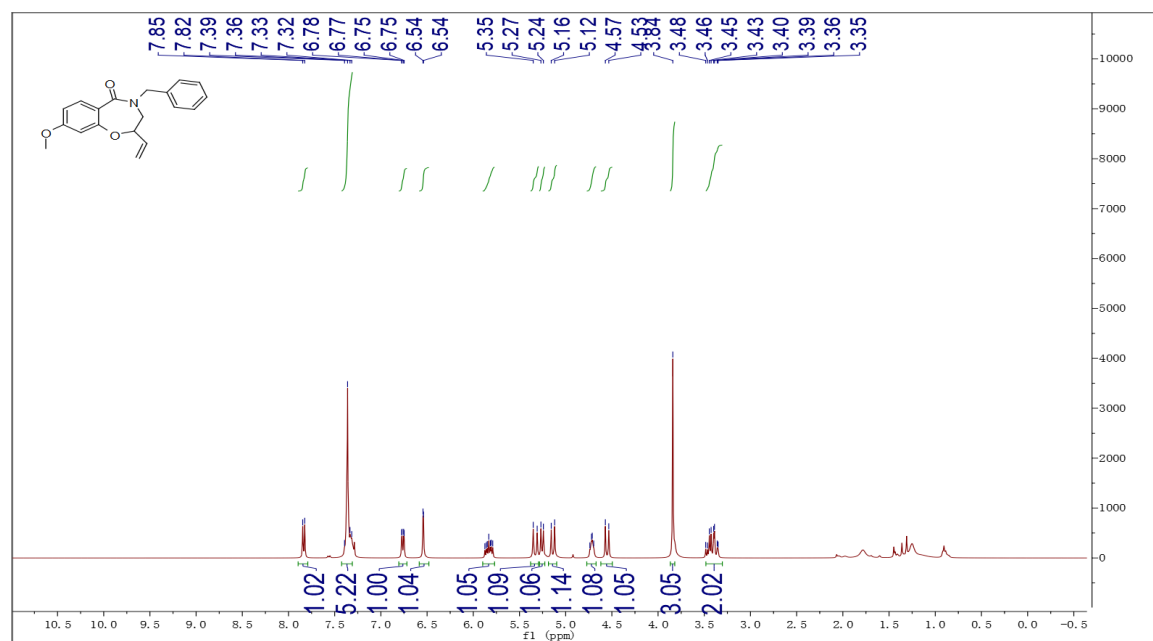

Figure 61.  $^{13}\text{C}$  NMR (100 MHz,  $\text{CDCl}_3$ ) spectrum of **2f**

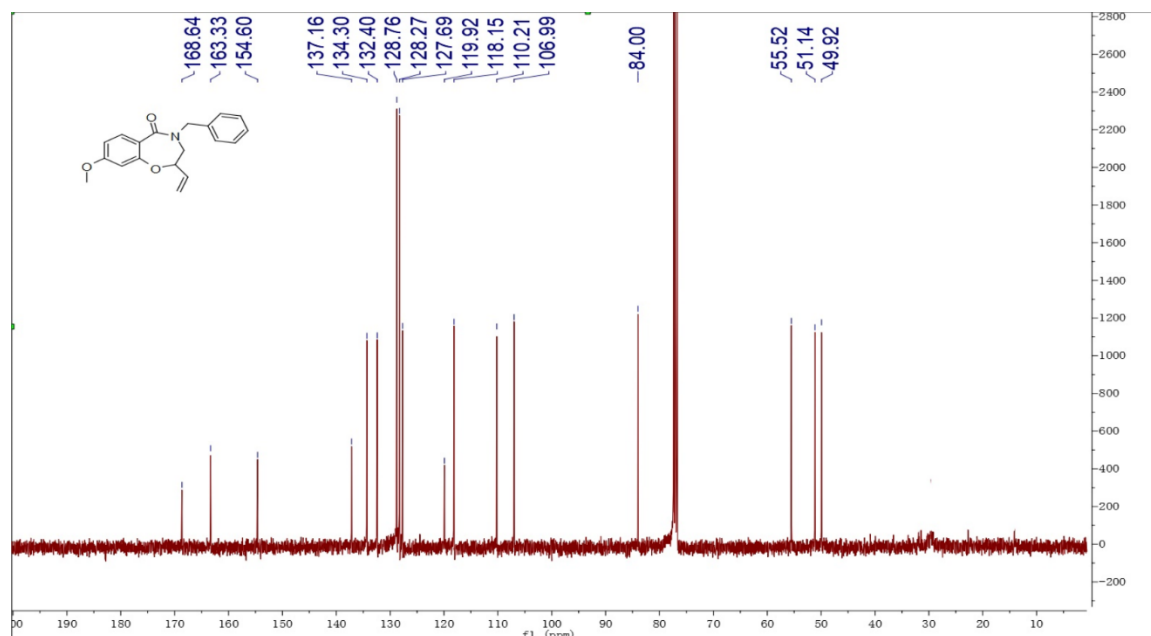

**4-Benzyl-7-methoxy-2-vinyl-3,4-dihydrobenzo[*f*][1,4]oxazepin-5(2*H*)-one (2g)**

Figure 62.  $^1\text{H}$  NMR (400 MHz,  $\text{CDCl}_3$ ) spectrum of **2g**

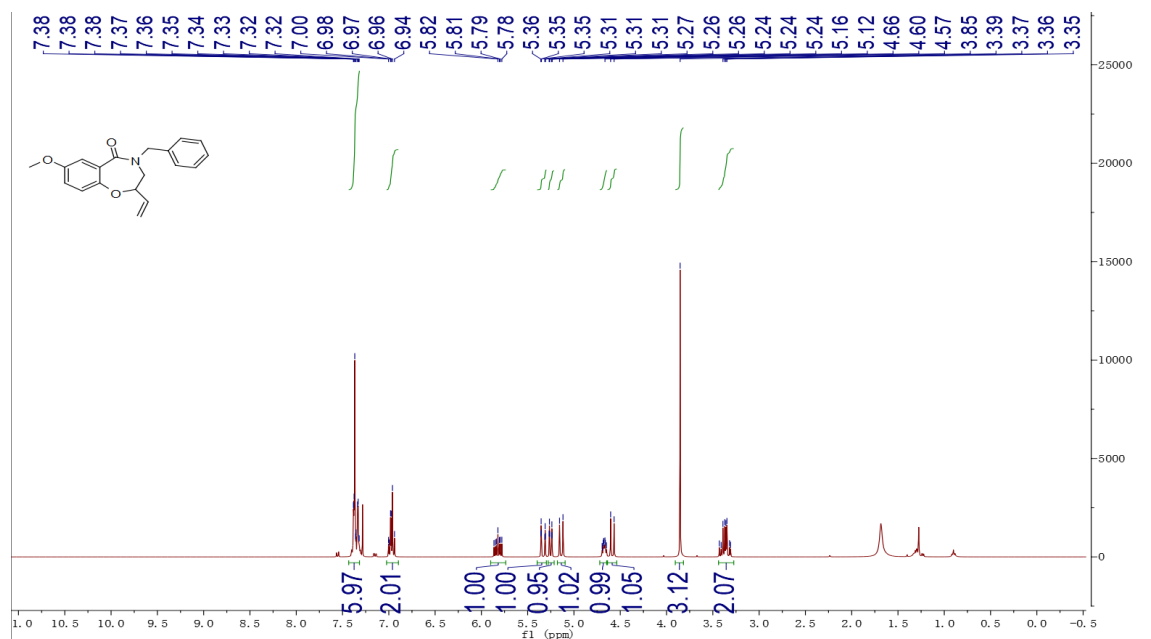

Figure 63.  $^{13}\text{C}$  NMR (100 MHz,  $\text{CDCl}_3$ ) spectrum of 2g

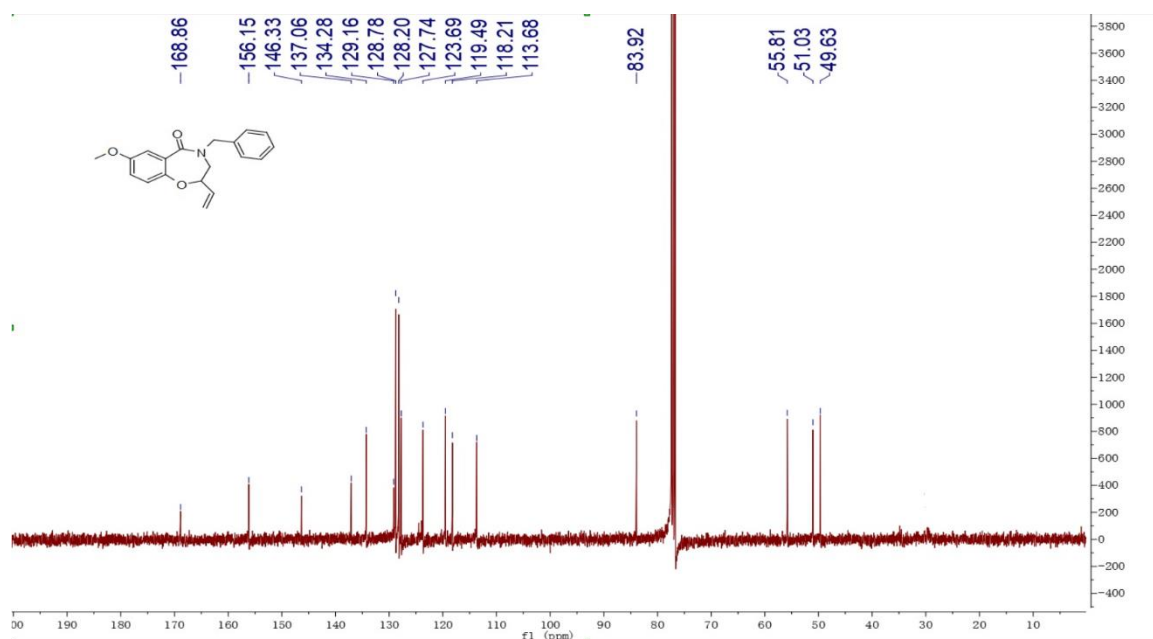

4-Benzyl-6-methoxy-2-vinyl-3,4-dihydrobenzo[*f*][1,4]oxazepin-5(2*H*)-one (2h)

Figure 64.  $^1\text{H}$  NMR (400 MHz,  $\text{CDCl}_3$ ) spectrum of 2h

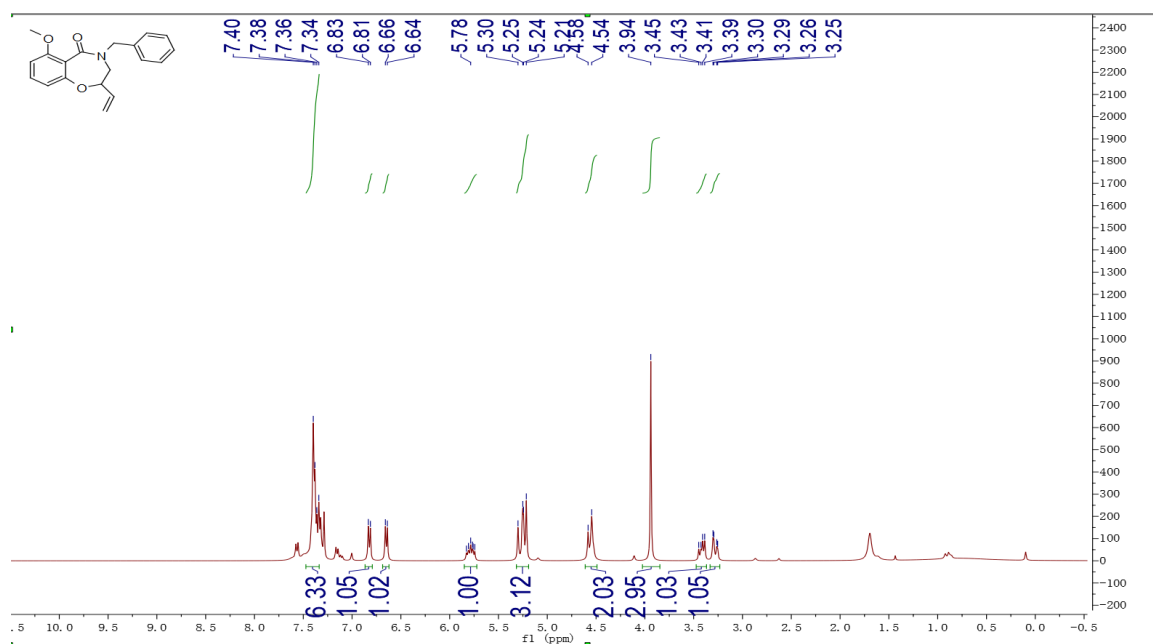

Figure 65.  $^{13}\text{C}$  NMR (100 MHz,  $\text{CDCl}_3$ ) spectrum of 2h

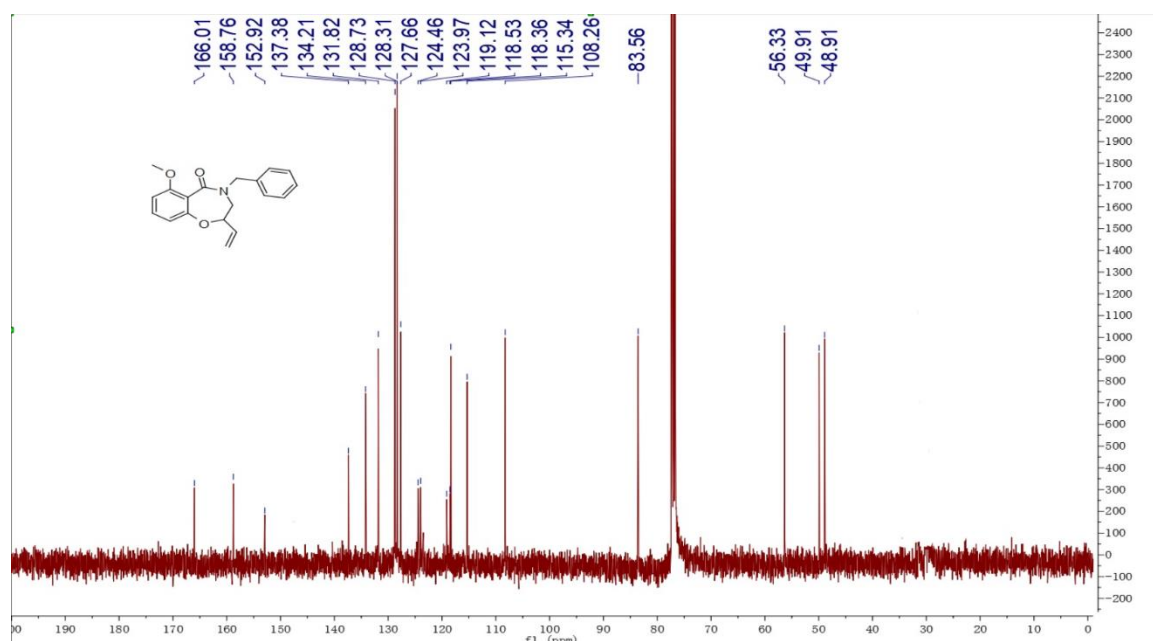

4-Benzyl-8-fluoro-2-vinyl-3,4-dihydrobenzo[f][1,4]oxazepin-5(2H)-one (2i)

Figure 66.  $^1\text{H}$  NMR (400 MHz,  $\text{CDCl}_3$ ) spectrum of 2i

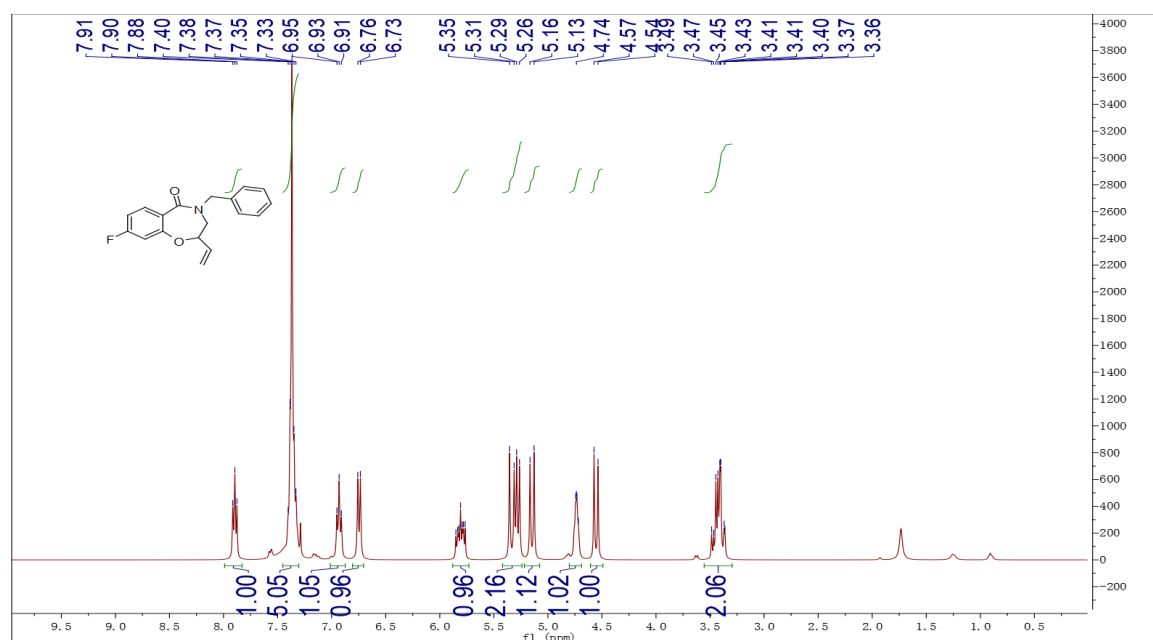

Figure 67.  $^{13}\text{C}$  NMR (100 MHz,  $\text{CDCl}_3$ ) spectrum of 2i

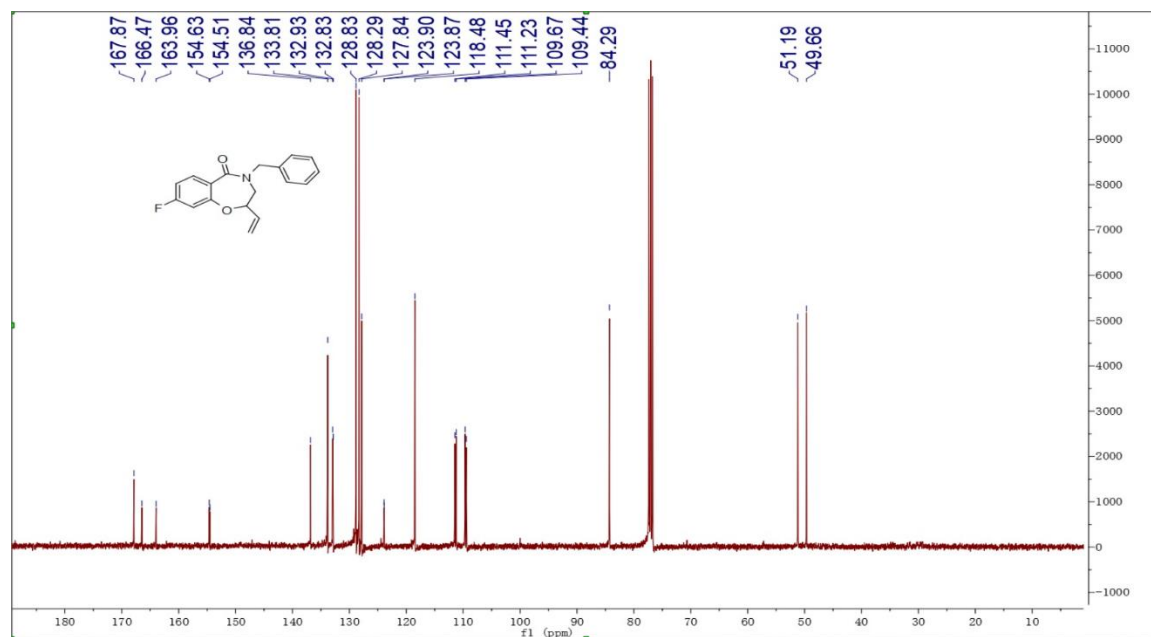

Figure 68.  $^{19}\text{F}$  NMR (376 MHz,  $\text{CDCl}_3$ ) spectrum of 2i

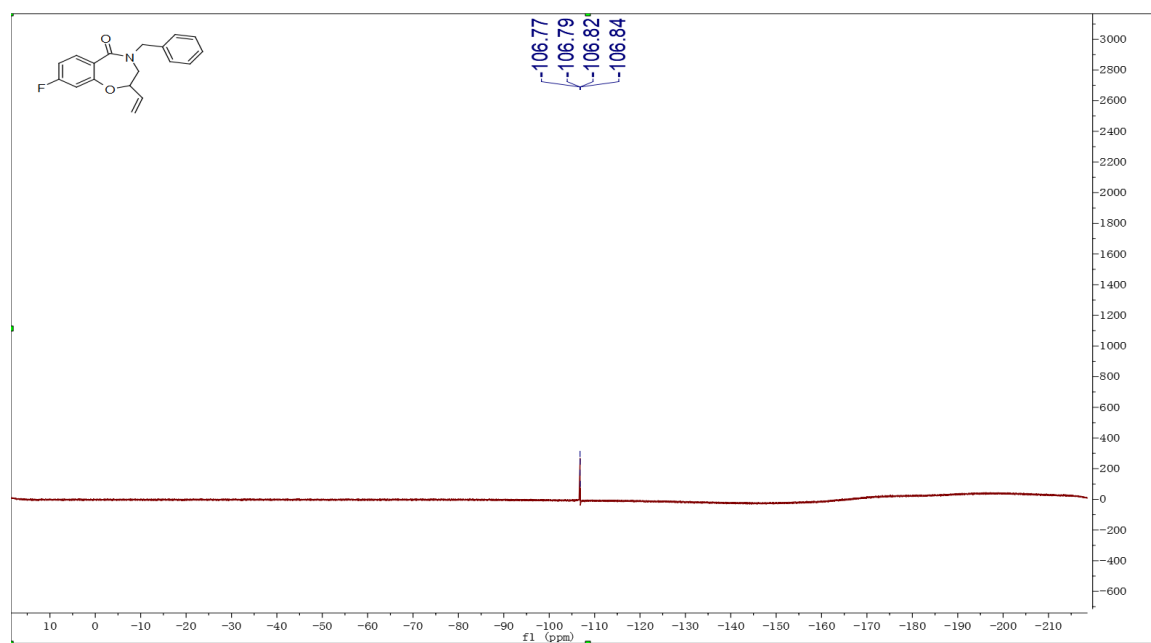

**4-Benzyl-7-fluoro-2-vinyl-3,4-dihydrobenzo[f][1,4]oxazepin-5(2H)-one (2j)**

**Figure 69. <sup>1</sup>H NMR (400 MHz, CDCl<sub>3</sub>) spectrum of 2j**

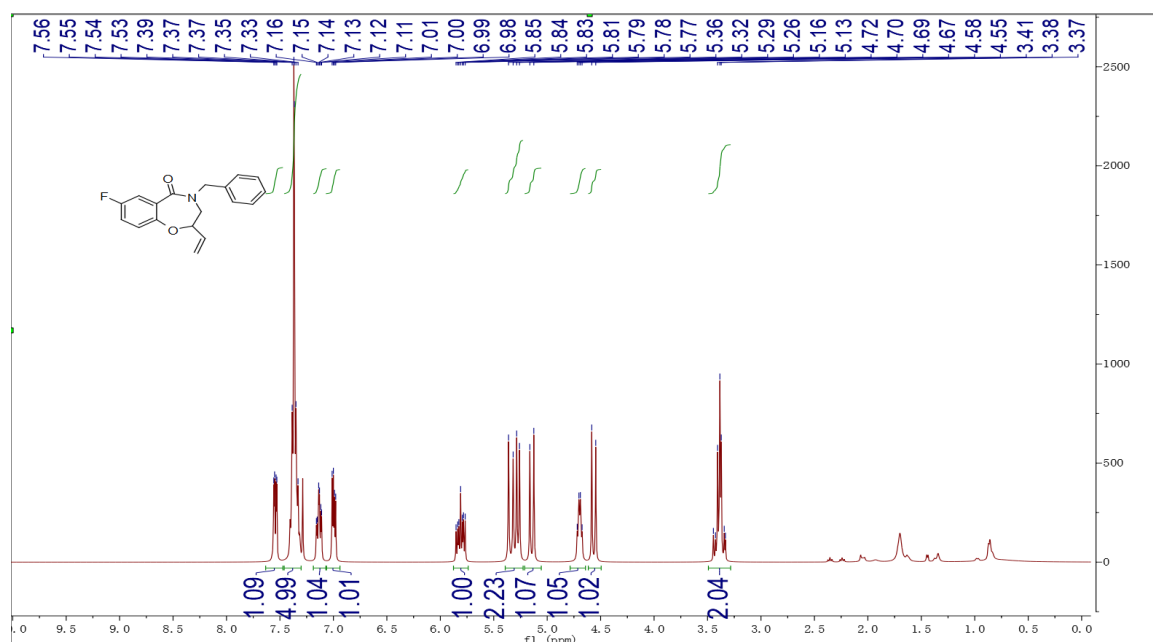

**Figure 70. <sup>13</sup>C NMR (100 MHz, CDCl<sub>3</sub>) spectrum of 2j**

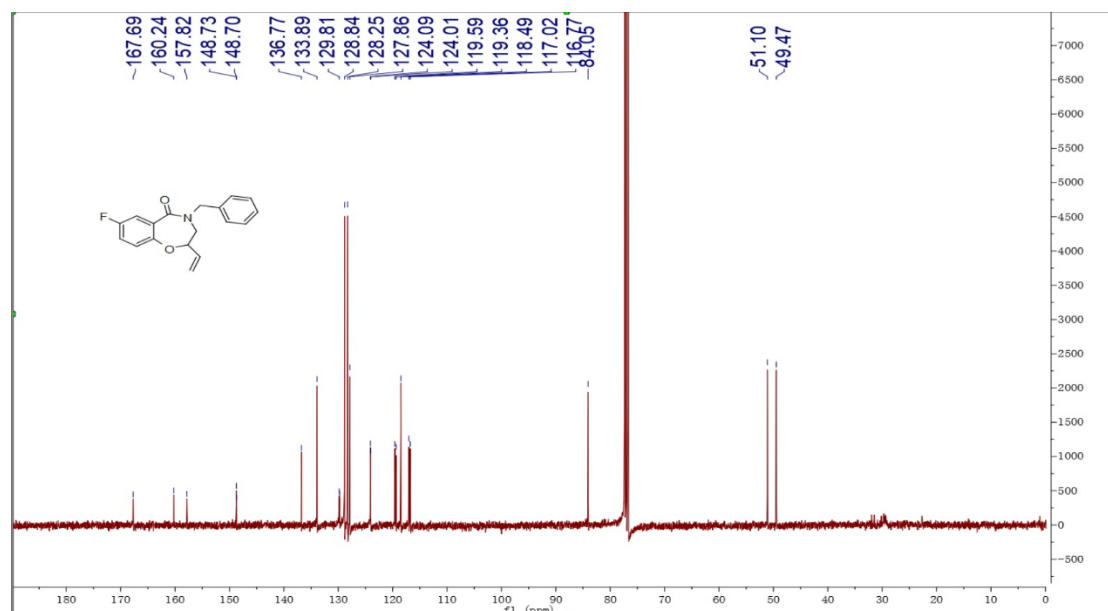

**Figure 71.**  $^{19}\text{F}$  NMR (376 MHz,  $\text{CDCl}_3$ ) spectrum of **2j**

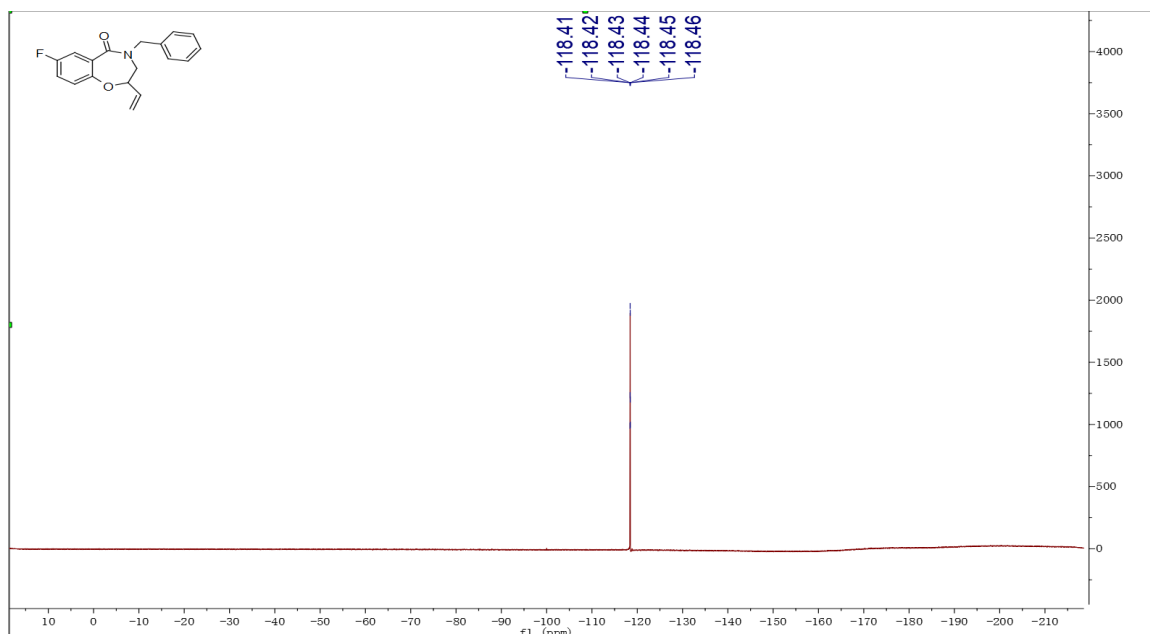

**4-Benzyl-8-chloro-2-vinyl-3,4-dihydrobenzo[f][1,4]oxazepin-5(2H)-one (2k)**

**Figure 72.**  $^1\text{H}$  NMR (400 MHz,  $\text{CDCl}_3$ ) spectrum of **2k**

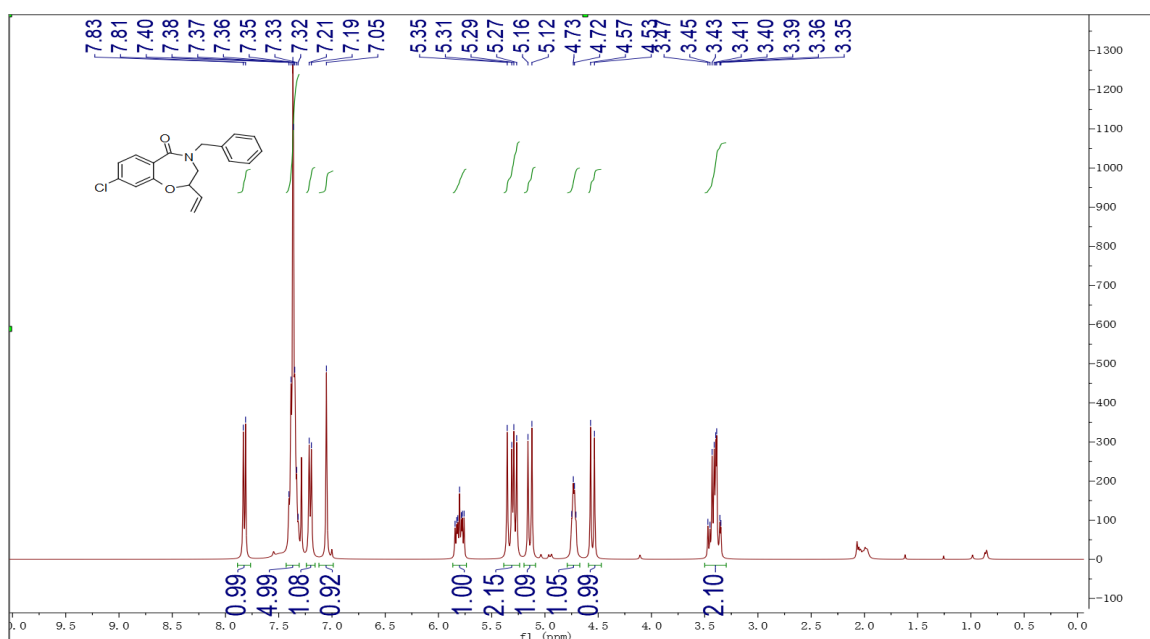

Figure 73.  $^{13}\text{C}$  NMR (100 MHz,  $\text{CDCl}_3$ ) spectrum of 2k

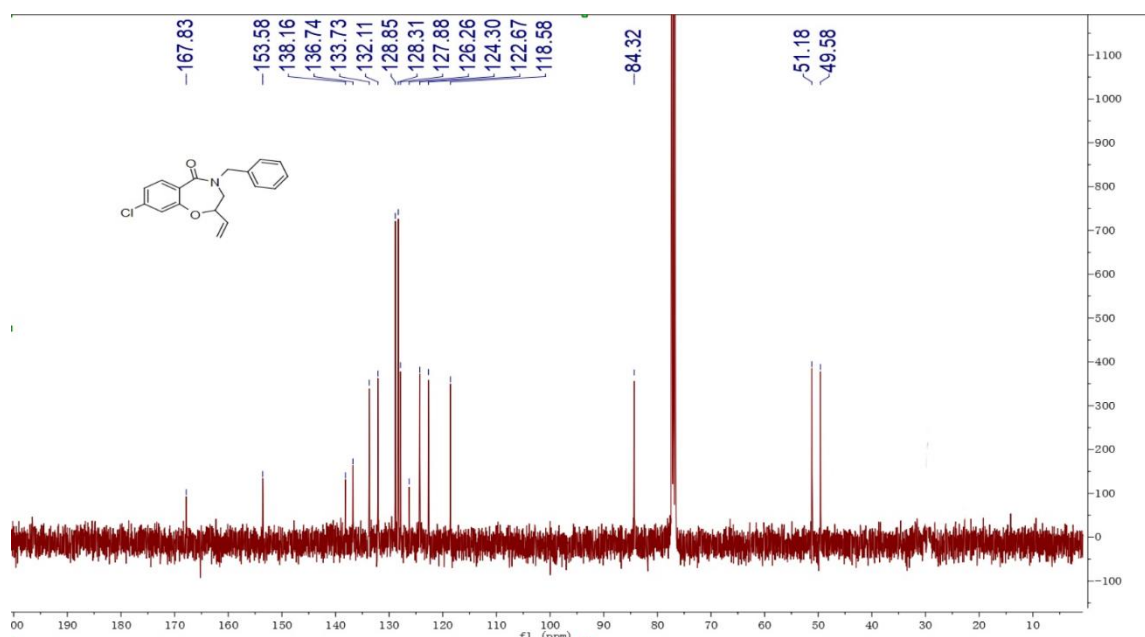

4-Benzyl-7-chloro-2-vinyl-3,4-dihydrobenzo[*f*][1,4]oxazepin-5(2*H*)-one (2l)

Figure 74.  $^1\text{H}$  NMR (400 MHz,  $\text{CDCl}_3$ ) spectrum of 2l

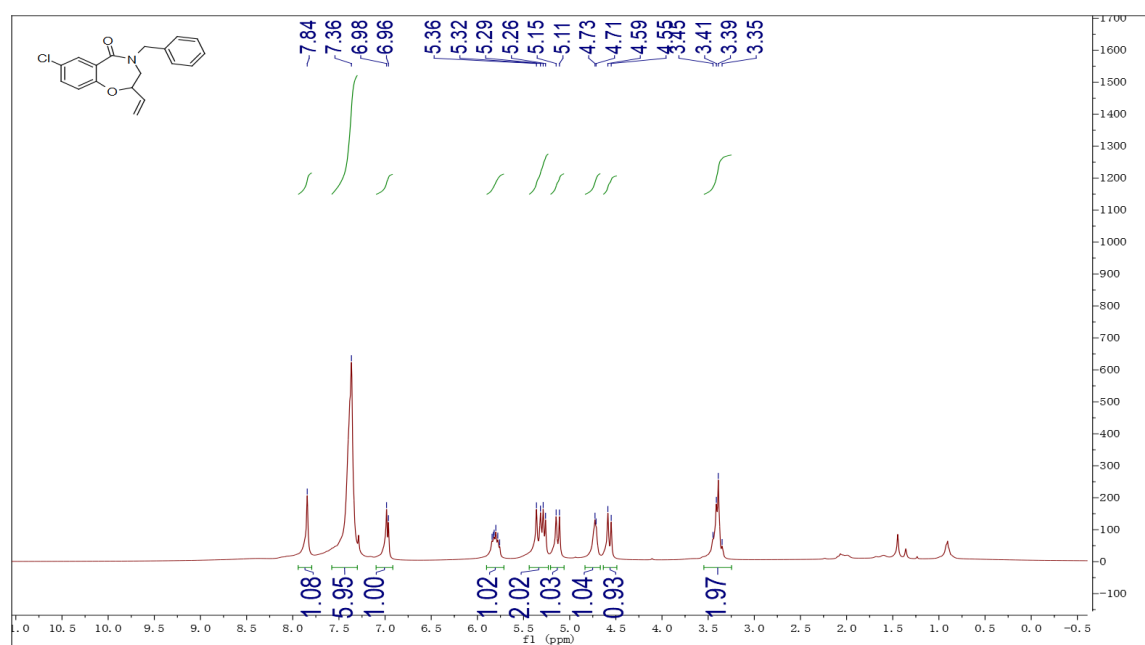



Figure 75.  $^{13}\text{C}$  NMR (100 MHz,  $\text{CDCl}_3$ ) spectrum of 2l

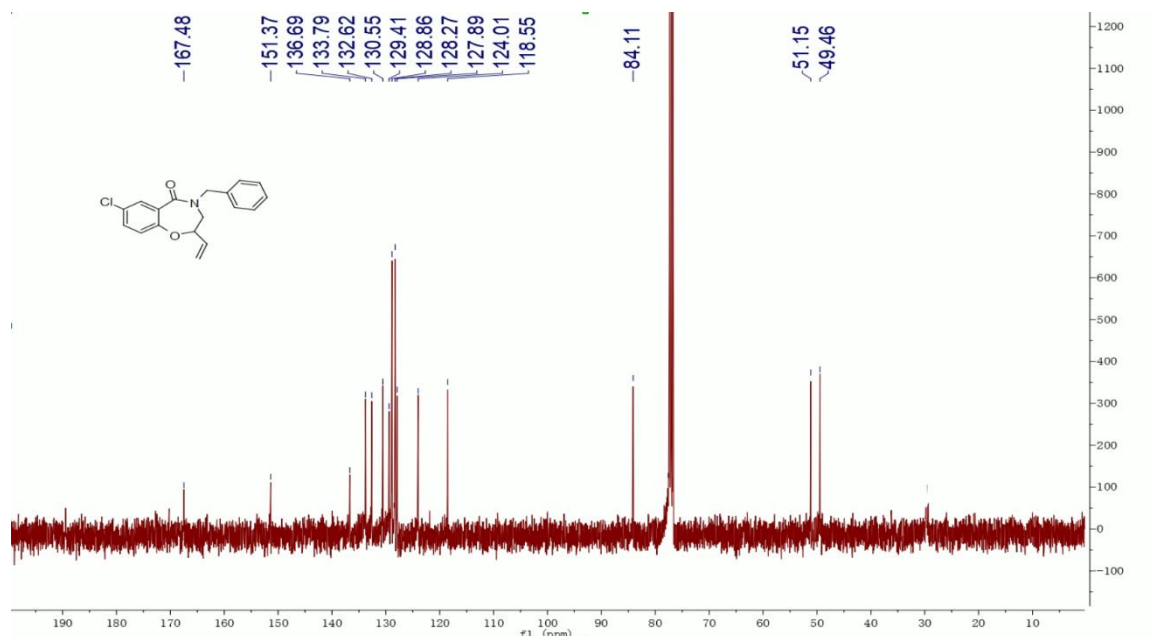

4-Benzyl-7-bromo-2-vinyl-3,4-dihydrobenzo[*f*][1,4]oxazepin-5(2*H*)-one (2m)

Figure 76.  $^1\text{H}$  NMR (400 MHz,  $\text{CDCl}_3$ ) spectrum of 2m

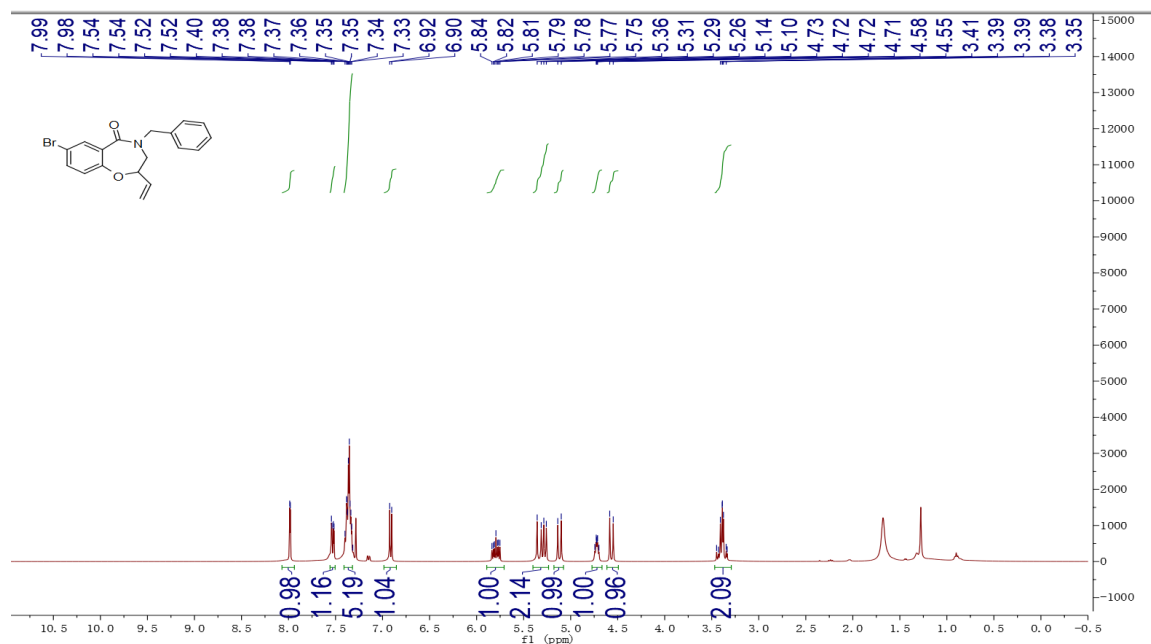

Figure 77.  $^{13}\text{C}$  NMR (100 MHz,  $\text{CDCl}_3$ ) spectrum of 2m

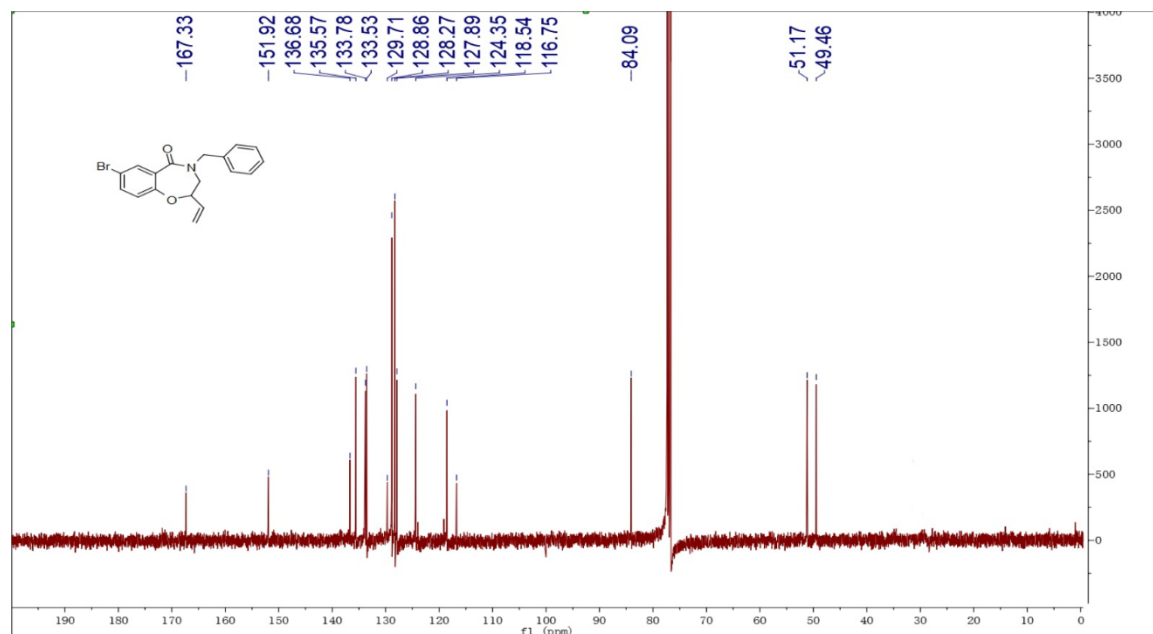

4-Benzyl-8-nitro-2-vinyl-3,4-dihydrobenzo[*f*][1,4]oxazepin-5(2*H*)-one (2n)

Figure 78.  $^1\text{H}$  NMR (400 MHz,  $\text{CDCl}_3$ ) spectrum of 2n

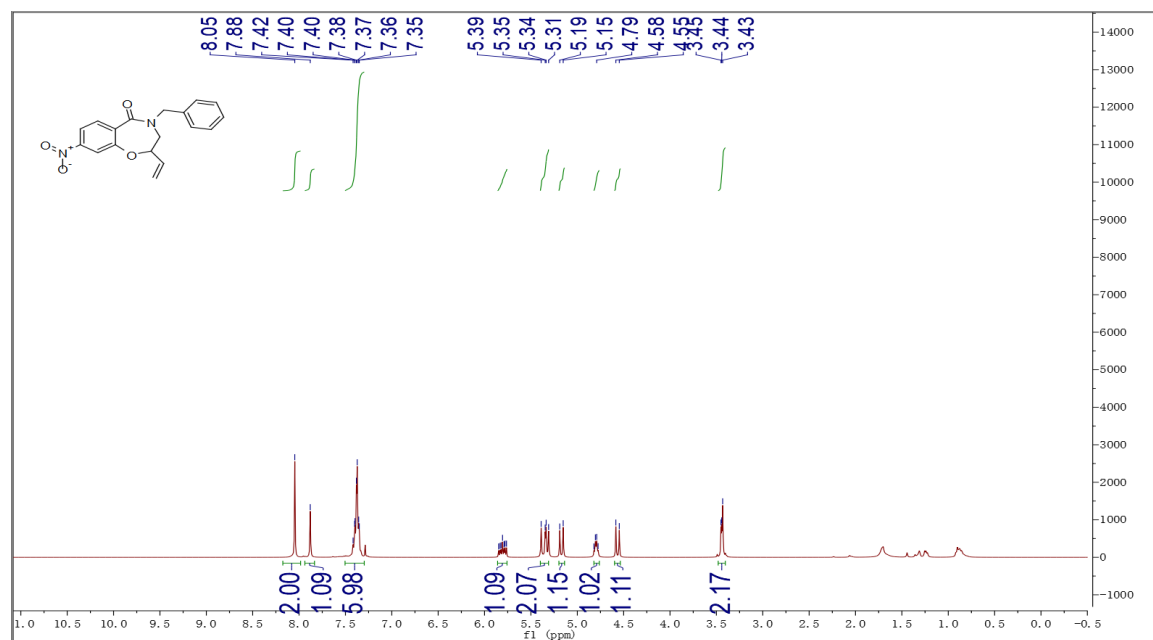

**Figure 79.**  $^{13}\text{C}$  NMR (100 MHz,  $\text{CDCl}_3$ ) spectrum of **2n**

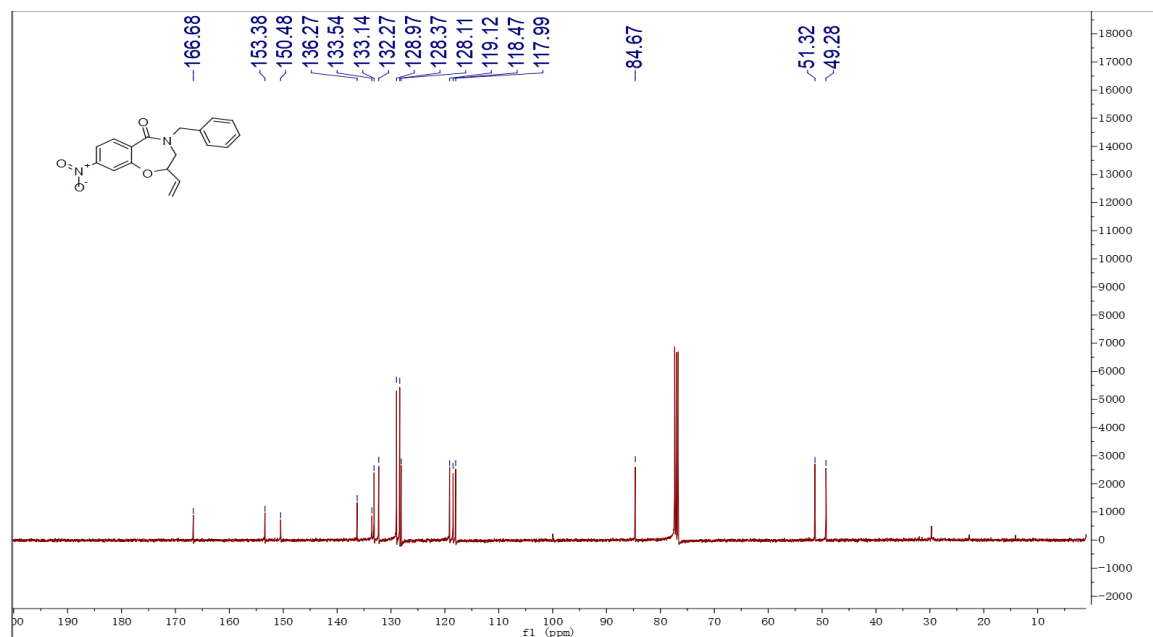

**4-Benzyl-8-(trifluoromethyl)-2-vinyl-3,4-dihydrobenzo[f][1,4]oxazepin-5(2H)-one (2o)**

**Figure 80.**  $^1\text{H}$  NMR (400 MHz,  $\text{CDCl}_3$ ) spectrum of **2o**

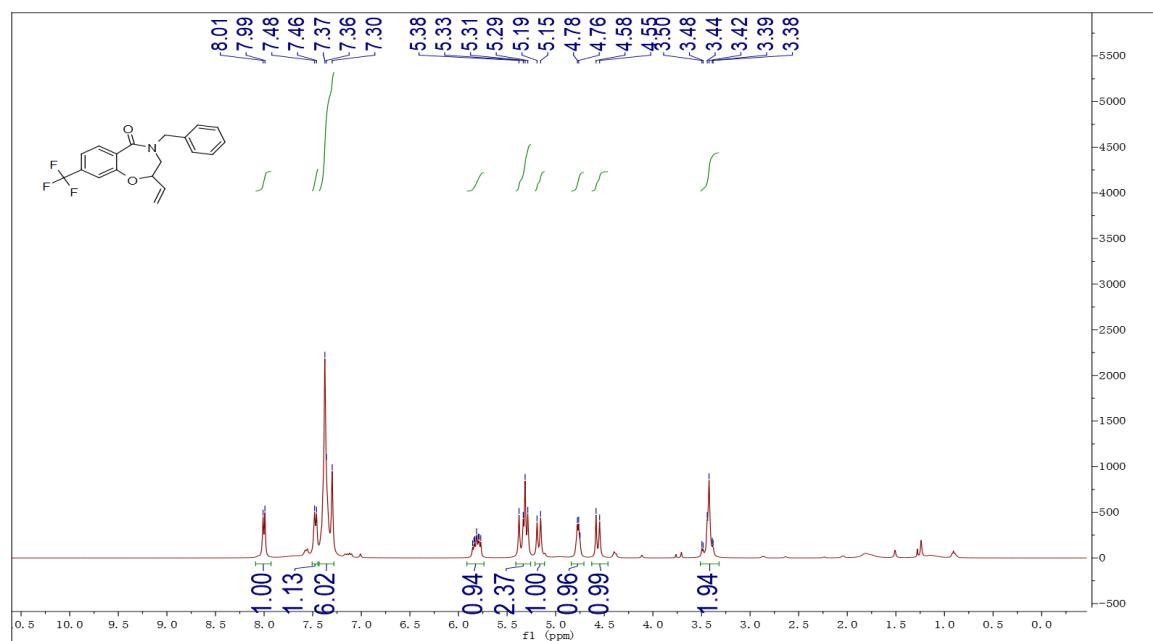

**Figure 81.**  $^{13}\text{C}$  NMR (100 MHz,  $\text{CDCl}_3$ ) spectrum of **2o**

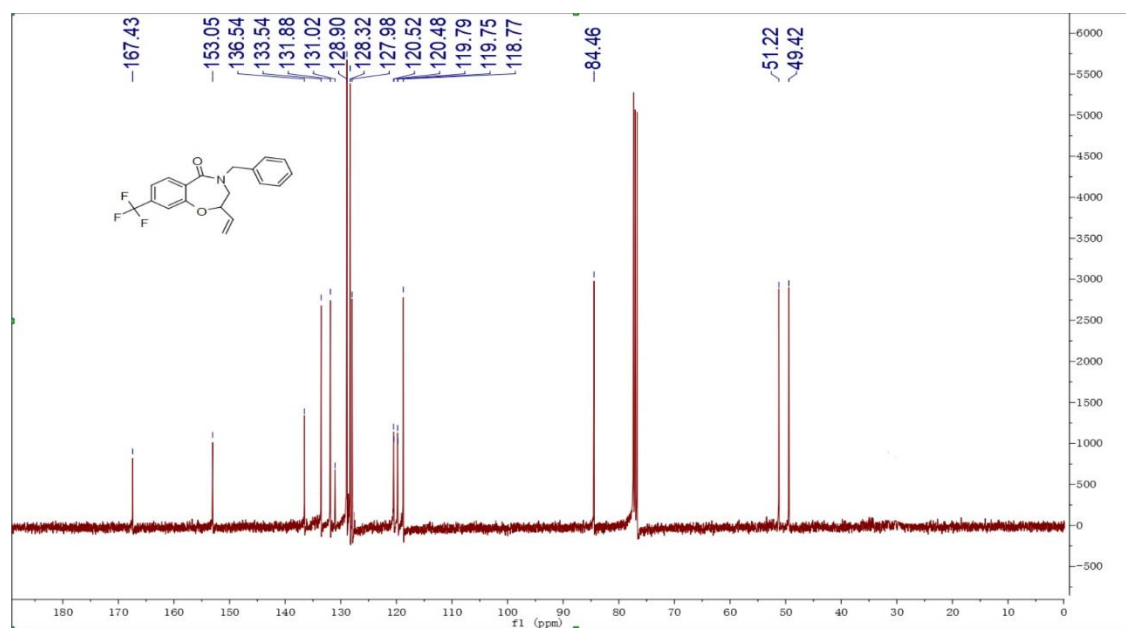

**Figure 82.**  $^{19}\text{F}$  NMR (376 MHz,  $\text{CDCl}_3$ ) spectrum of **2o**

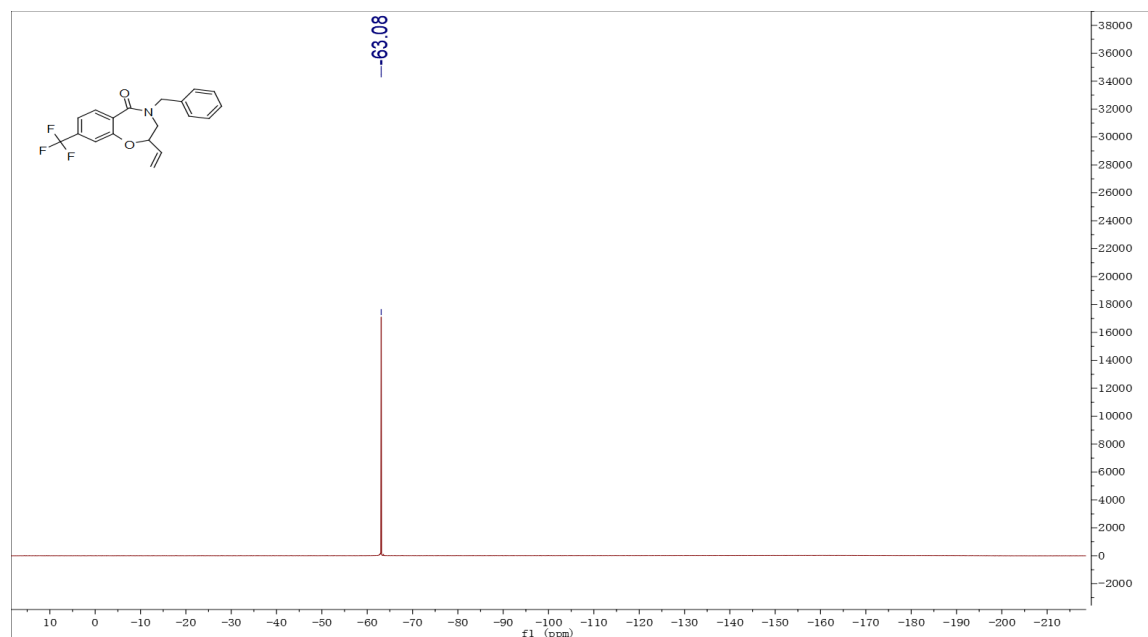

4-Benzyl-2-vinyl-3,4-dihydronaphtho[2,3-f][1,4]oxazepin-5(2H)-one (2p)

Figure 83.  $^1\text{H}$  NMR (400 MHz,  $\text{CDCl}_3$ ) spectrum of 2p

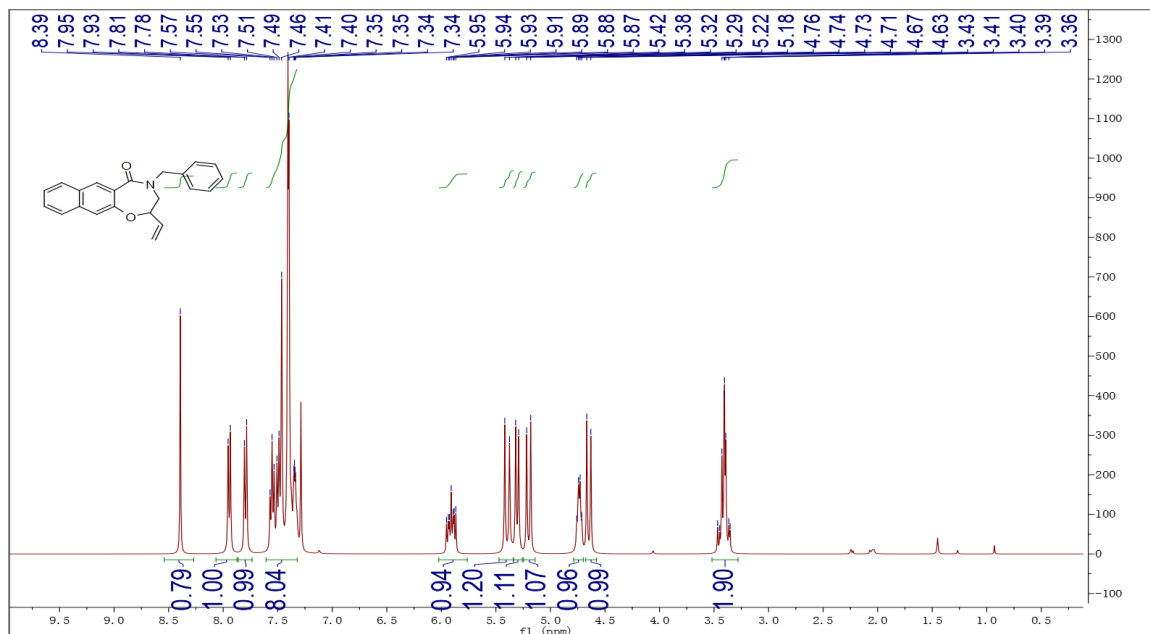

Figure 84.  $^{13}\text{C}$  NMR (100 MHz,  $\text{CDCl}_3$ ) spectrum of 2p

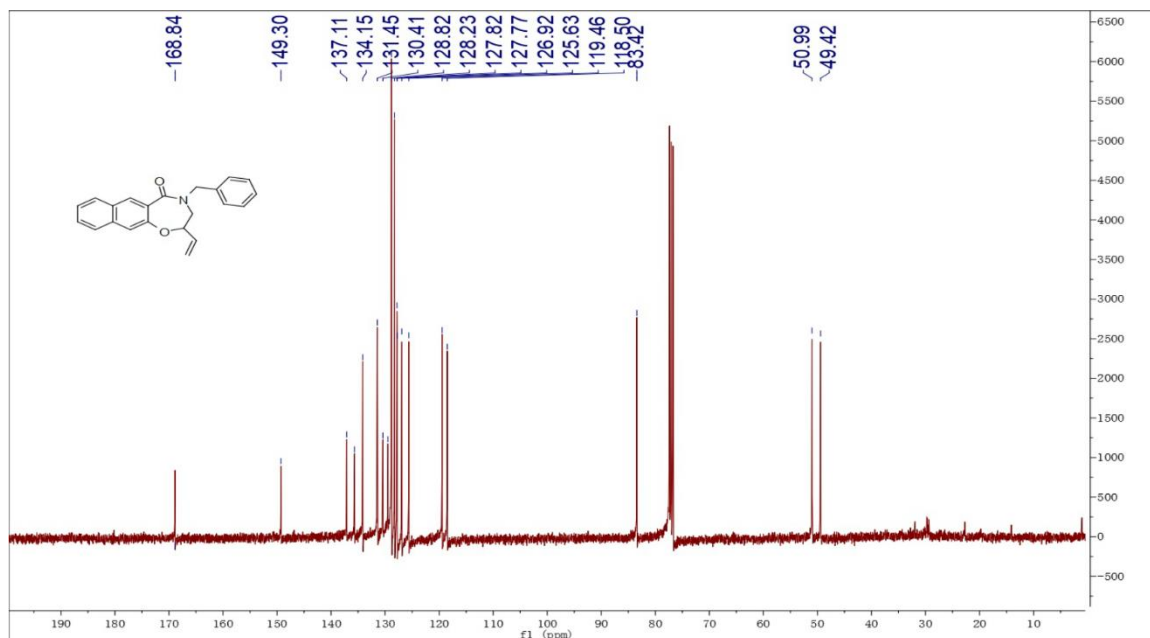

4-Benzyl-2-vinyl-3,4-dihydropyrido[4,3-f][1,4]oxazepin-5(2H)-one (2q)

Figure 85. <sup>1</sup>H NMR (400 MHz, CDCl<sub>3</sub>) spectrum of 2q

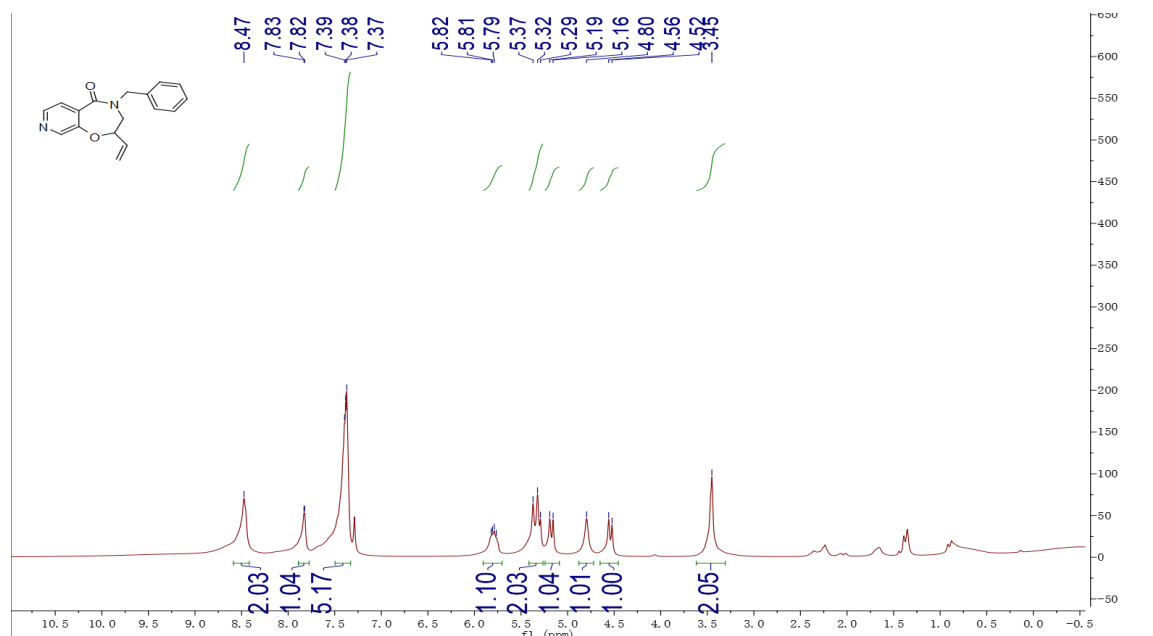

Figure 86. <sup>13</sup>C NMR (100 MHz, CDCl<sub>3</sub>) spectrum of 2q

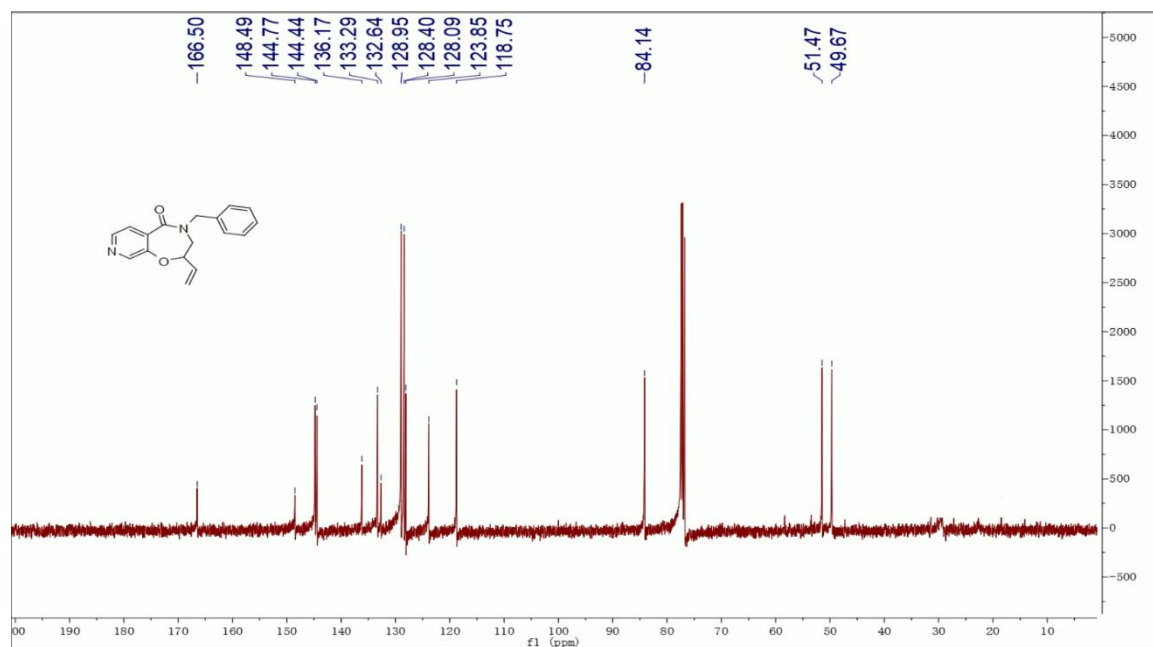

**4-Benzyl-8-(thiophen-3-yl)-2-vinyl-3,4-dihydrobenzo[f][1,4]oxazepin-5(2H)-one (2r)**

**Figure 87. <sup>1</sup>H NMR (400 MHz, CDCl<sub>3</sub>) spectrum of 2r**

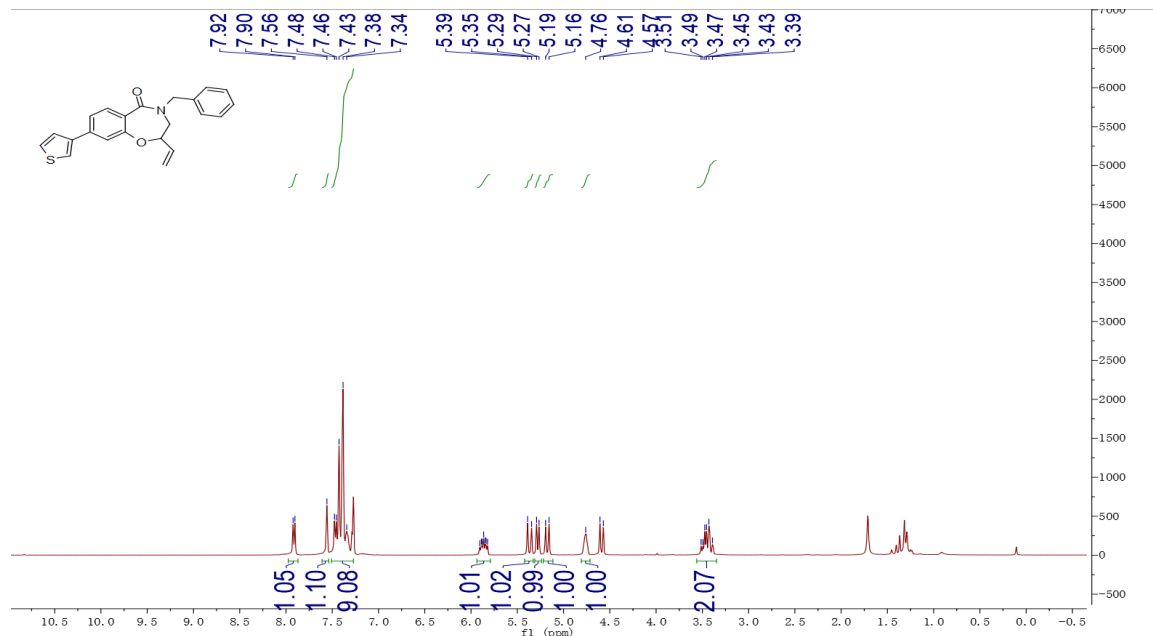

**Figure 88. <sup>13</sup>C NMR (100 MHz, CDCl<sub>3</sub>) spectrum of 2r**

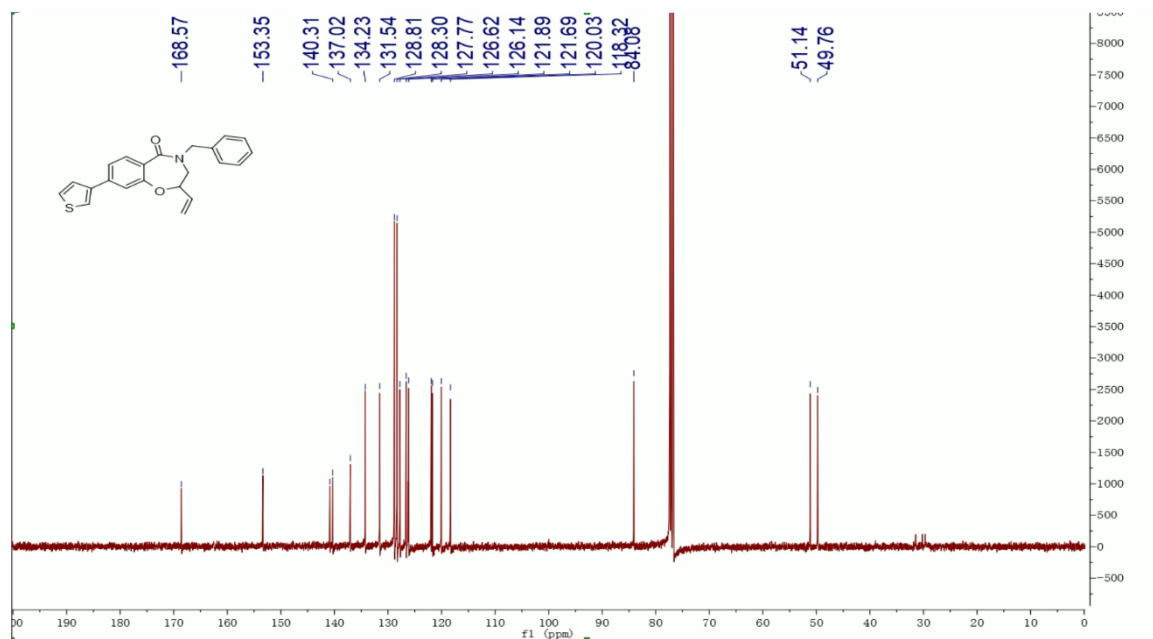

**4-Benzyl-8-(furan-2-yl)-2-vinyl-3,4-dihydrobenzo[f][1,4]oxazepin-5(2H)-one (2s)**

**Figure 89. <sup>1</sup>H NMR (400 MHz, CDCl<sub>3</sub>) spectrum of 2s**

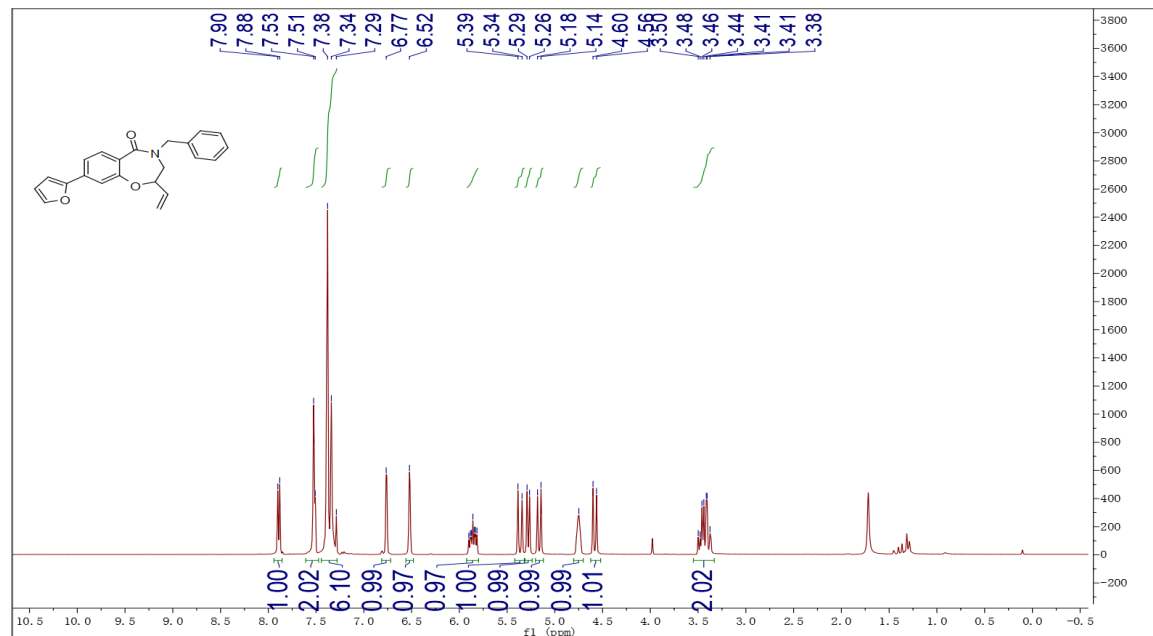

**Figure 90. <sup>13</sup>C NMR (100 MHz, CDCl<sub>3</sub>) spectrum of 2s**

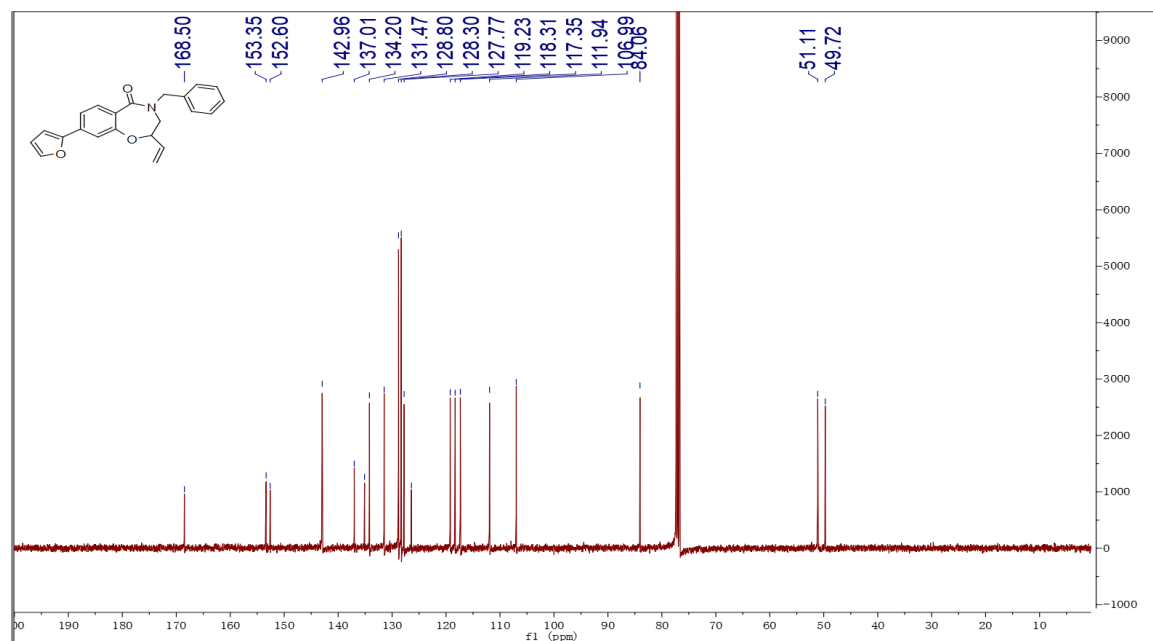



**4-Benzyl-8-(6-methoxypyridin-3-yl)-2-vinyl-3,4-dihydrobenzo[f][1,4]oxazepin-5(2H)-one (2t)**

**Figure 91.  $^1\text{H}$  NMR (400 MHz,  $\text{CDCl}_3$ ) spectrum of 2t**

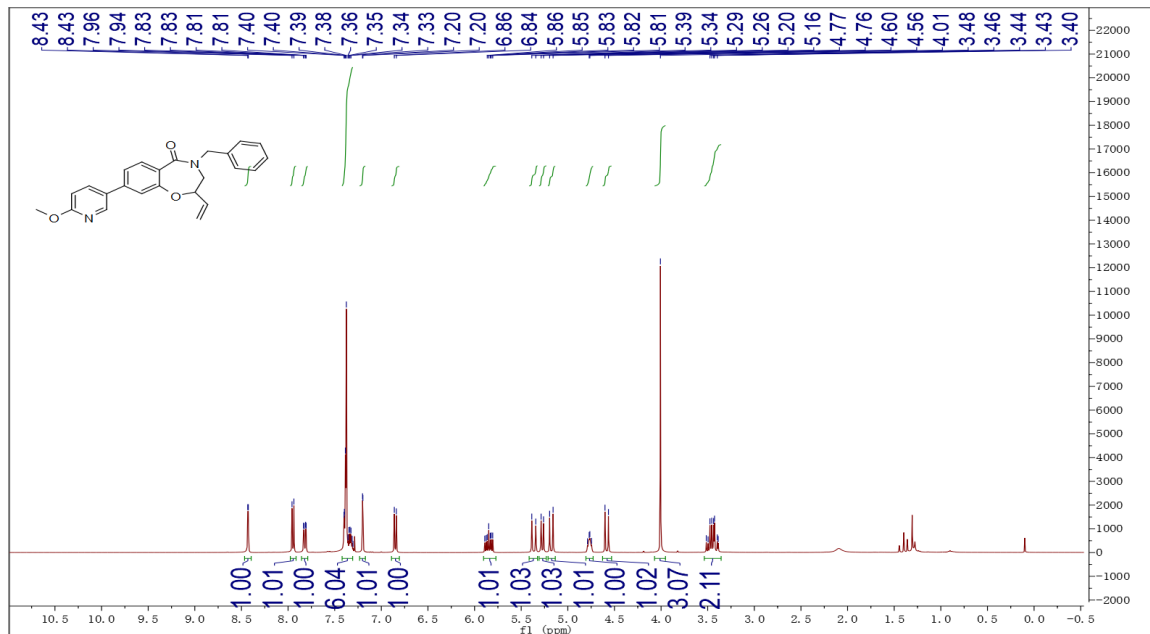

**Figure 92.  $^{13}\text{C}$  NMR (100 MHz,  $\text{CDCl}_3$ ) spectrum of 2t**

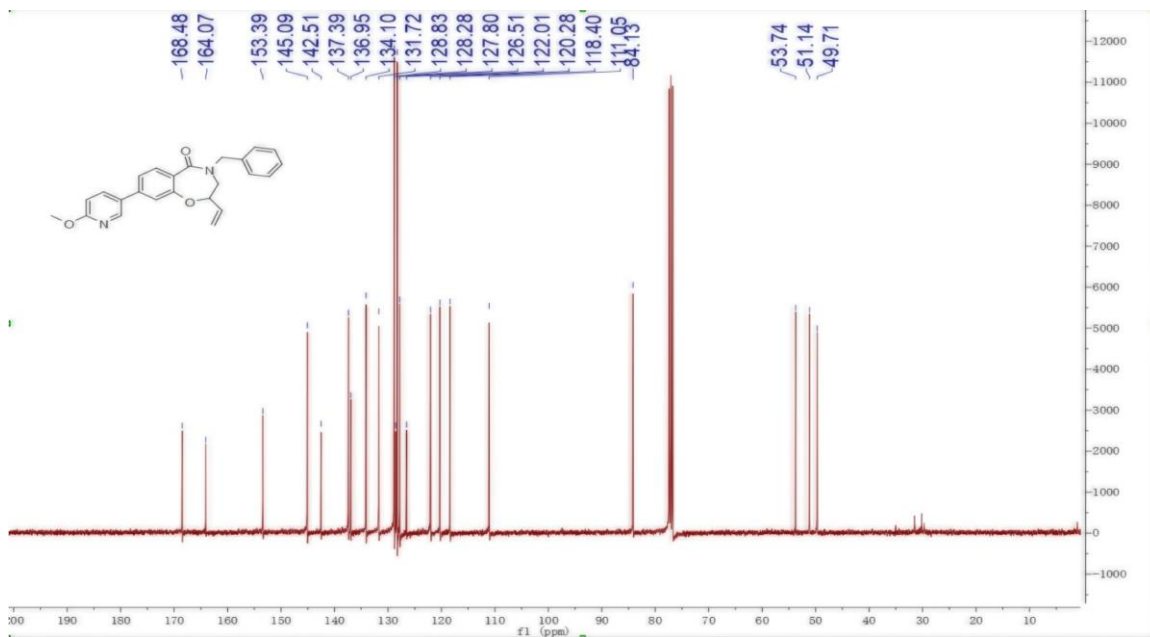

**4-Benzyl-8-(naphthalen-2-yl)-2-vinyl-3,4-dihydrobenzo[f][1,4]oxazepin-5(2H)-one (2u)**

**Figure 93. <sup>1</sup>H NMR (400 MHz, CDCl<sub>3</sub>) spectrum of 2u**

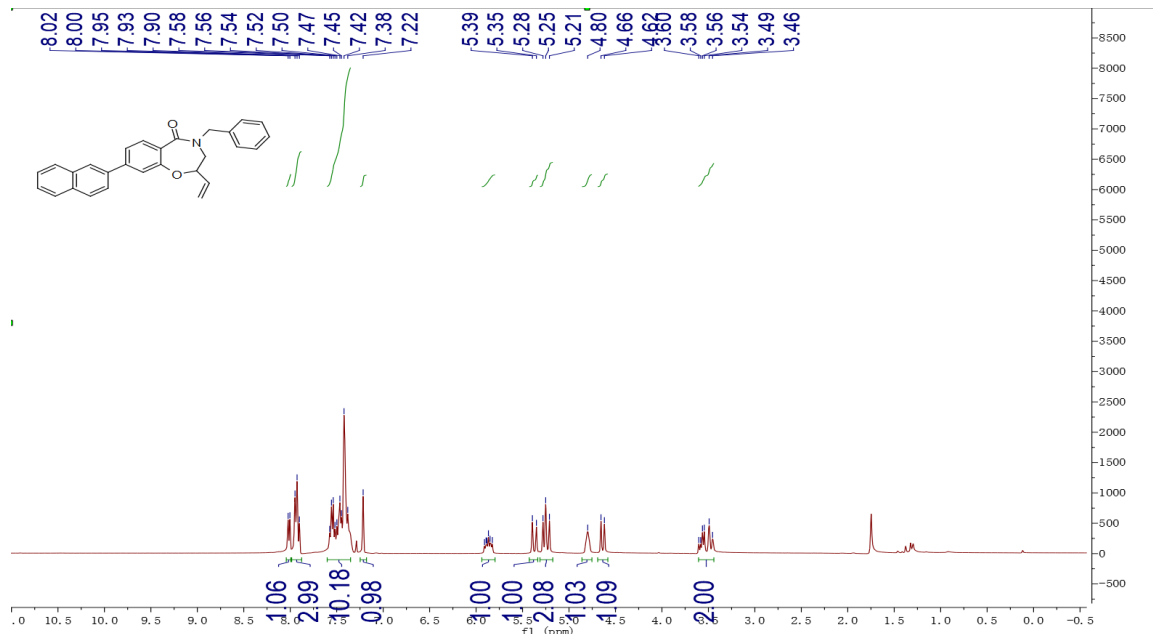

**Figure 94. <sup>13</sup>C NMR (100 MHz, CDCl<sub>3</sub>) spectrum of 2u**

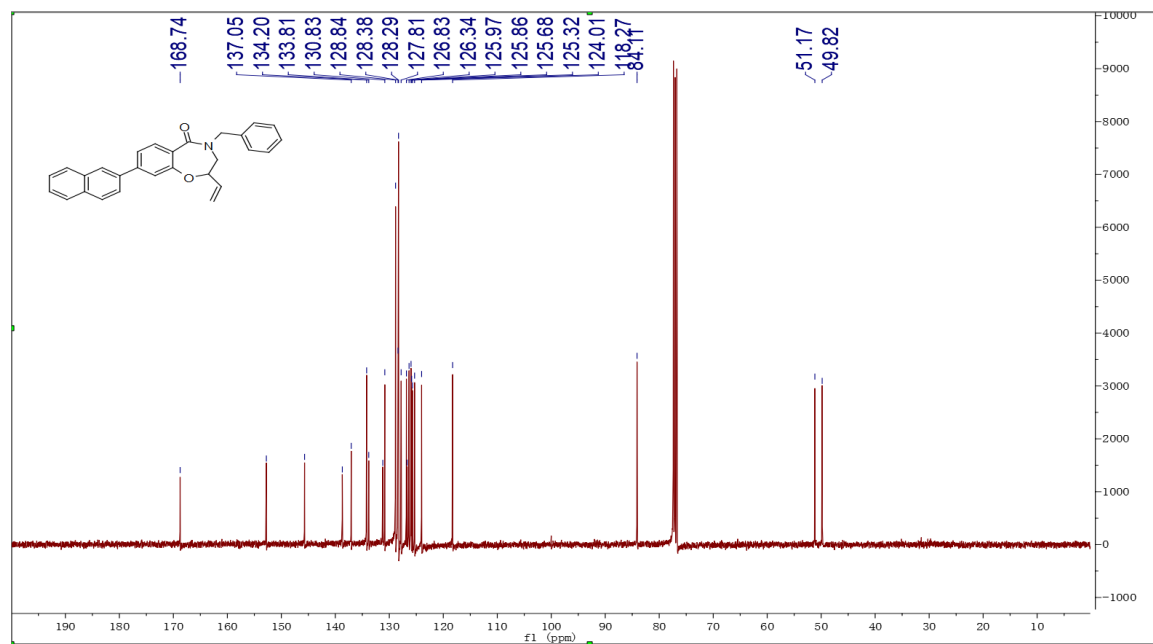

**4-(4-Methoxybenzyl)-2-vinyl-3,4-dihydrobenzo[f][1,4]oxazepin-5(2H)-one  
(2v)**

**Figure 95. <sup>1</sup>H NMR (400 MHz, CDCl<sub>3</sub>) spectrum of 2v**

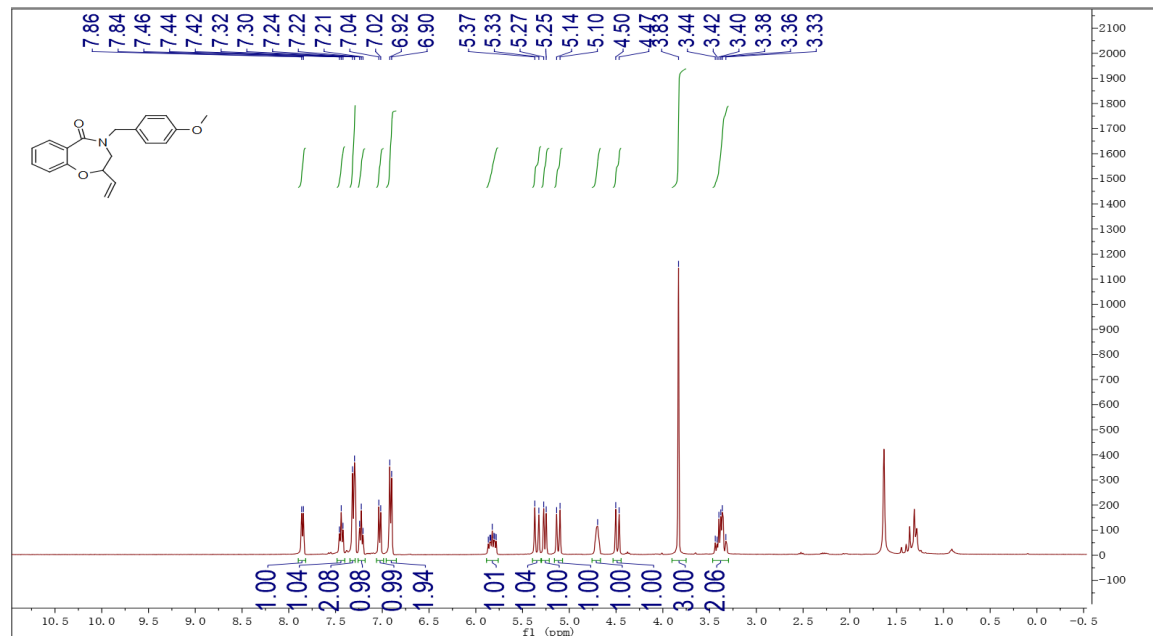

**Figure 96. <sup>13</sup>C NMR (100 MHz, CDCl<sub>3</sub>) spectrum of 2v**

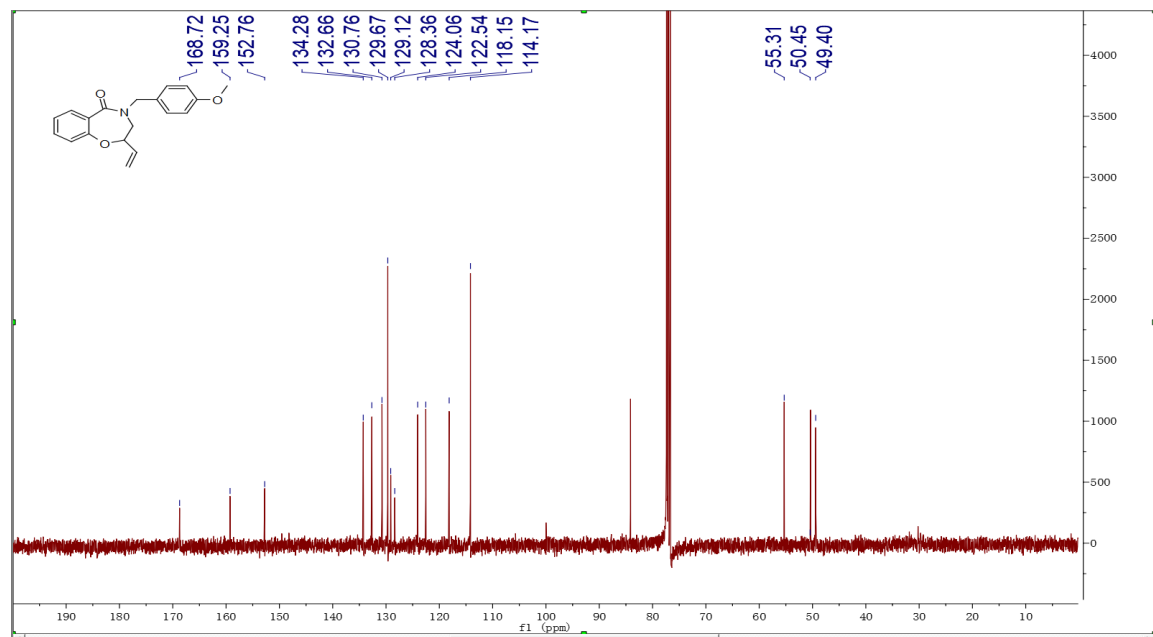

**2-vinyl-3,4-dihydrobenzo[f][1,4]oxazepin-5(2H)-one (3v)**

**Figure 97.  $^1\text{H}$  NMR (400 MHz,  $\text{CDCl}_3$ ) spectrum of 3v**

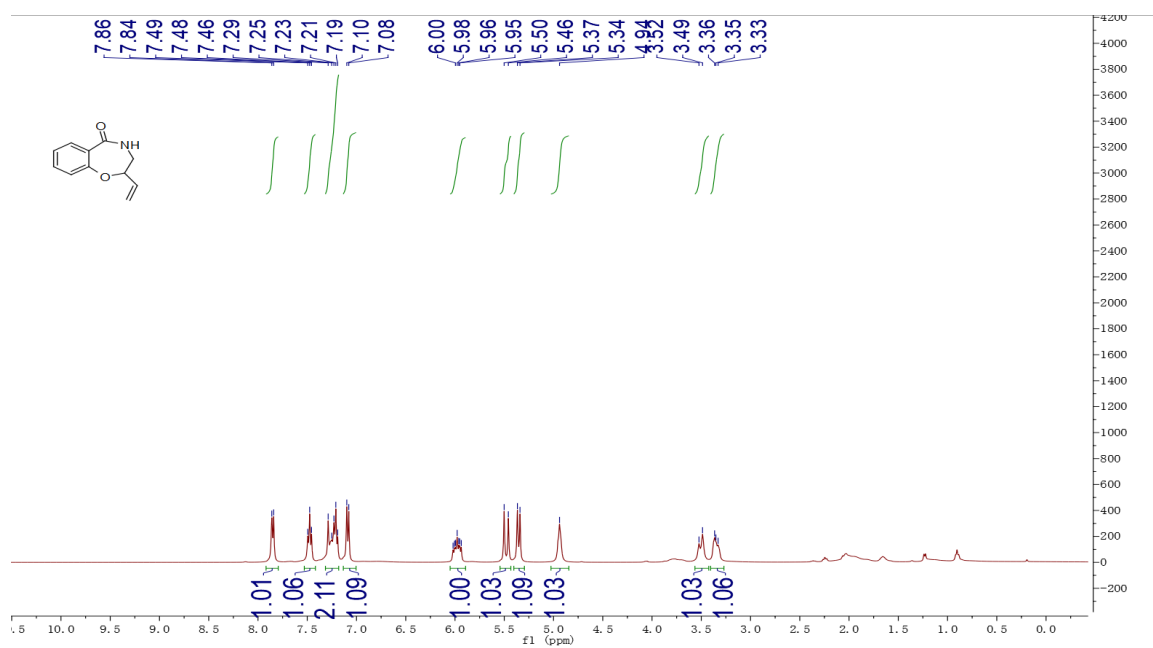

**Figure 98.  $^{13}\text{C}$  NMR (100 MHz,  $\text{CDCl}_3$ ) spectrum of 3v**

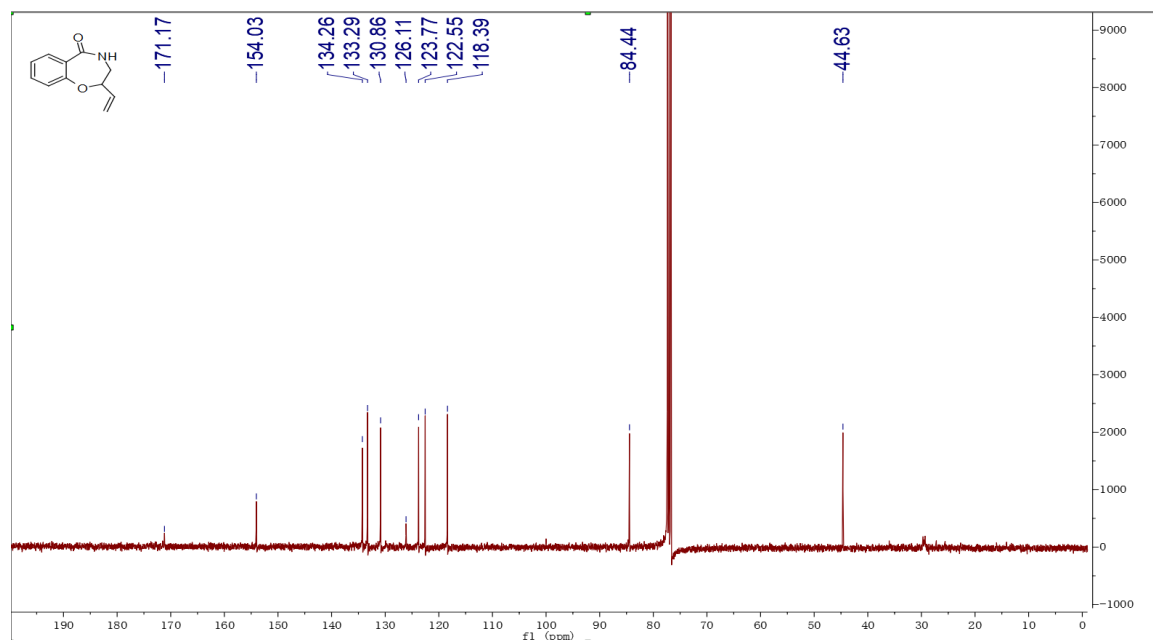

### 4-Benzyl-2-vinyl-2,3,4,5-tetrahydrobenzo[f][1,4]oxazepane (3a)

Figure 99. <sup>1</sup>H NMR (400 MHz, CDCl<sub>3</sub>) spectrum of 3a

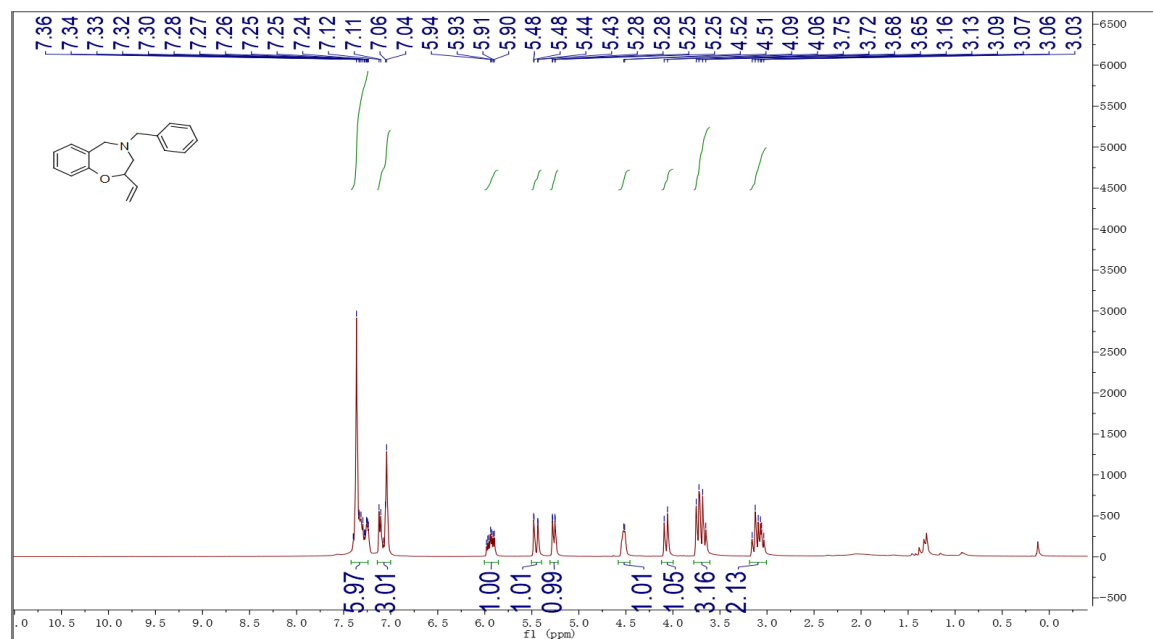

Figure 100. <sup>13</sup>C NMR (100 MHz, CDCl<sub>3</sub>) spectrum of 3a

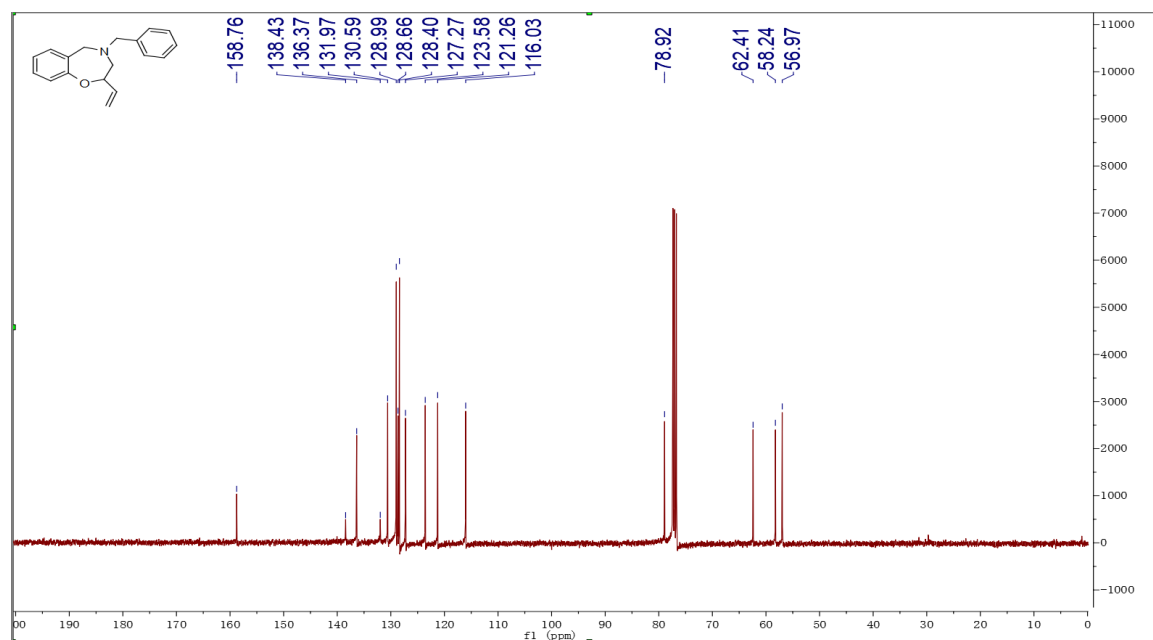

**4-Benzyl-2-(2-hydroxyethyl)-3,4-dihydro-2λ<sup>3</sup>-benzo[f][1,4]oxazepin-5(2H)-one (4a)**

**Figure 101. <sup>1</sup>H NMR (400 MHz, CDCl<sub>3</sub>) spectrum of 4a**

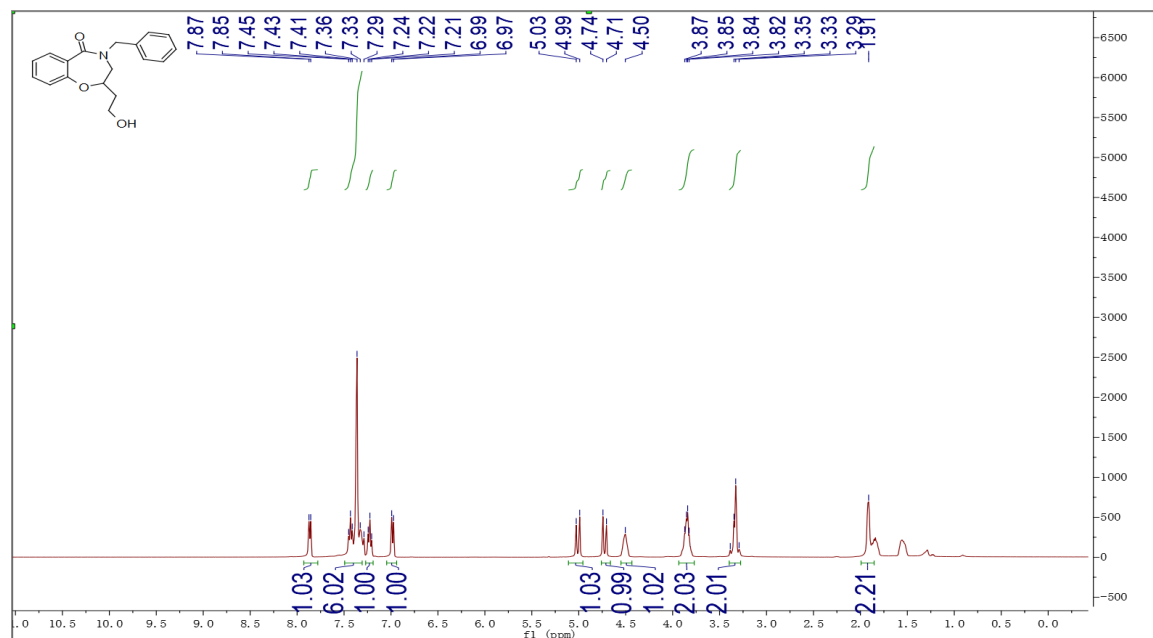

**Figure 102. <sup>13</sup>C NMR (100 MHz, CDCl<sub>3</sub>) spectrum of 4a**

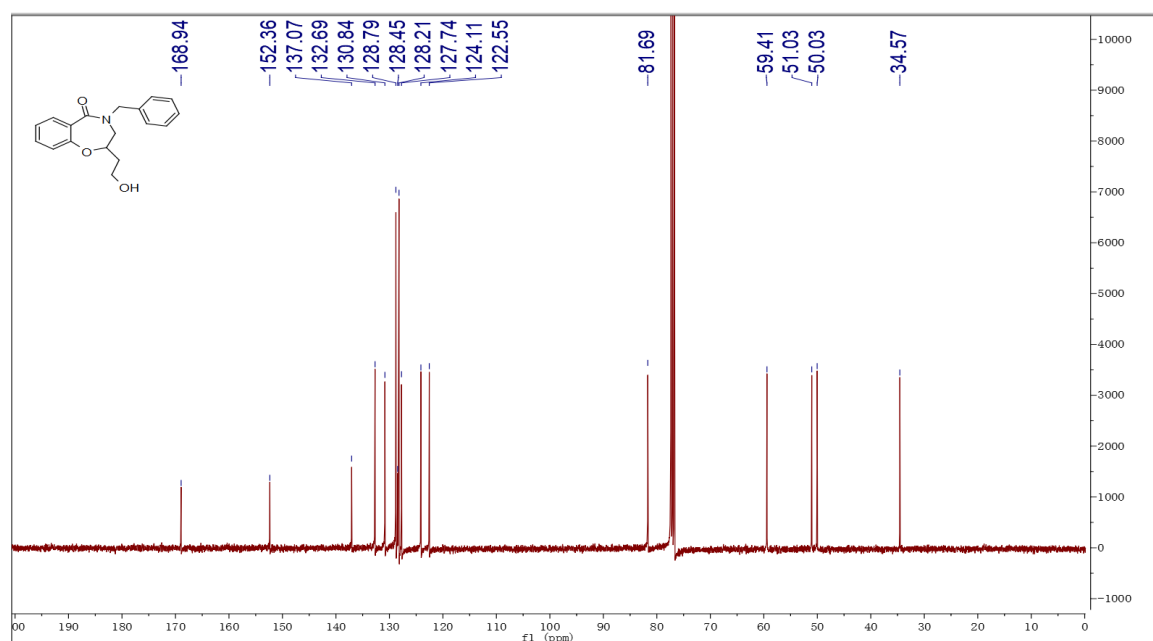

## 5. Copies of HPLC Chromatograms

**Figure 103. HPLC spectra of 2a**

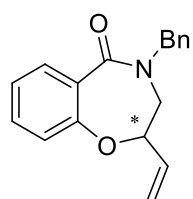

**2a** (The top one is racemic, and the bottom one is chiral)

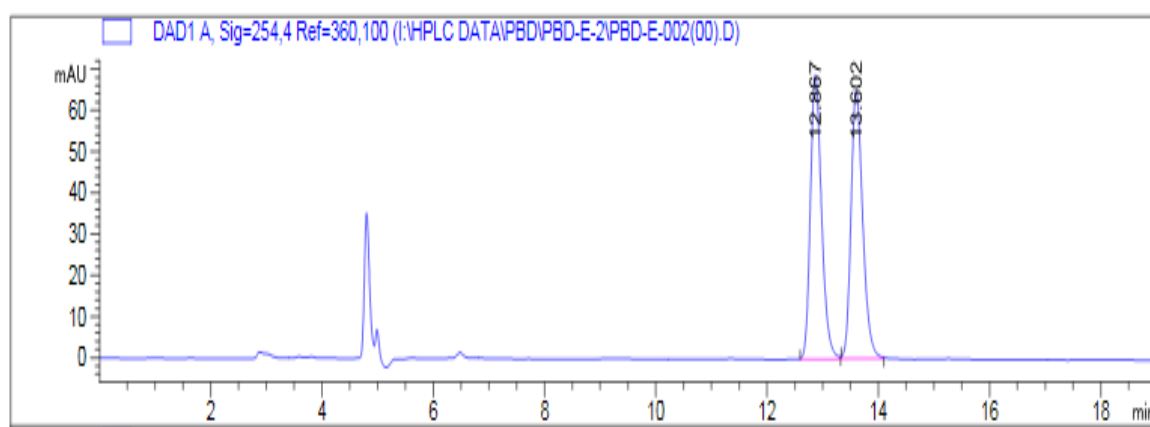

| 峰 # | 保留时间 [min] | 类型 | 峰宽 [min] | 峰面积 [mAU*s] | 峰高 [mAU] | 峰面积 %   |
|-----|------------|----|----------|-------------|----------|---------|
| 1   | 12.867     | BB | 0.2123   | 958.95203   | 68.94242 | 50.2563 |
| 2   | 13.602     | BB | 0.2240   | 949.17218   | 65.12415 | 49.7437 |

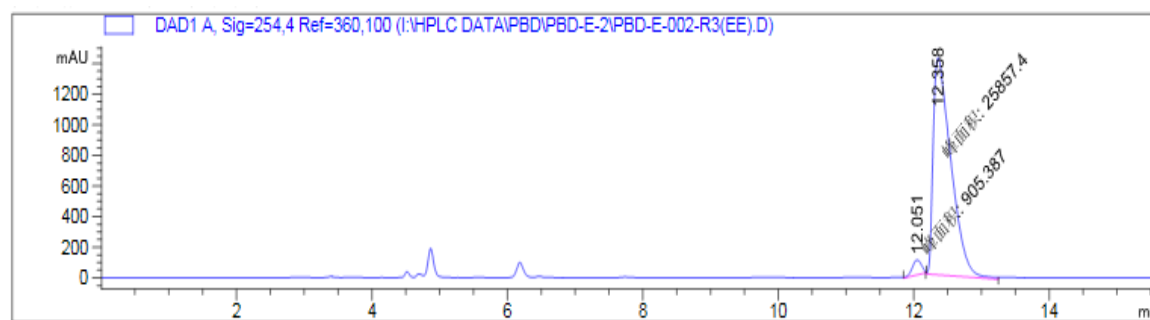

| 峰 # | 保留时间 [min] | 类型 | 峰宽 [min] | 峰面积 [mAU*s] | 峰高 [mAU]   | 峰面积 %   |
|-----|------------|----|----------|-------------|------------|---------|
| 1   | 12.051     | MM | 0.1550   | 905.38708   | 97.36284   | 3.3830  |
| 2   | 12.358     | MM | 0.3035   | 2.58574e4   | 1419.93005 | 96.6170 |

**Figure 104. HPLC spectra of 2b**

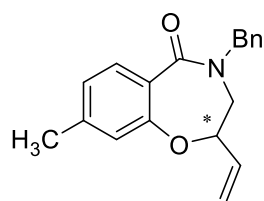

**2b** (The top one is racemic, and the bottom one is chiral)

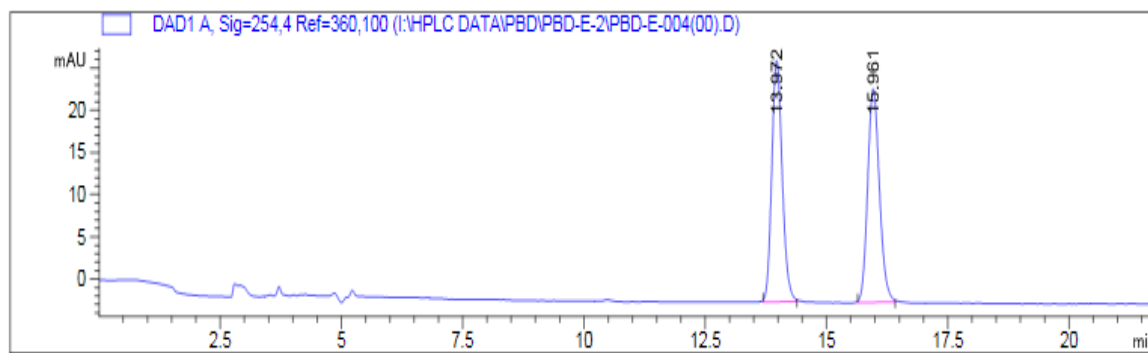

| 峰 # | 保留时间 [min] | 类型 | 峰宽 [min] | 峰面积 [mAU*s] | 峰高 [mAU] | 峰面积 %   |
|-----|------------|----|----------|-------------|----------|---------|
| 1   | 13.972     | BB | 0.2278   | 425.86673   | 28.59163 | 49.9355 |
| 2   | 15.961     | BB | 0.2611   | 426.96609   | 25.27287 | 50.0645 |

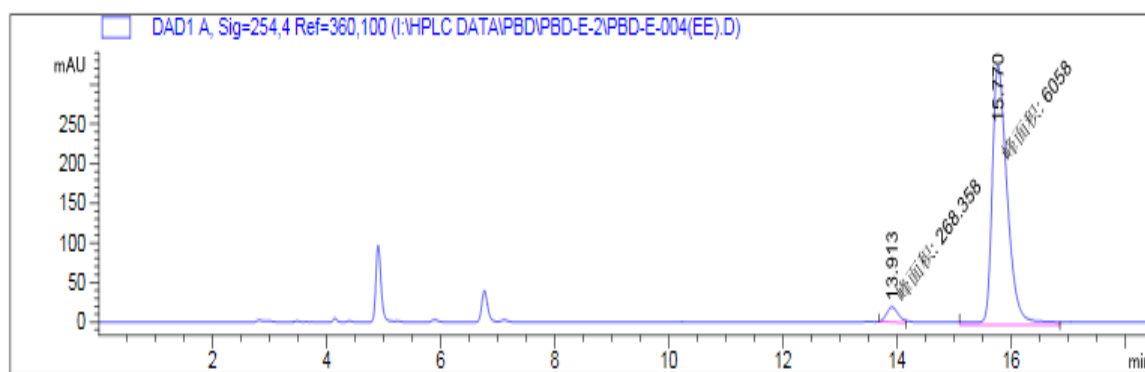

| 峰 # | 保留时间 [min] | 类型 | 峰宽 [min] | 峰面积 [mAU*s] | 峰高 [mAU]  | 峰面积 %   |
|-----|------------|----|----------|-------------|-----------|---------|
| 1   | 13.913     | MM | 0.2373   | 268.35806   | 18.84915  | 4.2419  |
| 2   | 15.770     | MM | 0.3082   | 6058.00049  | 327.60016 | 95.7581 |



**Figure 105. HPLC spectra of 2c**

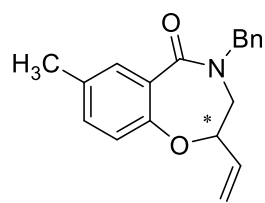

**2c** (The top one is racemic, and the bottom one is chiral)

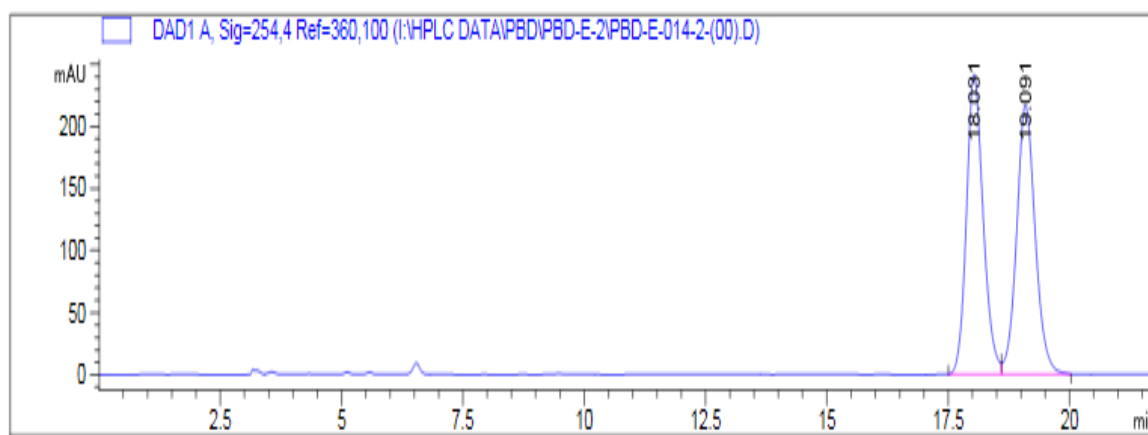

| 峰 # | 保留时间 [min] | 类型 | 峰宽 [min] | 峰面积 [mAU*s] | 峰高 [mAU]  | 峰面积 %   |
|-----|------------|----|----------|-------------|-----------|---------|
| 1   | 18.031     | BV | 0.3655   | 5786.64502  | 241.58044 | 50.0399 |
| 2   | 19.091     | VB | 0.4042   | 5777.41064  | 217.26256 | 49.9601 |

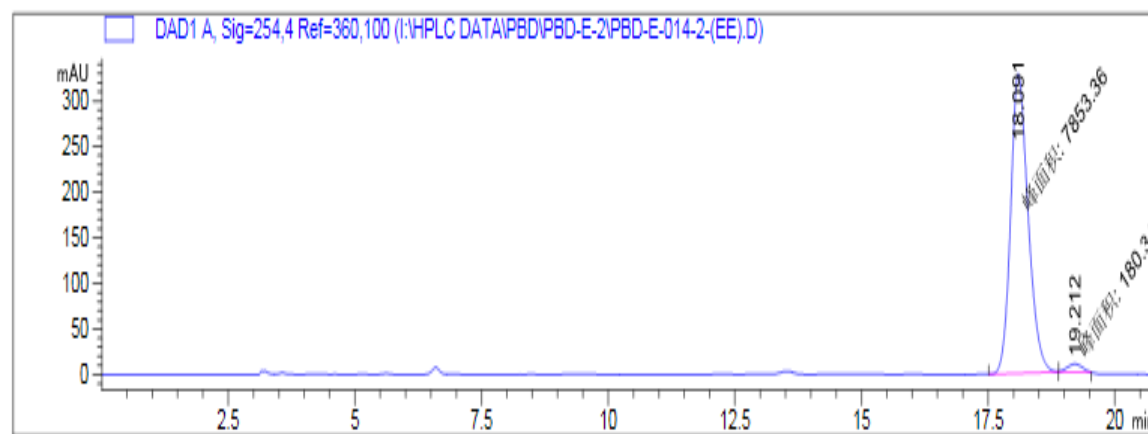

| 峰 # | 保留时间 [min] | 类型 | 峰宽 [min] | 峰面积 [mAU*s] | 峰高 [mAU]  | 峰面积 %   |
|-----|------------|----|----------|-------------|-----------|---------|
| 1   | 18.091     | MM | 0.3987   | 7853.35840  | 328.30087 | 97.7551 |
| 2   | 19.212     | MM | 0.3415   | 180.34630   | 8.80073   | 2.2449  |

**Figure 106. HPLC spectra of 2d**

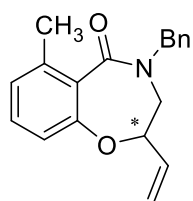

**2d** (The top one is racemic, and the bottom one is chiral)

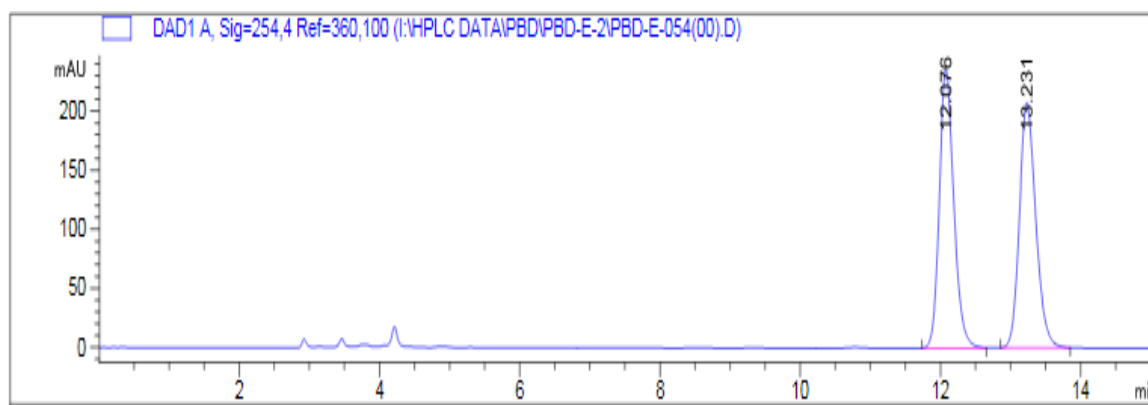

| 峰 # | 保留时间 [min] | 类型 | 峰宽 [min] | 峰面积 [mAU*s] | 峰高 [mAU]  | 峰面积 %   |
|-----|------------|----|----------|-------------|-----------|---------|
| 1   | 12.076     | BB | 0.2190   | 3379.71948  | 236.11810 | 50.0966 |
| 2   | 13.231     | BB | 0.2490   | 3366.67969  | 207.77133 | 49.9034 |

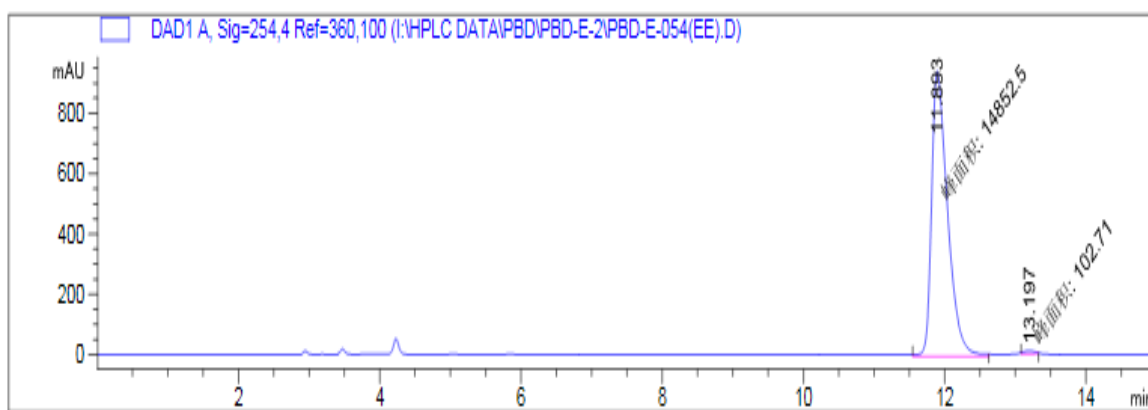

| 峰 # | 保留时间 [min] | 类型 | 峰宽 [min] | 峰面积 [mAU*s] | 峰高 [mAU]  | 峰面积 %   |
|-----|------------|----|----------|-------------|-----------|---------|
| 1   | 11.893     | MM | 0.2617   | 1.48525e4   | 945.82159 | 99.3132 |
| 2   | 13.197     | MM | 0.1785   | 102.71011   | 9.58746   | 0.6868  |

**Figure 107. HPLC spectra of 2e**

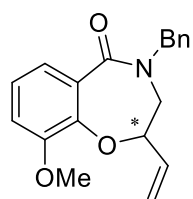

**2e** (The top one is racemic, and the bottom one is chiral)

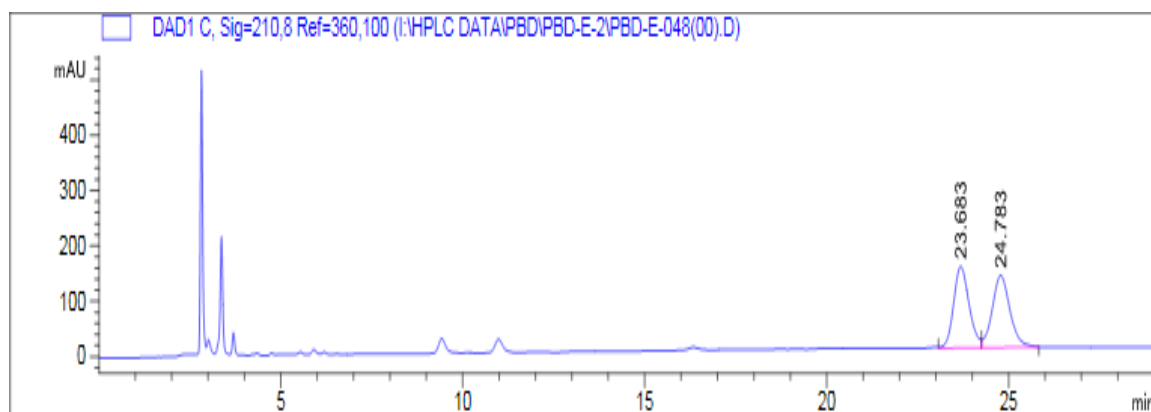

| 峰 # | 保留时间 [min] | 类型 | 峰宽 [min] | 峰面积 [mAU*s] | 峰高 [mAU]  | 峰面积 %   |
|-----|------------|----|----------|-------------|-----------|---------|
| 1   | 23.683     | BV | 0.4561   | 4359.03174  | 146.94899 | 49.7178 |
| 2   | 24.783     | VB | 0.5134   | 4408.52344  | 130.09148 | 50.2822 |

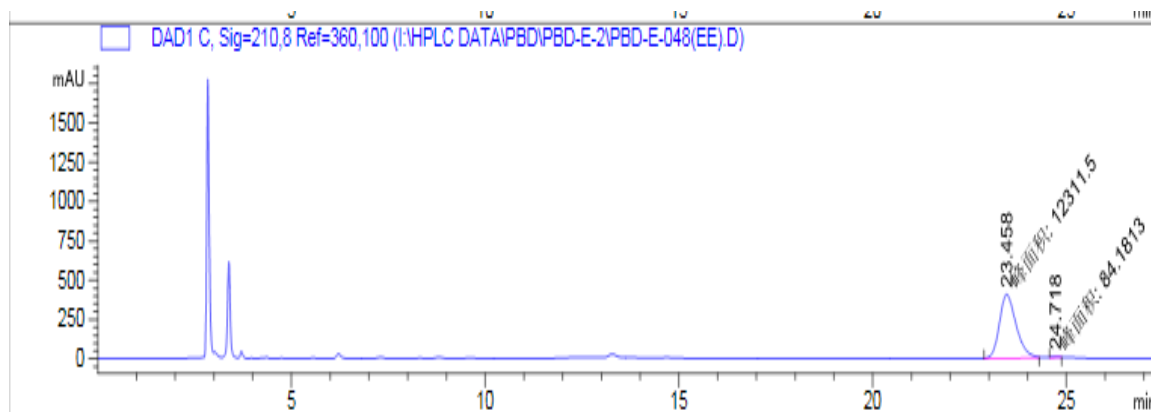

| 峰 # | 保留时间 [min] | 类型 | 峰宽 [min] | 峰面积 [mAU*s] | 峰高 [mAU]  | 峰面积 %   |
|-----|------------|----|----------|-------------|-----------|---------|
| 1   | 23.458     | MM | 0.5061   | 1.23115e4   | 405.41901 | 99.3209 |
| 2   | 24.718     | MM | 0.2665   | 84.18134    | 5.26373   | 0.6791  |

**Figure 108. HPLC spectra of 2f**

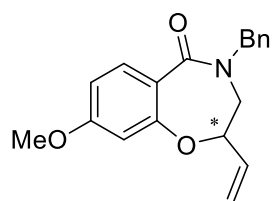

**2f** (The top one is racemic, and the bottom one is chiral)

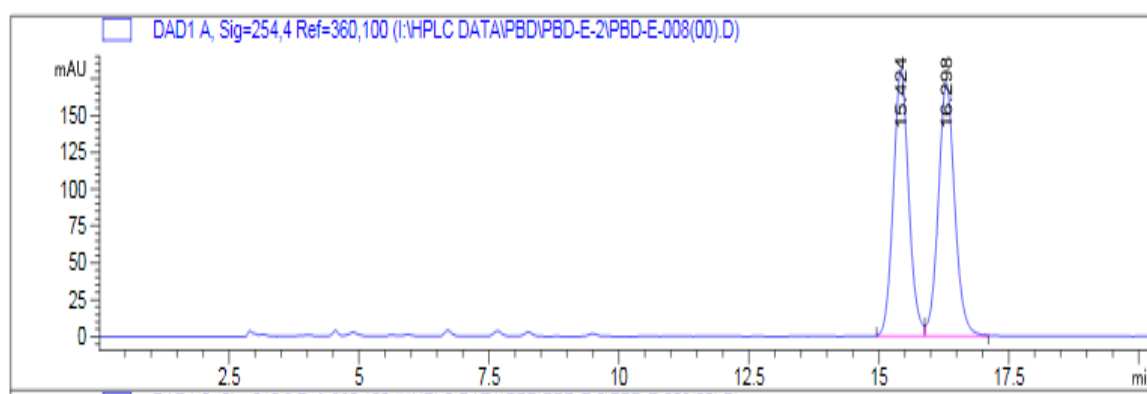

| 峰 # | 保留时间 [min] | 类型 | 峰宽 [min] | 峰面积 [mAU*s] | 峰高 [mAU]  | 峰面积 %   |
|-----|------------|----|----------|-------------|-----------|---------|
| 1   | 15.424     | BV | 0.3164   | 3727.25977  | 180.91608 | 49.6466 |
| 2   | 16.298     | VB | 0.3370   | 3780.31714  | 171.59616 | 50.3534 |

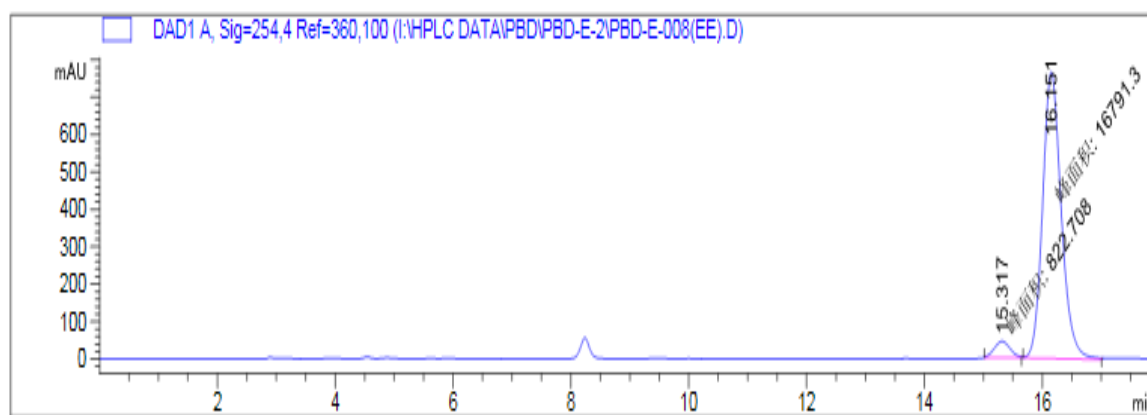

| 峰 # | 保留时间 [min] | 类型 | 峰宽 [min] | 峰面积 [mAU*s] | 峰高 [mAU]  | 峰面积 %   |
|-----|------------|----|----------|-------------|-----------|---------|
| 1   | 15.317     | MM | 0.3119   | 822.70837   | 43.95664  | 4.6708  |
| 2   | 16.151     | MM | 0.3650   | 1.67912e4   | 766.69623 | 95.3292 |

**Figure 109. HPLC spectra of 2g**

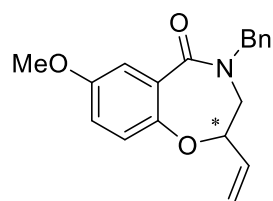

**2g** (The top one is racemic, and the bottom one is chiral)

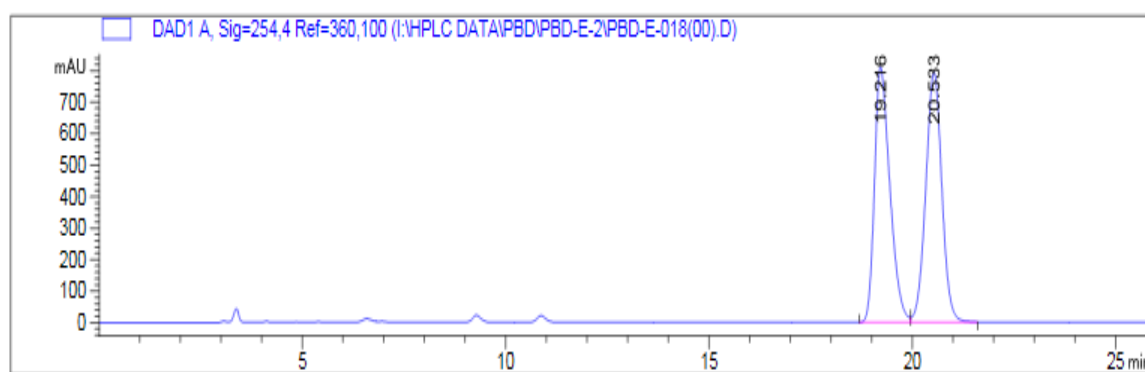

| 峰 # | 保留时间 [min] | 类型 | 峰宽 [min] | 峰面积 [mAU*s] | 峰高 [mAU]  | 峰面积 %   |
|-----|------------|----|----------|-------------|-----------|---------|
| 1   | 19.216     | BV | 0.3964   | 2.13216e4   | 811.85779 | 49.4274 |
| 2   | 20.533     | VB | 0.4248   | 2.18156e4   | 793.29089 | 50.5726 |

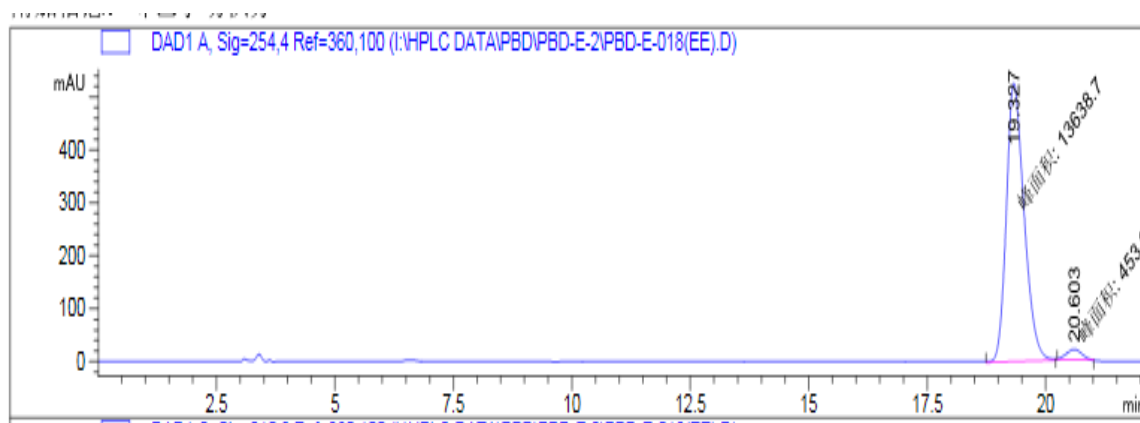

| 峰 # | 保留时间 [min] | 类型 | 峰宽 [min] | 峰面积 [mAU*s] | 峰高 [mAU]  | 峰面积 %   |
|-----|------------|----|----------|-------------|-----------|---------|
| 1   | 19.327     | MM | 0.4326   | 1.36387e4   | 525.45337 | 96.7786 |
| 2   | 20.603     | MM | 0.3822   | 453.98239   | 19.79851  | 3.2214  |

**Figure 110. HPLC spectra of 2h**

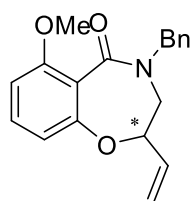

**2h** (The top one is racemic, and the bottom one is chiral)

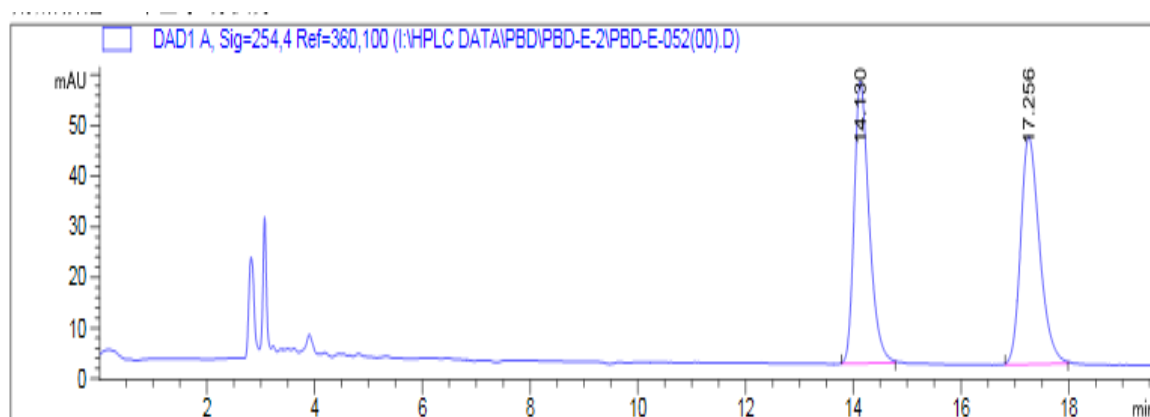

| 峰 # | 保留时间 [min] | 类型 | 峰宽 [min] | 峰面积 [mAU*s] | 峰高 [mAU] | 峰面积 %   |
|-----|------------|----|----------|-------------|----------|---------|
| 1   | 14.130     | BB | 0.2910   | 1077.04321  | 55.85306 | 49.5612 |
| 2   | 17.256     | BB | 0.3697   | 1096.11682  | 45.08308 | 50.4388 |

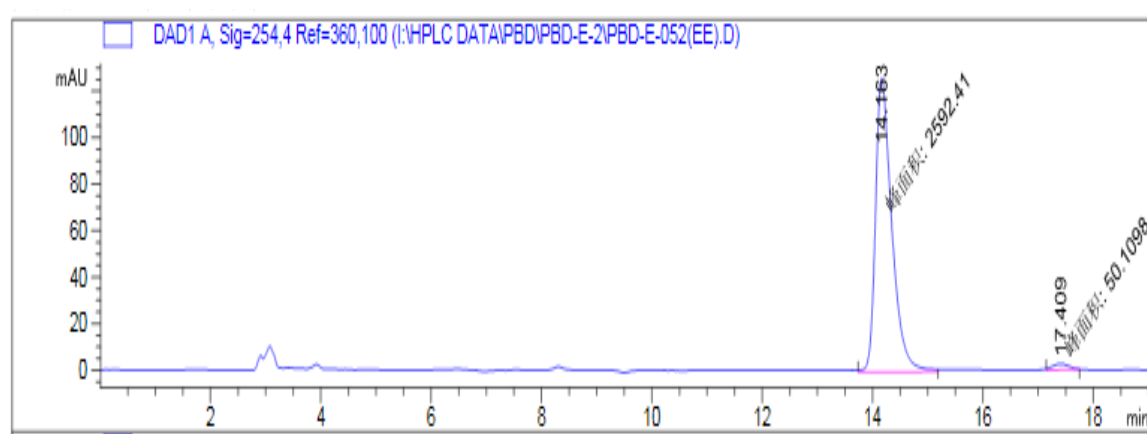

| 峰 # | 保留时间 [min] | 类型 | 峰宽 [min] | 峰面积 [mAU*s] | 峰高 [mAU]  | 峰面积 %   |
|-----|------------|----|----------|-------------|-----------|---------|
| 1   | 14.163     | MM | 0.3418   | 2592.40845  | 126.41183 | 98.1037 |
| 2   | 17.409     | MM | 0.3399   | 50.10984    | 2.45744   | 1.8963  |

**Figure 111. HPLC spectra of 2i**

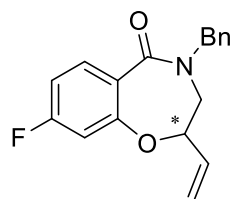

**2i** (The top one is racemic, and the bottom one is chiral)

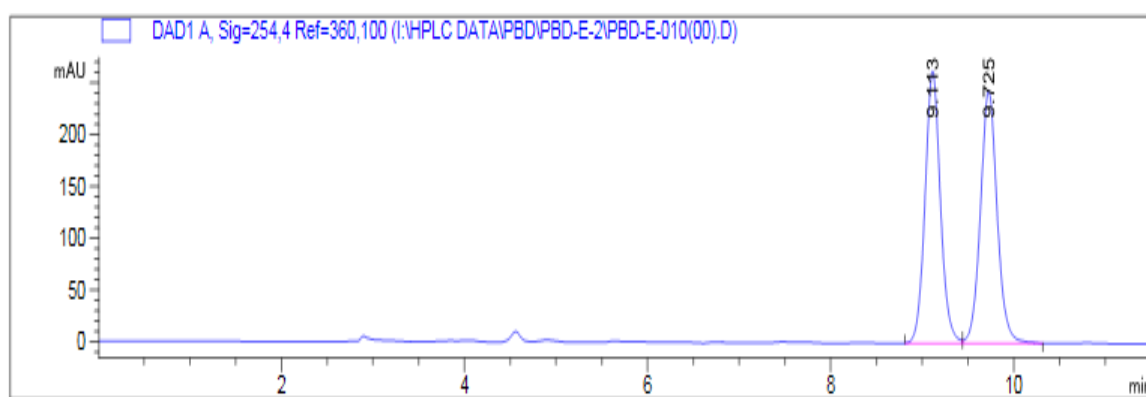

| 峰 # | 保留时间 [min] | 类型 | 峰宽 [min] | 峰面积 [mAU*s] | 峰高 [mAU]  | 峰面积 %   |
|-----|------------|----|----------|-------------|-----------|---------|
| 1   | 9.113      | BV | 0.1780   | 3067.32642  | 263.17606 | 49.7234 |
| 2   | 9.725      | VB | 0.1942   | 3101.44653  | 244.09389 | 50.2766 |

....

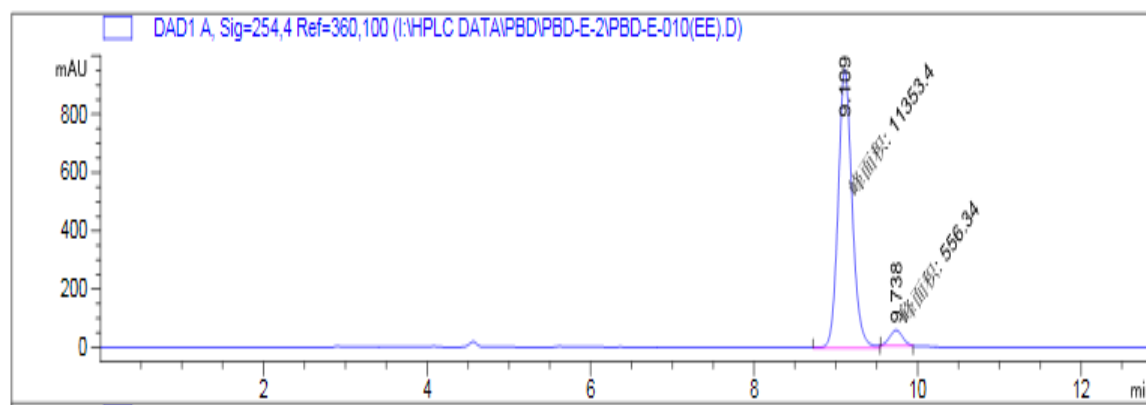

| 峰 # | 保留时间 [min] | 类型 | 峰宽 [min] | 峰面积 [mAU*s] | 峰高 [mAU]  | 峰面积 %   |
|-----|------------|----|----------|-------------|-----------|---------|
| 1   | 9.109      | MM | 0.1974   | 1.13534e4   | 958.51825 | 95.3287 |
| 2   | 9.738      | MM | 0.1791   | 556.34009   | 51.77598  | 4.6713  |

**Figure 112. HPLC spectra of 2j**

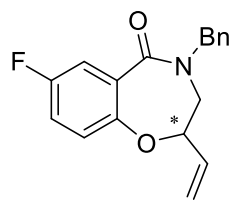

**2j** (The top one is racemic, and the bottom one is chiral)

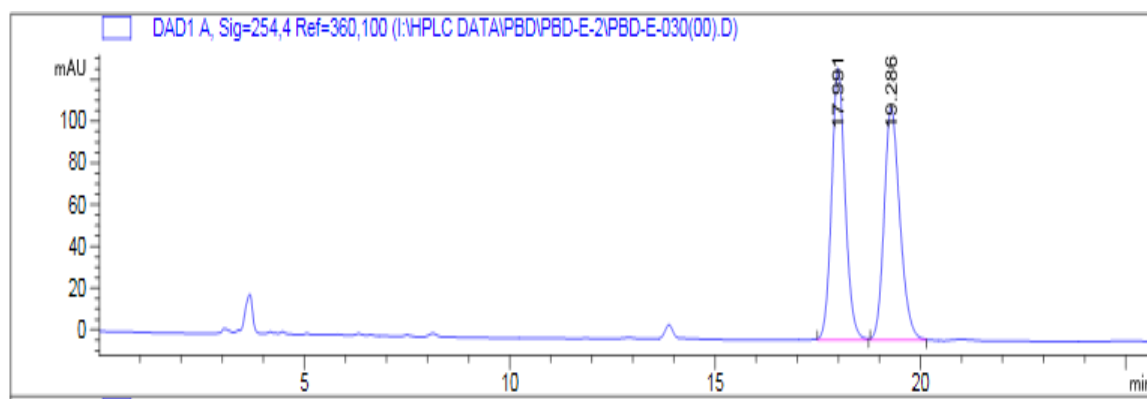

| 峰 # | 保留时间 [min] | 类型 | 峰宽 [min] | 峰面积 [mAU*s] | 峰高 [mAU]  | 峰面积 %   |
|-----|------------|----|----------|-------------|-----------|---------|
| 1   | 17.991     | BB | 0.3496   | 2984.93042  | 130.12889 | 50.0440 |
| 2   | 19.286     | BB | 0.4056   | 2979.68286  | 111.57561 | 49.9560 |

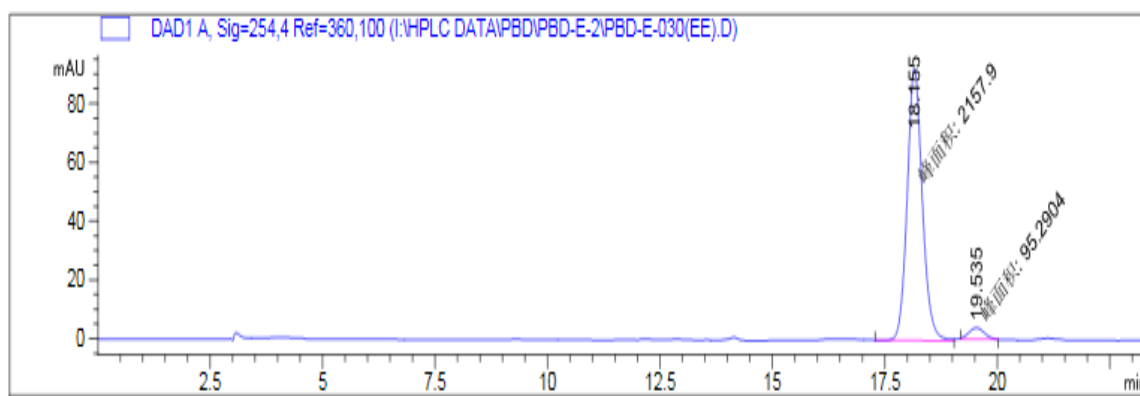

| 峰 # | 保留时间 [min] | 类型 | 峰宽 [min] | 峰面积 [mAU*s] | 峰高 [mAU] | 峰面积 %   |
|-----|------------|----|----------|-------------|----------|---------|
| 1   | 18.155     | MM | 0.3887   | 2157.89600  | 92.53067 | 95.7709 |
| 2   | 19.535     | MM | 0.4026   | 95.29037    | 3.94457  | 4.2291  |



**Figure 113. HPLC spectra of 2k**

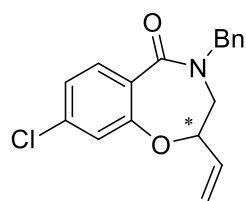

**2k** (The top one is racemic, and the bottom one is chiral)

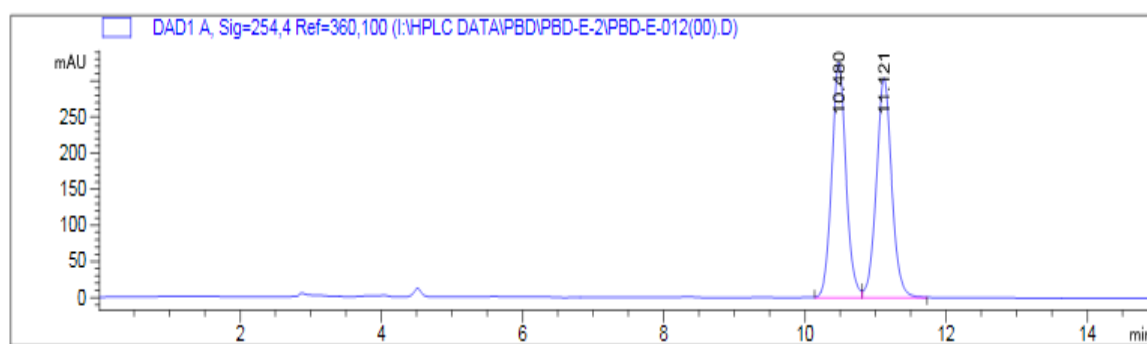

信号 1: DAD1 A, Sig=254,4 Ref=360,100

| 峰 # | 保留时间 [min] | 类型 | 峰宽 [min] | 峰面积 [mAU*s] | 峰高 [mAU]  | 峰面积 %   |
|-----|------------|----|----------|-------------|-----------|---------|
| 1   | 10.480     | BV | 0.2133   | 4558.25049  | 325.57504 | 49.8014 |
| 2   | 11.121     | VB | 0.2304   | 4594.60596  | 303.84317 | 50.1986 |

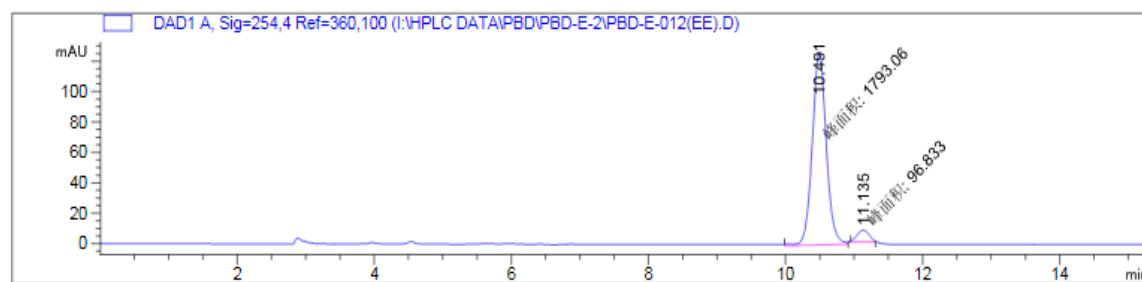

| 峰 # | 保留时间 [min] | 类型 | 峰宽 [min] | 峰面积 [mAU*s] | 峰高 [mAU]  | 峰面积 %   |
|-----|------------|----|----------|-------------|-----------|---------|
| 1   | 10.491     | MM | 0.2353   | 1793.05981  | 127.00144 | 94.8763 |
| 2   | 11.135     | MM | 0.2074   | 96.83298    | 7.78169   | 5.1237  |

**Figure 114. HPLC spectra of 21**

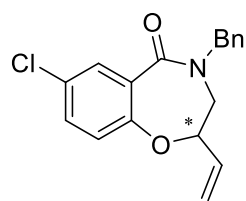

**21** (The top one is racemic, and the bottom one is chiral)

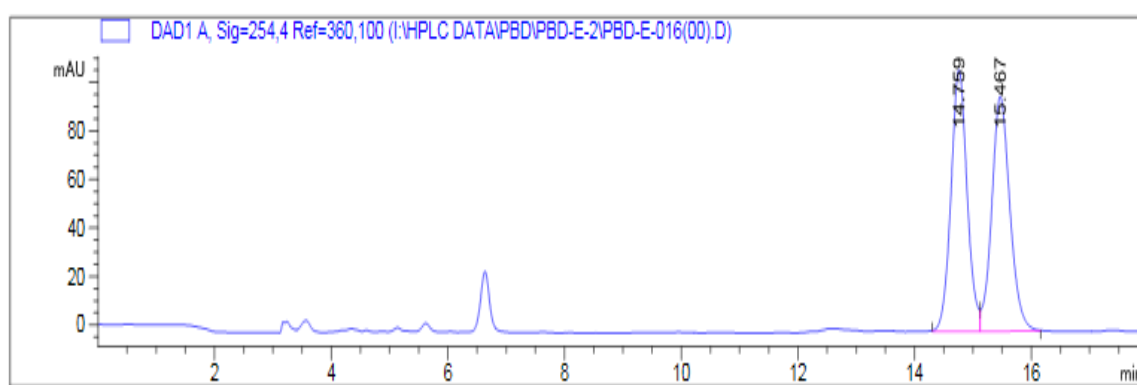

| 峰 # | 保留时间 [min] | 类型 | 峰宽 [min] | 峰面积 [mAU*s] | 峰高 [mAU]  | 峰面积 %   |
|-----|------------|----|----------|-------------|-----------|---------|
| 1   | 14.759     | BV | 0.2919   | 2069.95288  | 107.87402 | 49.6756 |
| 2   | 15.467     | VB | 0.3288   | 2096.98657  | 96.77274  | 50.3244 |

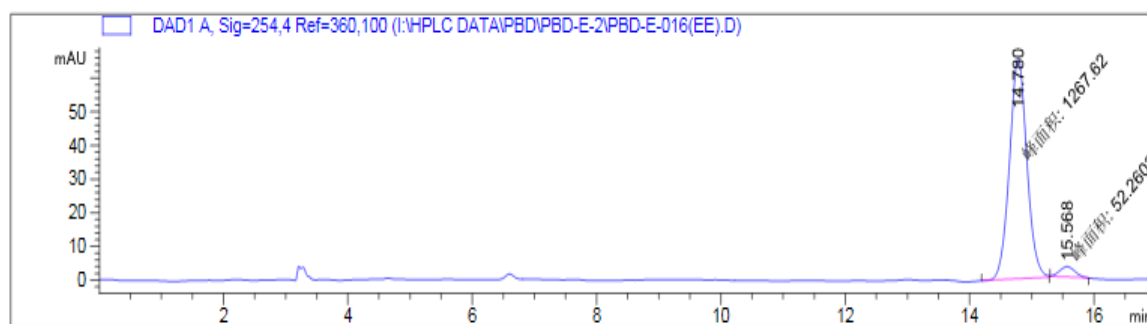

| 峰 # | 保留时间 [min] | 类型 | 峰宽 [min] | 峰面积 [mAU*s] | 峰高 [mAU] | 峰面积 %   |
|-----|------------|----|----------|-------------|----------|---------|
| 1   | 14.780     | MM | 0.3231   | 1267.62146  | 65.38344 | 96.0405 |
| 2   | 15.568     | MM | 0.2854   | 52.26015    | 3.05154  | 3.9595  |

**Figure 115. HPLC spectra of 2m**

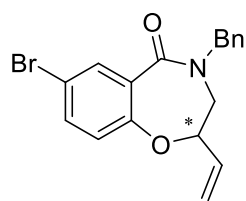

**2m** (The top one is racemic, and the bottom one is chiral)

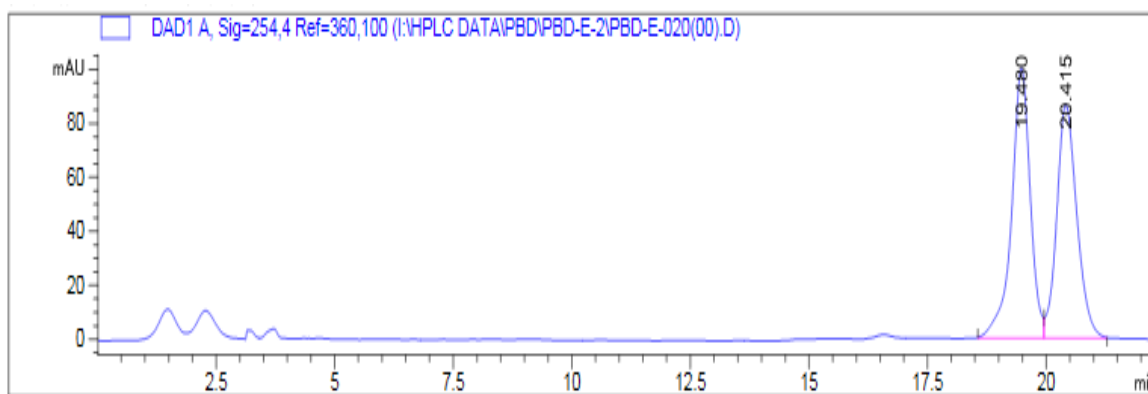

| 峰 # | 保留时间 [min] | 类型 | 峰宽 [min] | 峰面积 [mAU*s] | 峰高 [mAU]  | 峰面积 %   |
|-----|------------|----|----------|-------------|-----------|---------|
| 1   | 19.480     | BV | 0.4094   | 2741.20361  | 100.12223 | 51.7716 |
| 2   | 20.415     | VB | 0.4460   | 2553.60034  | 86.61641  | 48.2284 |

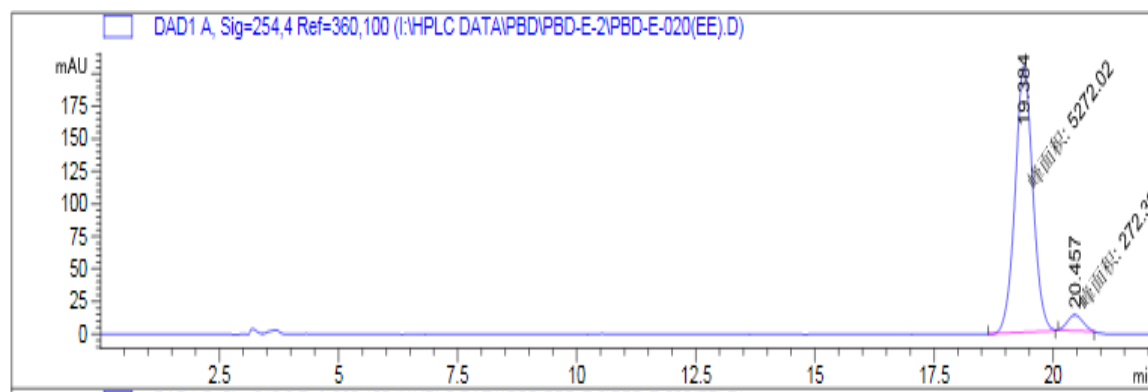

| 峰 # | 保留时间 [min] | 类型 | 峰宽 [min] | 峰面积 [mAU*s] | 峰高 [mAU]  | 峰面积 %   |
|-----|------------|----|----------|-------------|-----------|---------|
| 1   | 19.384     | MM | 0.4299   | 5272.02148  | 204.41234 | 95.0870 |
| 2   | 20.457     | MM | 0.3761   | 272.39450   | 12.07028  | 4.9130  |

**Figure 116. HPLC spectra of 2n**

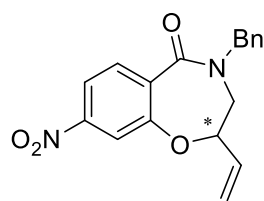

**2n** (The top one is racemic, and the bottom one is chiral)

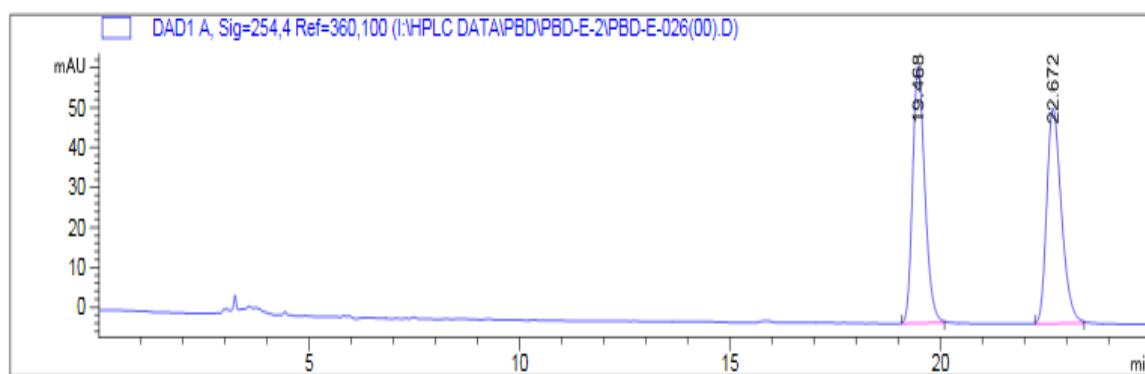

| 峰 # | 保留时间 [min] | 类型 | 峰宽 [min] | 峰面积 [mAU*s] | 峰高 [mAU] | 峰面积 %   |
|-----|------------|----|----------|-------------|----------|---------|
| 1   | 19.468     | BB | 0.3119   | 1302.02173  | 64.38039 | 49.9371 |
| 2   | 22.672     | BB | 0.3729   | 1305.30127  | 53.83696 | 50.0629 |

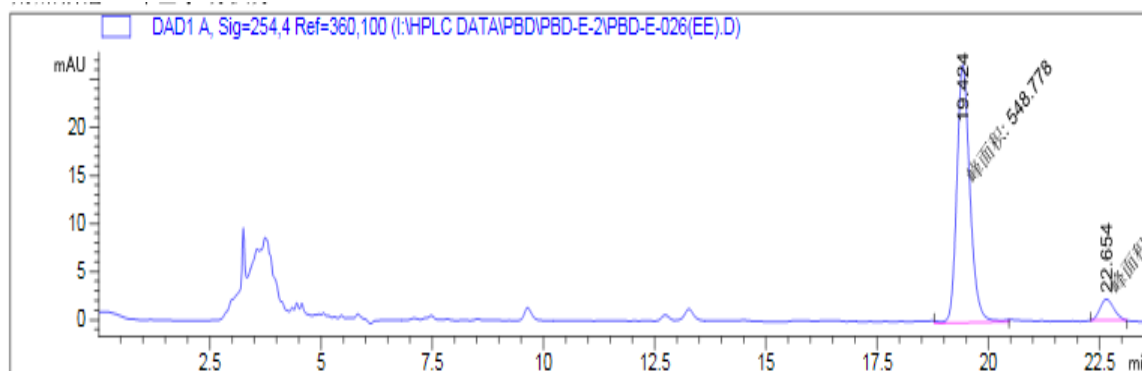

| 峰 # | 保留时间 [min] | 类型 | 峰宽 [min] | 峰面积 [mAU*s] | 峰高 [mAU] | 峰面积 %   |
|-----|------------|----|----------|-------------|----------|---------|
| 1   | 19.424     | MM | 0.3414   | 548.77795   | 26.79387 | 92.1054 |
| 2   | 22.654     | MM | 0.3590   | 47.03728    | 2.18365  | 7.8946  |

**Figure 117. HPLC spectra of 2o**

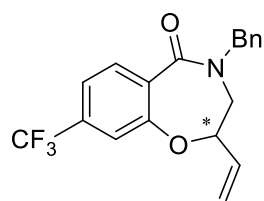

**2o** (The top one is racemic, and the bottom one is chiral)

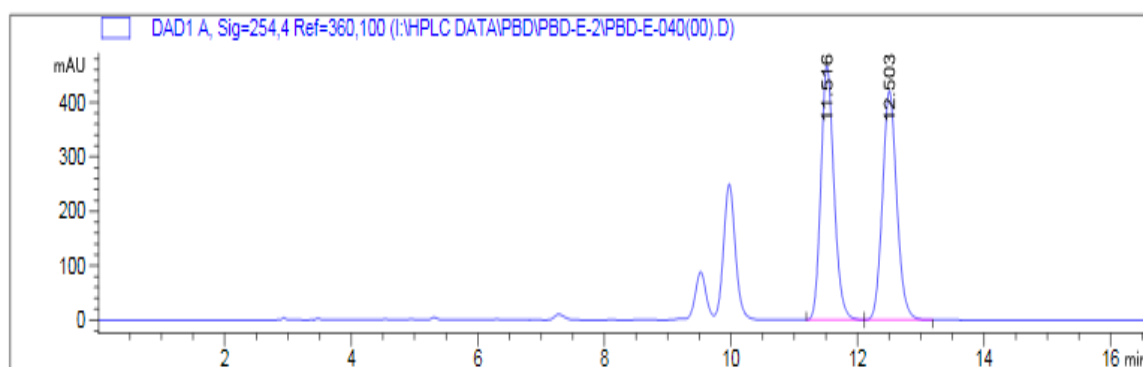

| 峰 # | 保留时间 [min] | 类型 | 峰宽 [min] | 峰面积 [mAU*s] | 峰高 [mAU]  | 峰面积 %   |
|-----|------------|----|----------|-------------|-----------|---------|
| 1   | 11.516     | BV | 0.2220   | 6730.11670  | 467.24707 | 50.3815 |
| 2   | 12.503     | VB | 0.2416   | 6628.18408  | 421.16309 | 49.6185 |

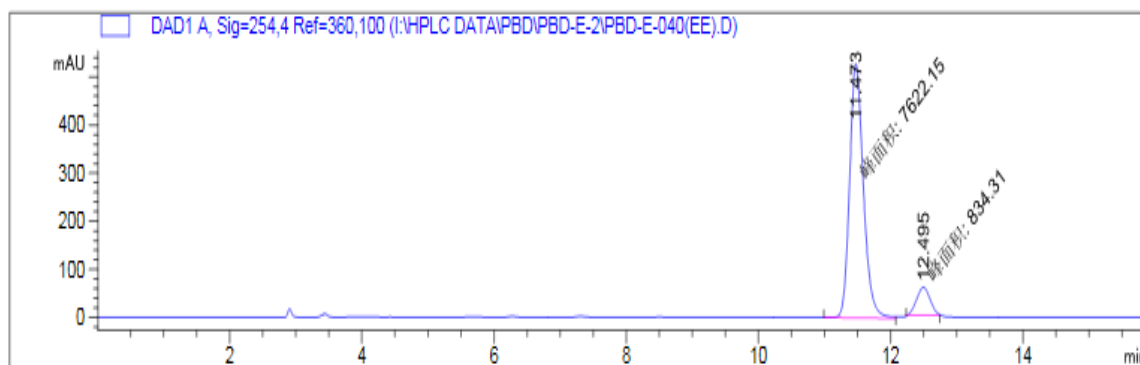

| 峰 # | 保留时间 [min] | 类型 | 峰宽 [min] | 峰面积 [mAU*s] | 峰高 [mAU]  | 峰面积 %   |
|-----|------------|----|----------|-------------|-----------|---------|
| 1   | 11.473     | MM | 0.2402   | 7622.15479  | 528.91931 | 90.1341 |
| 2   | 12.495     | MM | 0.2388   | 834.30988   | 58.24003  | 9.8659  |

**Figure 118. HPLC spectra of 2p**

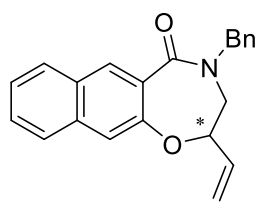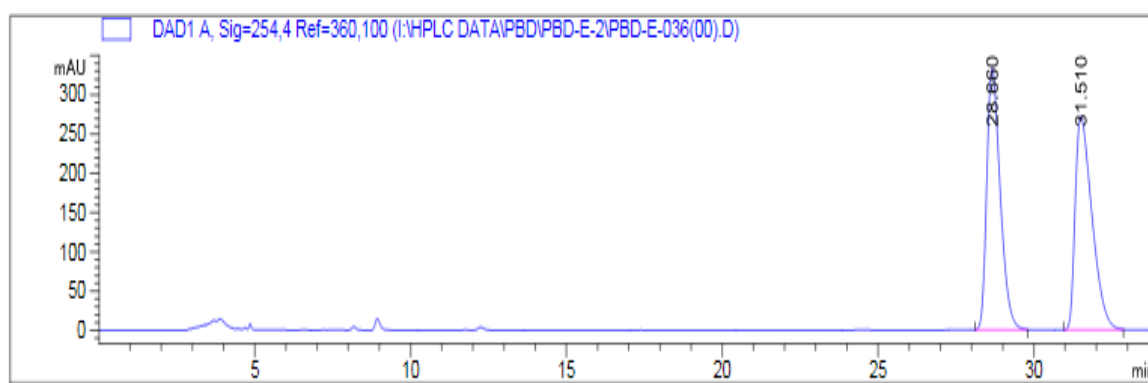

| 峰 # | 保留时间 [min] | 类型 | 峰宽 [min] | 峰面积 [mAU*s] | 峰高 [mAU]  | 峰面积 %   |
|-----|------------|----|----------|-------------|-----------|---------|
| 1   | 28.660     | BB | 0.4598   | 1.00025e4   | 333.56821 | 49.4918 |
| 2   | 31.510     | BB | 0.5779   | 1.02079e4   | 271.98752 | 50.5082 |

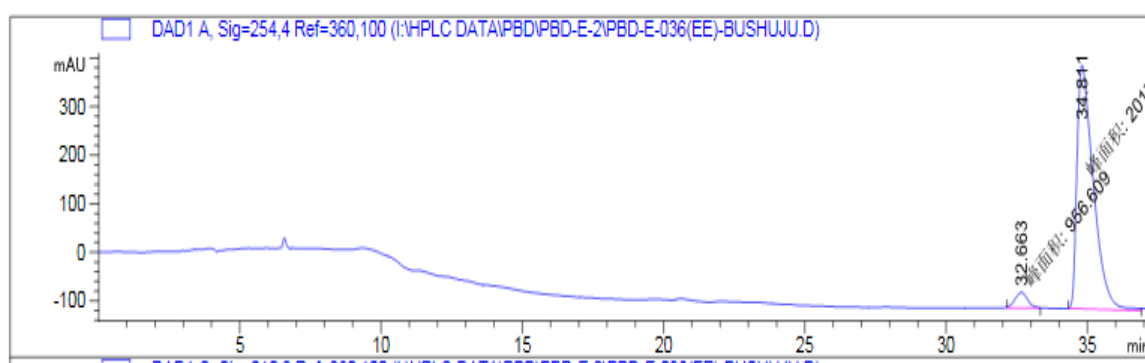

| 峰 # | 保留时间 [min] | 类型 | 峰宽 [min] | 峰面积 [mAU*s] | 峰高 [mAU]  | 峰面积 %   |
|-----|------------|----|----------|-------------|-----------|---------|
| 1   | 32.663     | MM | 0.5075   | 956.60858   | 31.41396  | 4.5264  |
| 2   | 34.811     | MM | 0.6713   | 2.01772e4   | 500.94193 | 95.4736 |

**Figure 119. HPLC spectra of 2q**

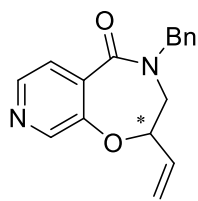

**2q** (The top one is racemic, and the bottom one is chiral)

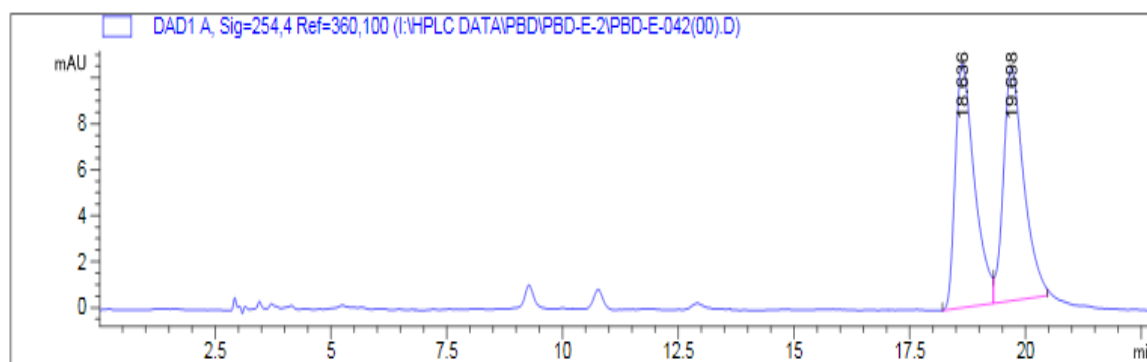

| 峰 # | 保留时间 [min] | 类型 | 峰宽 [min] | 峰面积 [mAU*s] | 峰高 [mAU] | 峰面积 %   |
|-----|------------|----|----------|-------------|----------|---------|
| 1   | 18.636     | BV | 0.4283   | 306.29074   | 10.62653 | 49.6421 |
| 2   | 19.698     | VB | 0.4469   | 310.70764   | 10.15777 | 50.3579 |

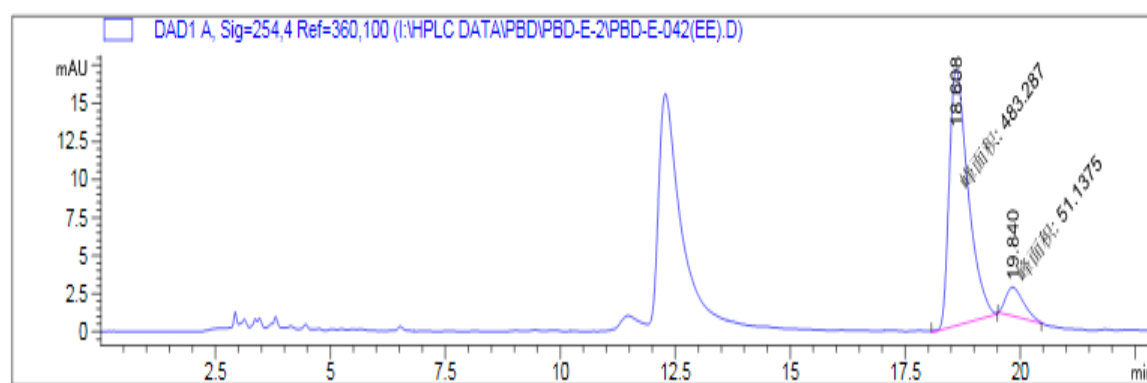

| 峰 # | 保留时间 [min] | 类型 | 峰宽 [min] | 峰面积 [mAU*s] | 峰高 [mAU] | 峰面积 %   |
|-----|------------|----|----------|-------------|----------|---------|
| 1   | 18.608     | MM | 0.4771   | 483.28738   | 16.88255 | 90.4313 |
| 2   | 19.840     | MM | 0.4534   | 51.13749    | 1.87995  | 9.5687  |

**Figure 120. HPLC spectra of 2r**

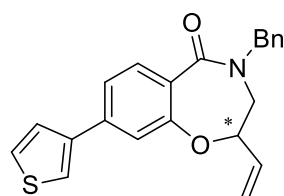

**2r** (The top one is racemic, and the bottom one is chiral)

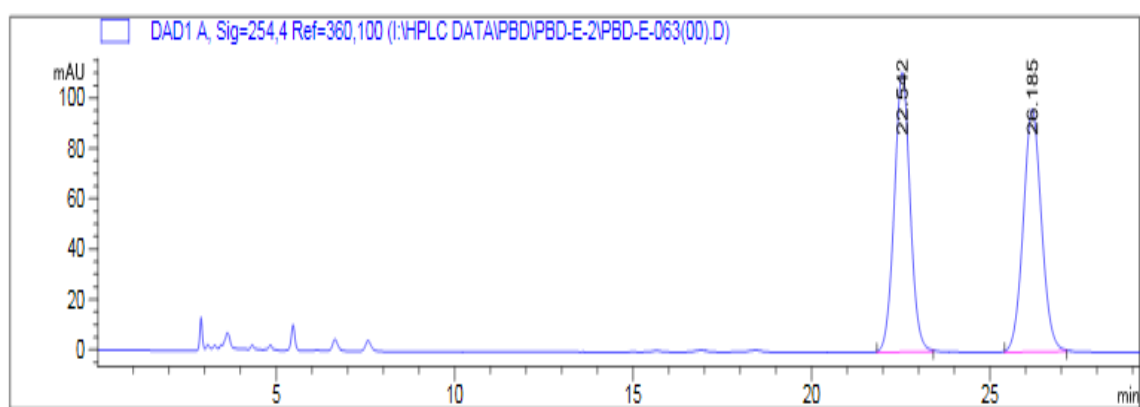

| 峰 # | 保留时间 [min] | 类型 | 峰宽 [min] | 峰面积 [mAU*s] | 峰高 [mAU]  | 峰面积 %   |
|-----|------------|----|----------|-------------|-----------|---------|
| 1   | 22.542     | BB | 0.4735   | 3423.20728  | 111.08373 | 49.9619 |
| 2   | 26.185     | BB | 0.5448   | 3428.42285  | 96.43333  | 50.0381 |

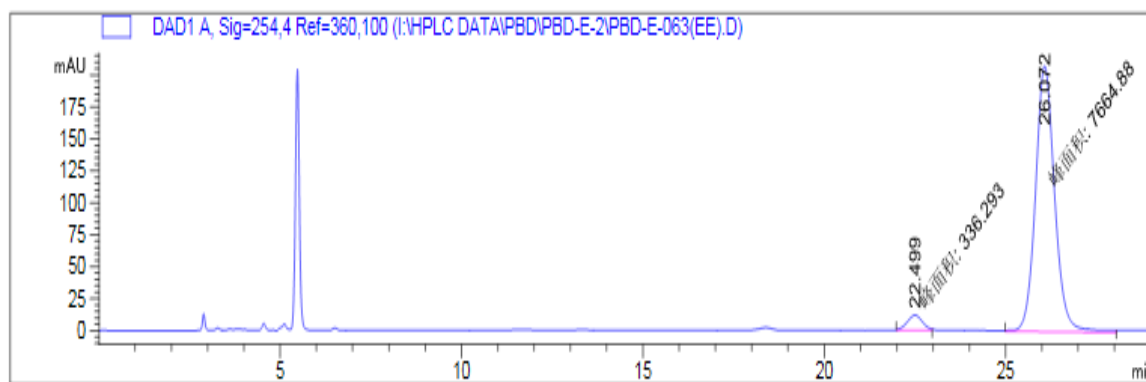

| 峰 # | 保留时间 [min] | 类型 | 峰宽 [min] | 峰面积 [mAU*s] | 峰高 [mAU]  | 峰面积 %   |
|-----|------------|----|----------|-------------|-----------|---------|
| 1   | 22.499     | MM | 0.4826   | 336.29303   | 11.61428  | 4.2030  |
| 2   | 26.072     | MM | 0.6147   | 7664.88232  | 207.83022 | 95.7970 |



**Figure 121. HPLC spectra of 2s**

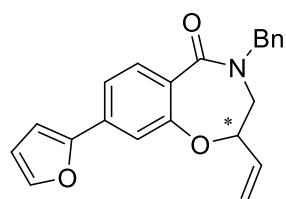

**2s** (The top one is racemic, and the bottom one is chiral)

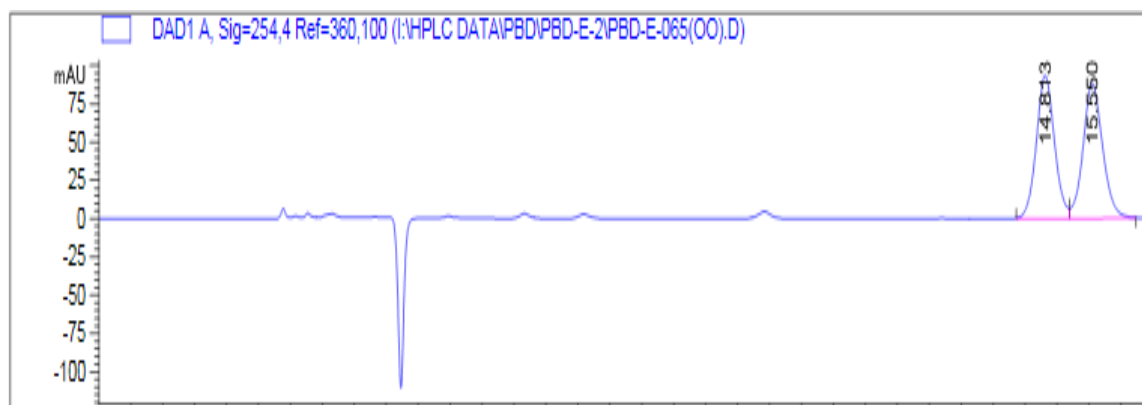

| 峰 # | 保留时间 [min] | 类型 | 峰宽 [min] | 峰面积 [mAU*s] | 峰高 [mAU] | 峰面积 %   |
|-----|------------|----|----------|-------------|----------|---------|
| 1   | 14.813     | BV | 0.2999   | 1839.17896  | 93.32905 | 49.5029 |
| 2   | 15.550     | VB | 0.3229   | 1876.12012  | 87.93398 | 50.4971 |

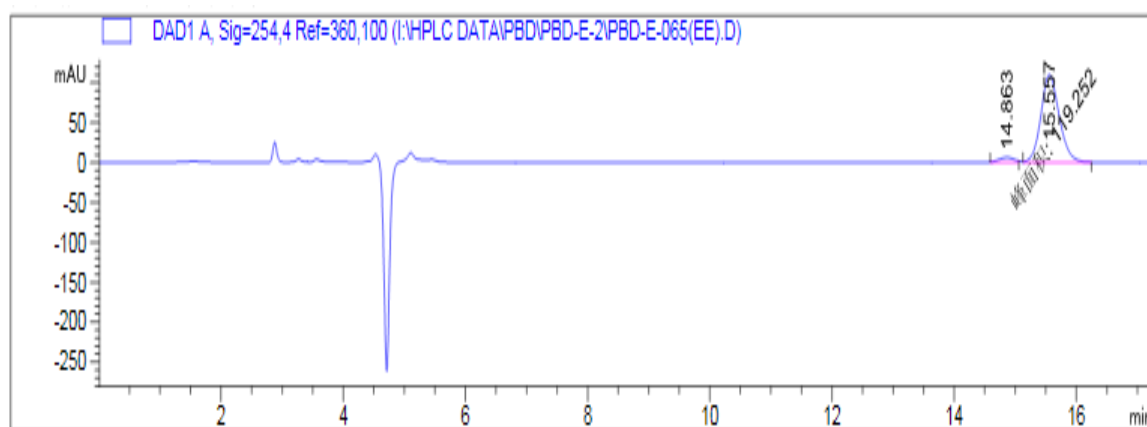

| 峰 # | 保留时间 [min] | 类型 | 峰宽 [min] | 峰面积 [mAU*s] | 峰高 [mAU]  | 峰面积 %   |
|-----|------------|----|----------|-------------|-----------|---------|
| 1   | 14.863     | MM | 0.3010   | 119.25154   | 6.60352   | 4.9006  |
| 2   | 15.557     | VB | 0.3189   | 2314.14966  | 110.23541 | 95.0994 |

**Figure 122. HPLC spectra of 2t**

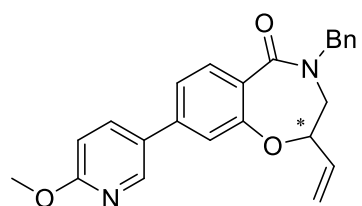

**2t** (The top one is racemic, and the bottom one is chiral)

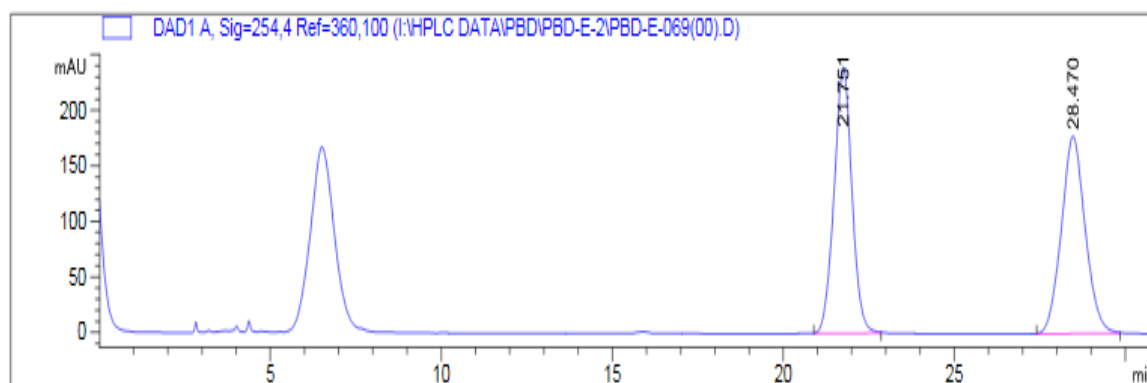

| 峰 # | 保留时间 [min] | 类型 | 峰宽 [min] | 峰面积 [mAU*s] | 峰高 [mAU]  | 峰面积 %   |
|-----|------------|----|----------|-------------|-----------|---------|
| 1   | 21.751     | BB | 0.5465   | 8680.01563  | 239.67952 | 50.1891 |
| 2   | 28.470     | BB | 0.7197   | 8614.59961  | 177.65236 | 49.8109 |

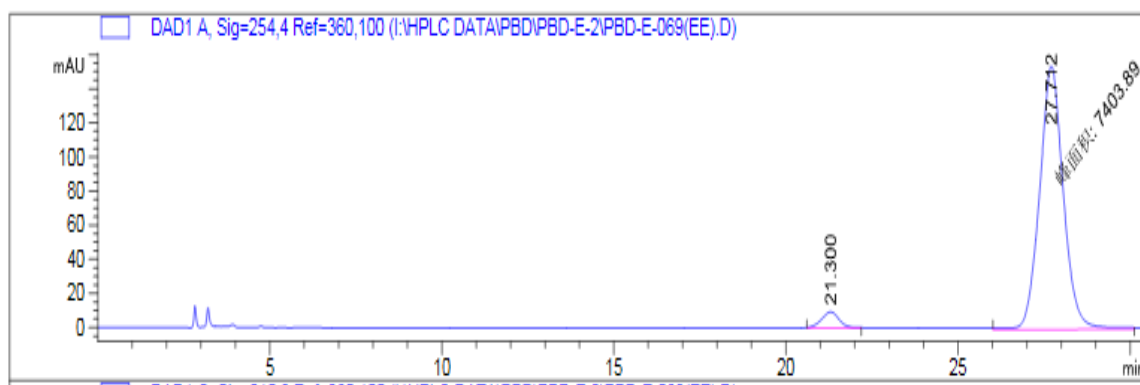

| 峰 # | 保留时间 [min] | 类型 | 峰宽 [min] | 峰面积 [mAU*s] | 峰高 [mAU]  | 峰面积 %   |
|-----|------------|----|----------|-------------|-----------|---------|
| 1   | 21.300     | BB | 0.5340   | 327.78497   | 9.32783   | 4.2395  |
| 2   | 27.712     | MM | 0.7992   | 7403.88672  | 154.40346 | 95.7605 |

**Figure 123. HPLC spectra of 2u**

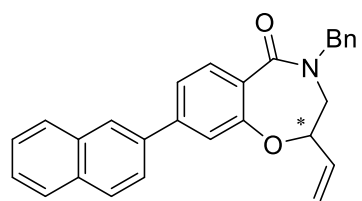

**2u** (The top one is racemic, and the bottom one is chiral)

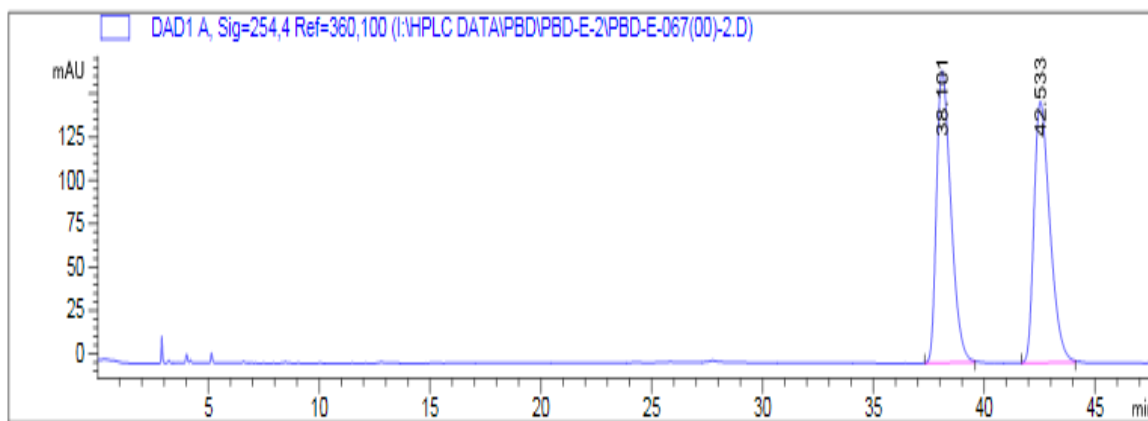

| 峰 # | 保留时间 [min] | 类型 | 峰宽 [min] | 峰面积 [mAU*s] | 峰高 [mAU]  | 峰面积 %   |
|-----|------------|----|----------|-------------|-----------|---------|
| 1   | 38.101     | BB | 0.6993   | 7579.92383  | 168.34131 | 50.3421 |
| 2   | 42.533     | BB | 0.7598   | 7476.89844  | 150.45316 | 49.6579 |

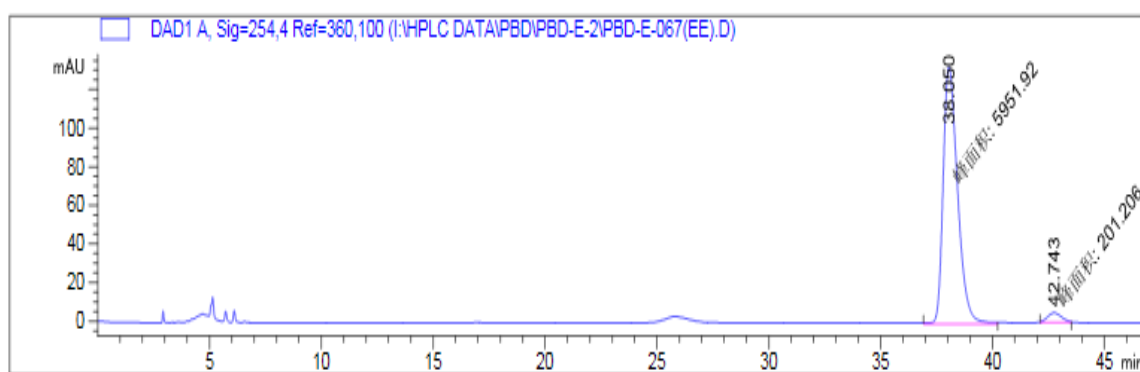

| 峰 # | 保留时间 [min] | 类型 | 峰宽 [min] | 峰面积 [mAU*s] | 峰高 [mAU]  | 峰面积 %   |
|-----|------------|----|----------|-------------|-----------|---------|
| 1   | 38.050     | MM | 0.7458   | 5951.92285  | 133.00870 | 96.7300 |
| 2   | 42.743     | MM | 0.7078   | 201.20631   | 4.73791   | 3.2700  |

**Figure 124. HPLC spectra of 2v**

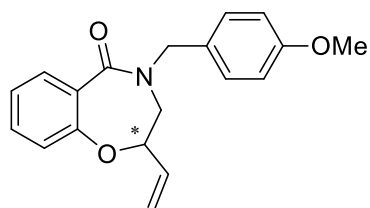

**2v** (The top one is racemic, and the bottom two are chiral)

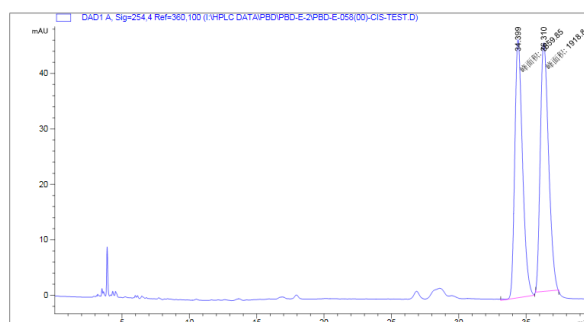

| 峰 # | 保留时间 [min] | 类型 | 峰宽 [min] | 峰面积 [mAU*s] | 峰高 [mAU] | 峰面积 %   |
|-----|------------|----|----------|-------------|----------|---------|
| 1   | 34.399     | MM | 0.6661   | 1859.84827  | 46.53275 | 49.2199 |
| 2   | 36.310     | MM | 0.7139   | 1918.80212  | 44.79788 | 50.7801 |

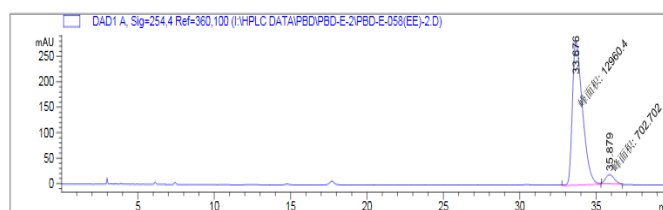

| 峰 # | 保留时间 [min] | 类型 | 峰宽 [min] | 峰面积 [mAU*s] | 峰高 [mAU]  | 峰面积 %   |
|-----|------------|----|----------|-------------|-----------|---------|
| 1   | 33.676     | MM | 0.7690   | 1.29604e4   | 280.88150 | 94.8570 |
| 2   | 35.879     | MM | 0.6541   | 702.70227   | 17.90641  | 5.1430  |

**This one is prepared from cis-substrate (Z-1v).**

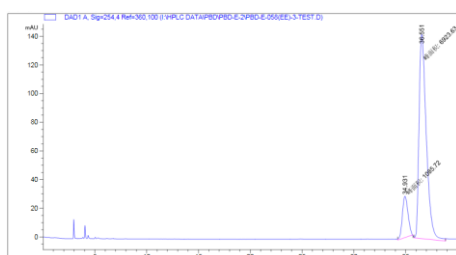

| 峰 # | 保留时间 [min] | 类型 | 峰宽 [min] | 峰面积 [mAU*s] | 峰高 [mAU]  | 峰面积 %   |
|-----|------------|----|----------|-------------|-----------|---------|
| 1   | 34.931     | MM | 0.6271   | 1085.71582  | 28.85613  | 13.5556 |
| 2   | 36.551     | MM | 0.8102   | 6923.62500  | 142.43466 | 86.4444 |

**Figure 125. HPLC spectra of 3v**

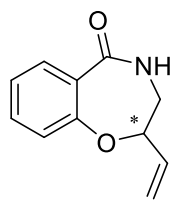

**3v** (The top one is racemic, and the bottom one is chiral)

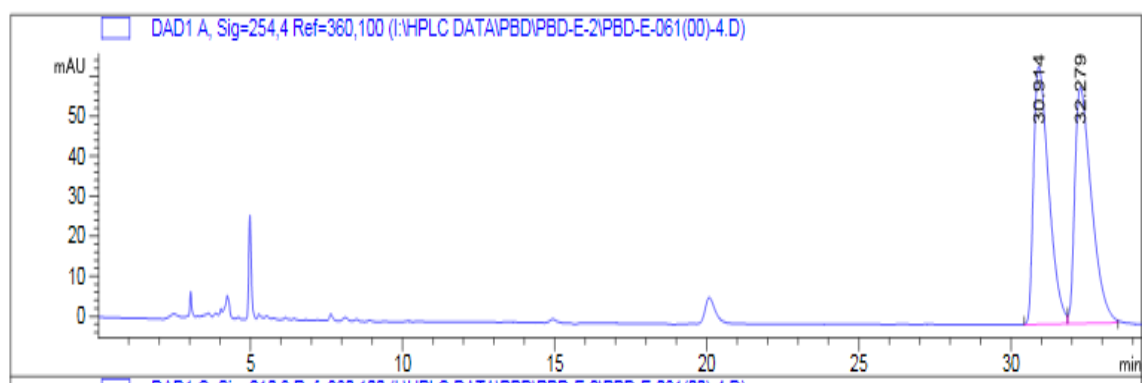

| 峰 # | 保留时间 [min] | 类型 | 峰宽 [min] | 峰面积 [mAU*s] | 峰高 [mAU] | 峰面积 %   |
|-----|------------|----|----------|-------------|----------|---------|
| 1   | 30.914     | BV | 0.5304   | 2232.65527  | 64.41662 | 49.7538 |
| 2   | 32.279     | VB | 0.5785   | 2254.75366  | 58.91465 | 50.2462 |

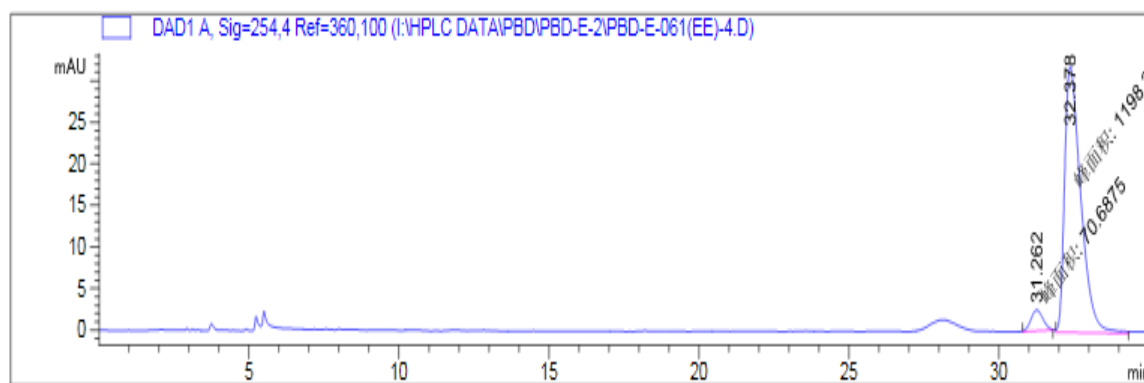

| 峰 # | 保留时间 [min] | 类型 | 峰宽 [min] | 峰面积 [mAU*s] | 峰高 [mAU] | 峰面积 %   |
|-----|------------|----|----------|-------------|----------|---------|
| 1   | 31.262     | MM | 0.4681   | 70.68752    | 2.51670  | 5.5705  |
| 2   | 32.378     | MM | 0.6247   | 1198.28235  | 31.96801 | 94.4295 |

**Figure 126. HPLC spectra of 3a**

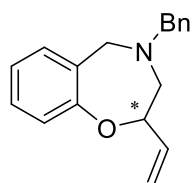

**3a** (The top one is racemic, and the bottom one is chiral)

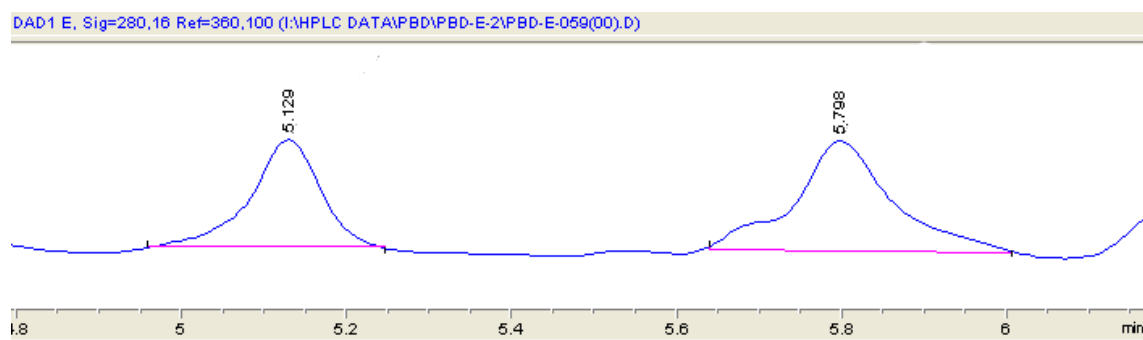

| 峰 # | 保留时间 [min] | 类型 | 峰宽 [min] | 峰面积 [mAU*s] | 峰高 [mAU] | 峰面积 %   |
|-----|------------|----|----------|-------------|----------|---------|
| 1   | 5.130      | MM | 0.1059   | 17.85892    | 2.81030  | 50.0711 |
| 2   | 5.798      | MM | 0.1181   | 17.80818    | 2.51357  | 49.9289 |

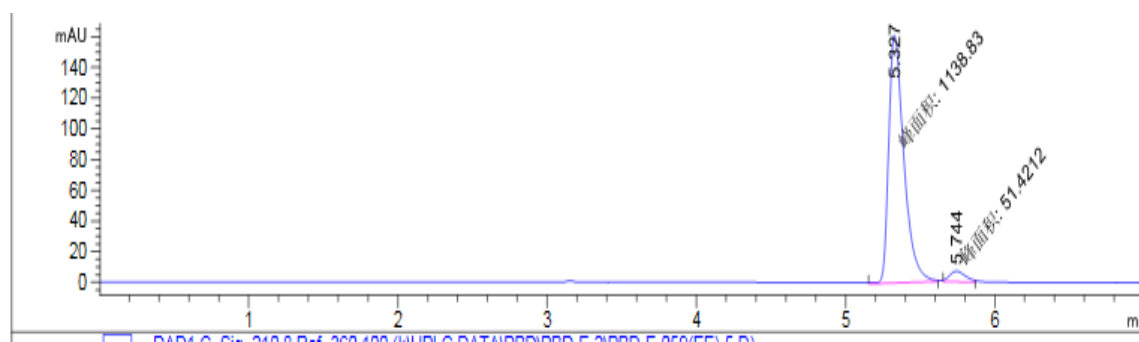

| 峰 # | 保留时间 [min] | 类型 | 峰宽 [min] | 峰面积 [mAU*s] | 峰高 [mAU]  | 峰面积 %   |
|-----|------------|----|----------|-------------|-----------|---------|
| 1   | 5.327      | MM | 0.1174   | 1138.82593  | 161.69975 | 95.6798 |
| 2   | 5.744      | MM | 0.1240   | 51.42119    | 6.90924   | 4.3202  |

**Figure 127. HPLC spectra of 4a**

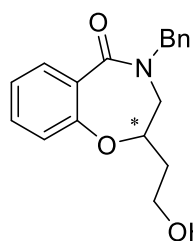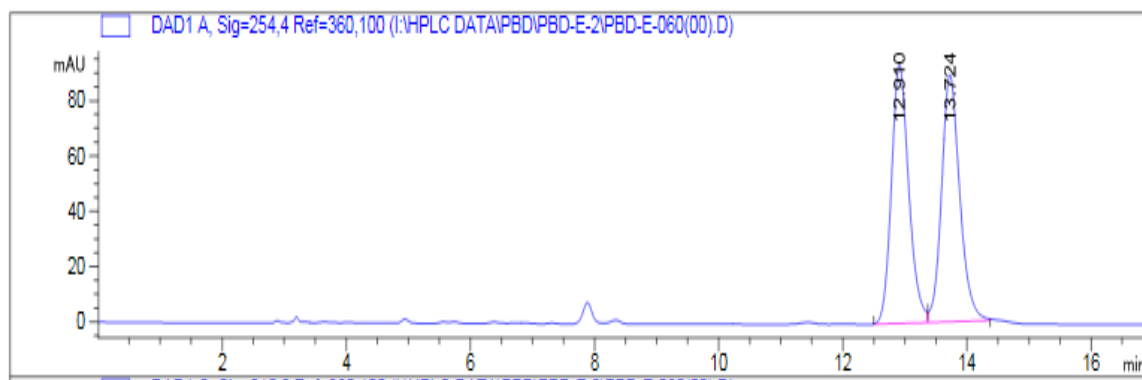

| 峰 # | 保留时间 [min] | 类型 | 峰宽 [min] | 峰面积 [mAU*s] | 峰高 [mAU] | 峰面积 %   |
|-----|------------|----|----------|-------------|----------|---------|
| 1   | 12.910     | BV | 0.2960   | 1813.84961  | 93.63516 | 49.9712 |
| 2   | 13.724     | VB | 0.3094   | 1815.94397  | 89.25263 | 50.0288 |

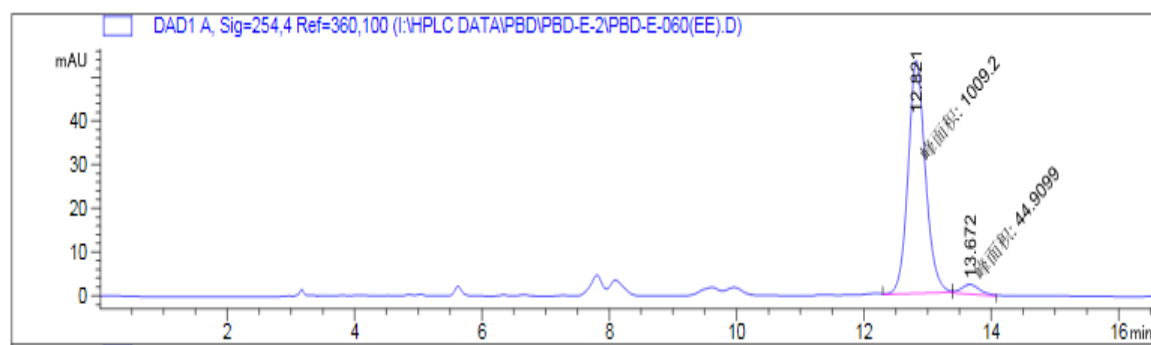

| 峰 # | 保留时间 [min] | 类型 | 峰宽 [min] | 峰面积 [mAU*s] | 峰高 [mAU] | 峰面积 %   |
|-----|------------|----|----------|-------------|----------|---------|
| 1   | 12.821     | MM | 0.3156   | 1009.19513  | 53.29708 | 95.7395 |
| 2   | 13.672     | MM | 0.3375   | 44.90985    | 2.21809  | 4.2605  |

## 6. X-ray Crystallographic Data

Figure 128. X-Ray Crystallographic Data for Compound(*R*)-4a

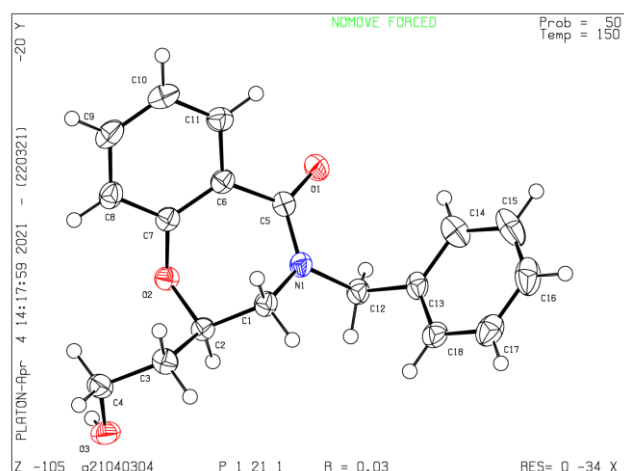

### Structure factors have been supplied for datablock(s) (CCDC: 2076650)

Bond precision: C-C = 0.0025 Å Wavelength=1.54184

Cell: a=7.90381(18) b=8.25775(16) c=12.5469(3)

alpha=90 beta=108.190(3) gamma=90

Temperature: 150 K

|        | Calculated | Reported  |
|--------|------------|-----------|
| Volume | 777.98(3)  | 777.98(3) |

|             |      |          |
|-------------|------|----------|
| Space group | P 21 | P 1 21 1 |
|-------------|------|----------|

|            |       |       |
|------------|-------|-------|
| Hall group | P 2yb | P 2yb |
|------------|-------|-------|

|                |              |              |
|----------------|--------------|--------------|
| Moiety formula | C18 H19 N O3 | C18 H19 N O3 |
|----------------|--------------|--------------|

|             |              |              |
|-------------|--------------|--------------|
| Sum formula | C18 H19 N O3 | C18 H19 N O3 |
|-------------|--------------|--------------|

|    |        |        |
|----|--------|--------|
| Mr | 297.34 | 297.34 |
|----|--------|--------|

|                        |       |       |
|------------------------|-------|-------|
| Dx, g cm <sup>-3</sup> | 1.269 | 1.269 |
|------------------------|-------|-------|

|   |   |   |
|---|---|---|
| Z | 2 | 2 |
|---|---|---|

|                        |       |       |
|------------------------|-------|-------|
| Mu (mm <sup>-1</sup> ) | 0.698 | 0.698 |
|------------------------|-------|-------|

|      |       |       |
|------|-------|-------|
| F000 | 316.0 | 316.0 |
|------|-------|-------|

|       |        |  |
|-------|--------|--|
| F000' | 316.96 |  |
|-------|--------|--|

|          |         |         |
|----------|---------|---------|
| h,k,lmax | 9,10,15 | 9,10,15 |
|----------|---------|---------|

|      |             |      |
|------|-------------|------|
| Nref | 3247[ 1738] | 2225 |
|------|-------------|------|

|           |             |             |
|-----------|-------------|-------------|
| Tmin,Tmax | 0.935,0.966 | 0.954,1.000 |
|-----------|-------------|-------------|

|       |       |  |
|-------|-------|--|
| Tmin' | 0.864 |  |
|-------|-------|--|

Correction method= # Reported T Limits: Tmin=0.954 Tmax=1.000

AbsCorr = MULTI-SCAN

Data completeness= 1.28/0.69

Theta(max)= 75.960

R(reflections)= 0.0278( 2186)

wR2(reflections)= 0.0722( 2225)

S = 1.064

Npar= 201
